# Supplementary material for: Microarray Analysis of Serum mRNA in Patients with Head and Neck Squamous Cell Carcinoma at Whole-Genome Scale
Source: Hindawi journal article supplement (doi:10.1155/2014/408683), 2014-01-01
Supplement: f1 [file 408683.f1.pdf]

## Supporting information

Additional Supporting Information may be found in the online version of this article:

Supplementary Table S1: List of deregulated genes in serum of cancer patients in comparison to serum of healthy individuals ( $p < 0.05$ ,  $\log FC \geq 1$ ).

| ENTREZ Gene ID | Symbol  | Gene Name                                                                      | logFC |
|----------------|---------|--------------------------------------------------------------------------------|-------|
| 8407           | TAGLN2  | transgelin 2                                                                   | 3,78  |
| 7035           | TFPI    | tissue factor pathway inhibitor (lipoprotein-associated coagulation inhibitor) | 3,53  |
| 28996          | HIPK2   | homeodomain interacting protein kinase 2                                       | 3,49  |
| 3690           | ITGB3   | integrin, beta 3 (platelet glycoprotein IIIa, antigen CD61)                    | 3,48  |
| 7035           | TFPI    | tissue factor pathway inhibitor (lipoprotein-associated coagulation inhibitor) | 3,45  |
| 4900           | NRGN    | neurogranin (protein kinase C substrate, RC3)                                  | 3,32  |
| 10398          | MYL9    | myosin, light chain 9, regulatory                                              | 3,22  |
| 3796           | KIF2A   | kinesin heavy chain member 2A                                                  | 3,14  |
| 5476           | CTSA    | cathepsin A                                                                    | 3,08  |
| 6648           | SOD2    | superoxide dismutase 2, mitochondrial                                          | 3,07  |
| 2982           | GUCY1A3 | guanylate cyclase 1, soluble, alpha 3                                          | 3,07  |
| 8459           | TPST2   | tyrosylprotein sulfotransferase 2                                              | 3,05  |
| 2983           | GUCY1B3 | guanylate cyclase 1, soluble, beta 3                                           | 3,04  |
| 145781         | GCOM1   | GRINL1A complex locus                                                          | 3,02  |
| 10611          | PDLIM5  | PDZ and LIM domain 5                                                           | 2,87  |
| 5567           | PRKACB  | protein kinase, cAMP-dependent, catalytic, beta                                | 2,85  |
| 25907          | TMEM158 | transmembrane protein 158 (gene/pseudogene)                                    | 2,84  |
| 8848           | TSC22D1 | TSC22 domain family, member 1                                                  | 2,83  |

|                   |                                                                                                     |      |
|-------------------|-----------------------------------------------------------------------------------------------------|------|
| 351 APP           | amyloid beta (A4) precursor protein                                                                 | 2,82 |
| 9240 PNMA1        | paraneoplastic antigen MA1                                                                          | 2,78 |
| 400073 C12orf76   | chromosome 12 open reading frame 76                                                                 | 2,78 |
| 649260 ILMN_35781 | PREDICTED: Homo sapiens similar to LIM and senescent cell antigen-like domains 1 (LOC649260), mRNA. | 2,77 |
| 8407 TAGLN2       | transgelin 2                                                                                        | 2,74 |
| 2162 F13A1        | coagulation factor XIII, A1 polypeptide                                                             | 2,74 |
| 9948 WDR1         | WD repeat domain 1                                                                                  | 2,73 |
| 81027 TUBB1       | tubulin, beta 1                                                                                     | 2,73 |
| 9848 MFAP3L       | microfibrillar-associated protein 3-like                                                            | 2,73 |
| 51257             | 2.III membrane-associated ring finger (C3HC4) 2                                                     | 2,73 |
| 25994 HIGD1A      | HIG1 hypoxia inducible domain family, member 1A                                                     | 2,71 |
| 8992 ATP6V0E1     | ATPase, H+ transporting, lysosomal 9kDa, V0 subunit e1                                              | 2,7  |
| 8545 CGGBP1       | CGG triplet repeat binding protein 1                                                                | 2,68 |
| 2017 CTTN         | cortactin                                                                                           | 2,67 |
| 5413 ILMN_139223  | Homo sapiens septin 5 (SEPT5), mRNA.                                                                | 2,64 |
| 196527 ANO6       | anoctamin 6                                                                                         | 2,62 |
| 7485 WRB          | tryptophan rich basic protein                                                                       | 2,61 |
| 222166 C7orf41    | chromosome 7 open reading frame 41                                                                  | 2,59 |
| 10079 ATP9A       | ATPase, class II, type 9A                                                                           | 2,59 |
| 2040 STOM         | stomatin                                                                                            | 2,58 |
| 58497 PRUNE       | prune homolog (Drosophila)                                                                          | 2,57 |
| 83699 ILMN_9801   | Homo sapiens SH3 domain binding glutamic acid-rich protein like 2 (SH3BGRL2), mRNA.                 | 2,56 |
| 27102 EIF2AK1     | eukaryotic translation initiation factor 2-alpha kinase 1                                           | 2,56 |
| 401629 ILMN_14074 | Homo sapiens hypothetical LOC401629 (LOC401629), non-coding RNA.                                    | 2,54 |
| 2791 GNG11        | guanine nucleotide binding protein (G protein), gamma 11                                            | 2,54 |
| 147199 SCGB1C1    | secretoglobin, family 1C, member 1                                                                  | 2,51 |
| 1998 ELF2         | E74-like factor 2 (ets domain transcription factor)                                                 | 2,5  |
| 89872 AQP10       | aquaporin 10                                                                                        | 2,49 |
| 4673 NAP1L1       | nucleosome assembly protein 1-like 1                                                                | 2,48 |
| 4638 MYLK         | myosin light chain kinase                                                                           | 2,48 |
| 3017 HIST1H2BD    | histone cluster 1, H2bd                                                                             | 2,47 |
| 643319 ILMN_41137 | PREDICTED: Homo sapiens similar to Transgelin-2 (LOC643319), mRNA.                                  | 2,44 |
| 9910 RABGAP1L     | RAB GTPase activating protein 1-like                                                                | 2,43 |

|                   |                                                                                                                                                                          |      |
|-------------------|--------------------------------------------------------------------------------------------------------------------------------------------------------------------------|------|
| 3987 LIMS1        | LIM and senescent cell antigen-like domains 1                                                                                                                            | 2,43 |
| 444 ASPH          | aspartate beta-hydroxylase                                                                                                                                               | 2,43 |
| 54498 SMOX        | spermine oxidase                                                                                                                                                         | 2,42 |
| 8349 ILMN_28293   | Homo sapiens histone cluster 2, H2be (HIST2H2BE), mRNA.                                                                                                                  | 2,42 |
| 127018 LYPLAL1    | lysophospholipase-like 1                                                                                                                                                 | 2,4  |
| 643138 ILMN_39430 | PREDICTED: Homo sapiens similar to Guanine nucleotide-binding protein G(s), alpha subunit (Adenylate cyclase-stimulating G alpha protein) (G-alpha-8) (LOC643138), mRNA. | 2,4  |
| 2108 ETFA         | electron-transfer-flavoprotein, alpha polypeptide                                                                                                                        | 2,39 |
| 54469 ZFAND6      | zinc finger, AN1-type domain 6                                                                                                                                           | 2,38 |
| 10611 PDLIM5      | PDZ and LIM domain 5                                                                                                                                                     | 2,38 |
| 401232 ILMN_11265 | Homo sapiens hypothetical protein DKFZp686I15217 (DKFZp686I15217), mRNA.                                                                                                 | 2,38 |
| 87 ACTN1          | actinin, alpha 1                                                                                                                                                         | 2,38 |
| 4052 LTBP1        | latent transforming growth factor beta binding protein 1                                                                                                                 | 2,35 |
| 79053 ALG8        | asparagine-linked glycosylation 8, alpha-1,3-glucosyltransferase homolog (S. cerevisiae)                                                                                 | 2,35 |
| 10653 SPINT2      | serine peptidase inhibitor, Kunitz type, 2                                                                                                                               | 2,33 |
| 7414 VCL          | vinculin                                                                                                                                                                 | 2,31 |
| 5889 RAD51C       | RAD51 homolog C (S. cerevisiae)                                                                                                                                          | 2,31 |
| 10826 C5orf4      | chromosome 5 open reading frame 4                                                                                                                                        | 2,3  |
| 6648 SOD2         | superoxide dismutase 2, mitochondrial                                                                                                                                    | 2,29 |
| 153768 PRELID2    | PRELI domain containing 2                                                                                                                                                | 2,29 |
| 9054 NFS1         | NFS1 nitrogen fixation 1 homolog (S. cerevisiae)                                                                                                                         | 2,29 |
| 644422 ILMN_34341 | PREDICTED: Homo sapiens misc_RNA (LOC644422), miscRNA.                                                                                                                   | 2,29 |
| 51266 CLEC1B      | C-type lectin domain family 1, member B                                                                                                                                  | 2,29 |
| 10867 TSPAN9      | tetraspanin 9                                                                                                                                                            | 2,28 |
| 3017 HIST1H2BD    | histone cluster 1, H2bd                                                                                                                                                  | 2,28 |
| 25994 HIGD1A      | HIG1 hypoxia inducible domain family, member 1A                                                                                                                          | 2,28 |
| 7057 THBS1        | thrombospondin 1                                                                                                                                                         | 2,27 |
| 5795 PTPRJ        | protein tyrosine phosphatase, receptor type, J                                                                                                                           | 2,27 |
| 441081 ILMN_36410 | PREDICTED: Homo sapiens similar to nuclear pore membrane protein 121 (LOC441081), mRNA.                                                                                  | 2,27 |
| 3987 LIMS1        | LIM and senescent cell antigen-like domains 1                                                                                                                            | 2,27 |
| 1069 CETN2        | centrin, EF-hand protein, 2                                                                                                                                              | 2,27 |
| 63933 CCDC90A     | coiled-coil domain containing 90A                                                                                                                                        | 2,27 |
| 830 CAPZA2        | capping protein (actin filament) muscle Z-line, alpha 2                                                                                                                  | 2,27 |

|                    |                                                                                                                                         |      |
|--------------------|-----------------------------------------------------------------------------------------------------------------------------------------|------|
| 5154 PDGFA         | platelet-derived growth factor alpha polypeptide                                                                                        | 2,26 |
| 9848 MFAP3L        | microfibrillar-associated protein 3-like                                                                                                | 2,24 |
| 442124 ILMN_37787  | PREDICTED: Homo sapiens hypothetical LOC442124 (LOC442124), mRNA.                                                                       | 2,24 |
| 10217 CTDSP1       | CTD (carboxy-terminal domain, RNA polymerase II, polypeptide A) small phosphatase-like                                                  | 2,23 |
| 3934 LCN2          | lipocalin 2                                                                                                                             | 2,19 |
| 340205 TREML1      | triggering receptor expressed on myeloid cells-like 1                                                                                   | 2,18 |
| 23429 RYBP         | RING1 and YY1 binding protein                                                                                                           | 2,18 |
| 80212 CCDC92       | coiled-coil domain containing 92                                                                                                        | 2,18 |
| 351 APP            | amyloid beta (A4) precursor protein                                                                                                     | 2,17 |
| 9402 GRAP2         | GRB2-related adaptor protein 2                                                                                                          | 2,15 |
| 84859 LRCH3        | leucine-rich repeats and calponin homology (CH) domain containing 3                                                                     | 2,14 |
| 222658 KCTD20      | potassium channel tetramerisation domain containing 20                                                                                  | 2,14 |
| ILMN_103084        | BX105743 NCI_CGAP_GC6 Homo sapiens cDNA clone IMAGp998H135716, mRNA sequence                                                            | 2,14 |
| 139105 ILMN_3923   | Homo sapiens chromosome X open reading frame 20 (CXorf20), mRNA.                                                                        | 2,14 |
| 3688 ITGB1         | integrin, beta 1 (fibronectin receptor, beta polypeptide, antigen CD29 includes MDF2, MSK12)                                            | 2,13 |
| 10666 CD226        | CD226 molecule                                                                                                                          | 2,13 |
| 51109 RDH11        | retinol dehydrogenase 11 (all-trans/9-cis/11-cis)                                                                                       | 2,12 |
| ILMN_105608        | AV702854 ADB Homo sapiens cDNA clone ADBCYG05 5, mRNA sequence                                                                          | 2,12 |
| 55755 CDK5RAP2     | CDK5 regulatory subunit associated protein 2                                                                                            | 2,12 |
| 54516 ILMN_182901  | Homo sapiens mitochondrial translational release factor 1-like (MTRF1L), mRNA.                                                          | 2,11 |
| 645128 ILMN_40515  | PREDICTED: Homo sapiens similar to DEAD/H (Asp-Glu-Ala-Asp/His) box polypeptide 11 isoform 1 (LOC645128), mRNA.                         | 2,1  |
| 23558 WBP2         | WW domain binding protein 2                                                                                                             | 2,09 |
| 30061 SLC40A1      | solute carrier family 40 (iron-regulated transporter), member 1                                                                         | 2,09 |
| 5742 ILMN_3001     | Homo sapiens prostaglandin-endoperoxide synthase 1 (prostaglandin G/H synthase and cyclooxygenase) (PTGS1), transcript variant 2, mRNA. | 2,09 |
| 1026 ILMN_5895     | Homo sapiens cyclin-dependent kinase inhibitor 1A (p21, Cip1) (CDKN1A), transcript variant 1, mRNA.                                     | 2,09 |
| 732424 ILMN_119261 | PREDICTED: Homo sapiens hypothetical protein LOC732424 (LOC732424), mRNA.                                                               | 2,07 |
| 391475 DYT1        | dystrotelin                                                                                                                             | 2,07 |
| 4267 CD99          | CD99 molecule                                                                                                                           | 2,07 |
| 2040 STOM          | stomatin                                                                                                                                | 2,05 |
| 64407 RGS18        | regulator of G-protein signaling 18                                                                                                     | 2,05 |
| 55132 LARP1B       | La ribonucleoprotein domain family, member 1B                                                                                           | 2,05 |

|                   |                                                                                                                              |      |
|-------------------|------------------------------------------------------------------------------------------------------------------------------|------|
| 2280 FKBP1A       | FK506 binding protein 1A, 12kDa                                                                                              | 2,05 |
| 80739 C6orf25     | chromosome 6 open reading frame 25                                                                                           | 2,05 |
| 4627 MYH9         | myosin, heavy chain 9, non-muscle                                                                                            | 2,04 |
| 5028 P2RY1        | purinergic receptor P2Y, G-protein coupled, 1                                                                                | 2,03 |
| 7456 WIPF1        | WAS/WASL interacting protein family, member 1                                                                                | 2,02 |
| 649214 ILMN_33279 | PREDICTED: Homo sapiens similar to High mobility group protein 1-like 10 (HMG-1L10), transcript variant 4 (LOC649214), mRNA. | 2,02 |
| ILMN_97811        | AV762101 MDS Homo sapiens cDNA clone MDSEOA03 5, mRNA sequence                                                               | 2,02 |
| 643752 RAP1BL     | RAP1B, member of RAS oncogene family pseudogene                                                                              | 2    |
| 644799 ILMN_43702 | PREDICTED: Homo sapiens hypothetical protein LOC644799, transcript variant 1 (LOC644799), mRNA.                              | 2    |
| 51706 CYB5R1      | cytochrome b5 reductase 1                                                                                                    | 1,99 |
| 9556 C14orf2      | chromosome 14 open reading frame 2                                                                                           | 1,99 |
| 23531 MMD         | monocyte to macrophage differentiation-associated                                                                            | 1,98 |
| 10938 EHD1        | EH-domain containing 1                                                                                                       | 1,98 |
| 3013 HIST1H2AD    | histone cluster 1, H2ad                                                                                                      | 1,97 |
| 6117 RPA1         | replication protein A1, 70kDa                                                                                                | 1,96 |
| 54741 ILMN_27032  | Homo sapiens leptin receptor overlapping transcript (LEPROT), mRNA.                                                          | 1,96 |
| 10049 DNAJB6      | DnaJ (Hsp40) homolog, subfamily B, member 6                                                                                  | 1,96 |
| 5196 ILMN_16715   | Homo sapiens platelet factor 4 (chemokine (C-X-C motif) ligand 4) (PF4), mRNA.                                               | 1,95 |
| ILMN_88180        | ir56a05.y1 HR85 islet Homo sapiens cDNA clone IMAGE:6549201 5, mRNA sequence                                                 | 1,95 |
| 644162 ILMN_43225 | PREDICTED: Homo sapiens similar to septin 7, transcript variant 4 (LOC644162), mRNA.                                         | 1,94 |
| 4638 MYLK         | myosin light chain kinase                                                                                                    | 1,93 |
| 351 APP           | amyloid beta (A4) precursor protein                                                                                          | 1,93 |
| 5874 RAB27B       | RAB27B, member RAS oncogene family                                                                                           | 1,92 |
| 9588 PRDX6        | peroxiredoxin 6                                                                                                              | 1,92 |
| 83658 DYNLRB1     | dynein, light chain, roadblock-type 1                                                                                        | 1,92 |
| 83700 JAM3        | junctional adhesion molecule 3                                                                                               | 1,91 |
| 6374 CXCL5        | chemokine (C-X-C motif) ligand 5                                                                                             | 1,91 |
| 5197 PF4V1        | platelet factor 4 variant 1                                                                                                  | 1,9  |
| 10000 AKT3        | v-akt murine thymoma viral oncogene homolog 3 (protein kinase B, gamma)                                                      | 1,9  |
| 9445 ITM2B        | integral membrane protein 2B                                                                                                 | 1,89 |
| 5087 PBX1         | pre-B-cell leukemia homeobox 1                                                                                               | 1,88 |
| 55353 LAPTM4B     | lysosomal protein transmembrane 4 beta                                                                                       | 1,88 |

|                    |                                                                                                                                                                          |      |
|--------------------|--------------------------------------------------------------------------------------------------------------------------------------------------------------------------|------|
| 2811 GP1BA         | glycoprotein Ib (platelet), alpha polypeptide                                                                                                                            | 1,88 |
| 653061 ILMN_40836  | PREDICTED: Homo sapiens similar to golgi autoantigen, golgin subfamily a, 8A (LOC653061), mRNA.                                                                          | 1,87 |
| ILMN_93150         | UI-H-EU0-azk-k-10-0-UI.s1 NCI_CGAP_Car1 Homo sapiens cDNA clone IMAGE: 5849985 3, mRNA sequence                                                                          | 1,87 |
| 2149 ILMN_25961    | Homo sapiens coagulation factor II (thrombin) receptor (F2R), mRNA.                                                                                                      | 1,87 |
| 80790 ILMN_13851   | Homo sapiens c-Maf-inducing protein (CMIP), transcript variant Tc-mip, mRNA.                                                                                             | 1,87 |
| 5305 PIP4K2A       | phosphatidylinositol-5-phosphate 4-kinase, type II, alpha                                                                                                                | 1,86 |
| 375033 ILMN_170351 | Homo sapiens platelet endothelial aggregation receptor 1 (PEAR1), mRNA.                                                                                                  | 1,86 |
| 3688 ITGB1         | integrin, beta 1 (fibronectin receptor, beta polypeptide, antigen CD29 includes MDF2, MSK12)                                                                             | 1,86 |
| 84771 ILMN_42231   | PREDICTED: Homo sapiens hypothetical protein MGC13005 (MGC13005), mRNA.                                                                                                  | 1,84 |
| 644336 ILMN_44408  | PREDICTED: Homo sapiens similar to SET domain and mariner transposase fusion gene (LOC644336), mRNA.                                                                     | 1,84 |
| 79647 AKIRIN1      | akirin 1                                                                                                                                                                 | 1,84 |
| 3987 ILMN_139143   | PREDICTED: Homo sapiens LIM and senescent cell antigen-like domains 1 (LIMS1), mRNA.                                                                                     | 1,83 |
| 7414 VCL           | vinculin                                                                                                                                                                 | 1,82 |
| 648057 ILMN_32589  | PREDICTED: Homo sapiens similar to Guanine nucleotide-binding protein G(s), alpha subunit (Adenylate cyclase-stimulating G alpha protein) (G-alpha-8) (LOC648057), mRNA. | 1,82 |
| 643451 ILMN_31270  | PREDICTED: Homo sapiens hypothetical protein LOC643451 (LOC643451), mRNA.                                                                                                | 1,81 |
| 25932 CLIC4        | chloride intracellular channel 4                                                                                                                                         | 1,81 |
| 9628 RGS6          | regulator of G-protein signaling 6                                                                                                                                       | 1,8  |
| 8440 NCK2          | NCK adaptor protein 2                                                                                                                                                    | 1,8  |
| 27257 LSM1         | LSM1 homolog, U6 small nuclear RNA associated (S. cerevisiae)                                                                                                            | 1,8  |
| 83658 DYNLRB1      | dynein, light chain, roadblock-type 1                                                                                                                                    | 1,8  |
| 30850 CDR2L        | cerebellar degeneration-related protein 2-like                                                                                                                           | 1,8  |
| 25893 TRIM58       | tripartite motif containing 58                                                                                                                                           | 1,79 |
| 653635 ILMN_42161  | PREDICTED: Homo sapiens similar to CXYorf1-related protein (LOC653635), mRNA.                                                                                            | 1,79 |
| 8655 DYNLL1        | dynein, light chain, LC8-type 1                                                                                                                                          | 1,79 |
| 401232 ILMN_11265  | Homo sapiens hypothetical protein DKFZp686I15217 (DKFZp686I15217), mRNA.                                                                                                 | 1,79 |
| 51643 TMBIM4       | transmembrane BAX inhibitor motif containing 4                                                                                                                           | 1,78 |
| 326624 RAB37       | RAB37, member RAS oncogene family                                                                                                                                        | 1,78 |
| 23299 BICD2        | bicaudal D homolog 2 (Drosophila)                                                                                                                                        | 1,78 |
| 94121 SYTL4        | synaptotagmin-like 4                                                                                                                                                     | 1,77 |
| 91624 NEXN         | nexilin (F actin binding protein)                                                                                                                                        | 1,77 |
| 4149 MAX           | MYC associated factor X                                                                                                                                                  | 1,77 |
| 79742 CXorf36      | chromosome X open reading frame 36                                                                                                                                       | 1,77 |

|        |             |                                                                                                                              |      |
|--------|-------------|------------------------------------------------------------------------------------------------------------------------------|------|
| 643253 | CCT6P1      | chaperonin containing TCP1, subunit 6 (zeta) pseudogene 1                                                                    | 1,77 |
| 54498  | SMOX        | spermine oxidase                                                                                                             | 1,76 |
| 10169  | SERF2       | small EDRK-rich factor 2                                                                                                     | 1,76 |
| 5579   | PRKCB       | protein kinase C, beta                                                                                                       | 1,76 |
| 5552   | SRGN        | serglycin                                                                                                                    | 1,75 |
| 644380 | ILMN_36938  | PREDICTED: Homo sapiens similar to High mobility group protein 1-like 10 (HMG-1L10), transcript variant 1 (LOC644380), mRNA. | 1,75 |
| 148823 | ILMN_22220  | Homo sapiens chromosome 1 open reading frame 150 (C1orf150), mRNA.                                                           | 1,74 |
| 54470  | ILMN_6931   | Homo sapiens armadillo repeat containing, X-linked 6 (ARMCX6), transcript variant 1, mRNA.                                   | 1,74 |
| 64795  | RMND5A      | required for meiotic nuclear division 5 homolog A (S. cerevisiae)                                                            | 1,73 |
| 51251  | NT5C3       | 5'-nucleotidase, cytosolic III                                                                                               | 1,73 |
| 10398  | MYL9        | myosin, light chain 9, regulatory                                                                                            | 1,73 |
| 7326   | UBE2G1      | ubiquitin-conjugating enzyme E2G 1                                                                                           | 1,72 |
| 4627   | MYH9        | myosin, heavy chain 9, non-muscle                                                                                            | 1,72 |
| 4149   | MAX         | MYC associated factor X                                                                                                      | 1,72 |
| 9764   | KIAA0513    | KIAA0513                                                                                                                     | 1,72 |
| 2876   | ILMN_10376  | Homo sapiens glutathione peroxidase 1 (GPX1), transcript variant 2, mRNA.                                                    | 1,72 |
| 83706  | FERMT3      | fermitin family member 3                                                                                                     | 1,72 |
| 55281  | TMEM140     | transmembrane protein 140                                                                                                    | 1,71 |
| 30061  | SLC40A1     | solute carrier family 40 (iron-regulated transporter), member 1                                                              | 1,71 |
| 64805  | P2RY12      | purinergic receptor P2Y, G-protein coupled, 12                                                                               | 1,7  |
| 387820 | ILMN_26714  | PREDICTED: Homo sapiens similar to DnaJ (Hsp40) homolog, subfamily B, member 6 isoform a (LOC387820), mRNA.                  | 1,7  |
| 3988   | LIPA        | lipase A, lysosomal acid, cholesterol esterase                                                                               | 1,7  |
| 283777 | FAM169B     | family with sequence similarity 169, member B                                                                                | 1,7  |
| 64114  | TMBIM1      | transmembrane BAX inhibitor motif containing 1                                                                               | 1,69 |
| 8436   | SDPR        | serum deprivation response                                                                                                   | 1,67 |
| 642707 | ILMN_43996  | PREDICTED: Homo sapiens similar to Hornerin (LOC642707), mRNA.                                                               | 1,67 |
| 5867   | ILMN_14453  | Homo sapiens RAB4A, member RAS oncogene family (RAB4A), mRNA.                                                                | 1,66 |
| 5816   | PVALB       | parvalbumin                                                                                                                  | 1,66 |
|        | ILMN_125202 | IL2-NT0102-160600-105-C03 NT0102 Homo sapiens cDNA, mRNA sequence                                                            | 1,66 |
| 26052  | DNM3        | dynammin 3                                                                                                                   | 1,66 |
| 84913  | ATOH8       | atonal homolog 8 (Drosophila)                                                                                                | 1,66 |
| 56897  | WRNIP1      | Werner helicase interacting protein 1                                                                                        | 1,65 |

|                   |                                                                                                                                                    |      |
|-------------------|----------------------------------------------------------------------------------------------------------------------------------------------------|------|
| 651361 ILMN_35263 | PREDICTED: Homo sapiens similar to S-phase kinase-associated protein 1A (Cyclin A/CDK2-associated protein p19) (p19A) (p19skp1) (LOC651361), mRNA. | 1,65 |
| 10477 UBE2E3      | ubiquitin-conjugating enzyme E2E 3                                                                                                                 | 1,64 |
| 8655 DYNLL1       | dynein, light chain, LC8-type 1                                                                                                                    | 1,64 |
| 136319 MTPN       | myotrophin                                                                                                                                         | 1,63 |
| 8417 STX7         | syntaxin 7                                                                                                                                         | 1,62 |
| 4218 RAB8A        | RAB8A, member RAS oncogene family                                                                                                                  | 1,61 |
| 3580 ILMN_139000  | PREDICTED: Homo sapiens interleukin 8 receptor, beta pseudogene (IL8RBP), misc RNA.                                                                | 1,61 |
| 55294 FBXW7       | F-box and WD repeat domain containing 7                                                                                                            | 1,61 |
| 6352 CCL5         | chemokine (C-C motif) ligand 5                                                                                                                     | 1,61 |
| 27018 NGFRAP1     | nerve growth factor receptor (TNFRSF16) associated protein 1                                                                                       | 1,6  |
| 4354 MPP1         | membrane protein, palmitoylated 1, 55kDa                                                                                                           | 1,6  |
| 3693 ITGB5        | integrin, beta 5                                                                                                                                   | 1,6  |
| 84548 TMEM185A    | transmembrane protein 185A                                                                                                                         | 1,59 |
| 80230 RUFY1       | RUN and FYVE domain containing 1                                                                                                                   | 1,59 |
| 55796 MBNL3       | muscleblind-like 3 (Drosophila)                                                                                                                    | 1,59 |
| 647958 ILMN_31883 | PREDICTED: Homo sapiens similar to SET domain and mariner transposase fusion gene (LOC647958), mRNA.                                               | 1,59 |
| 3146 HMGB1        | high mobility group box 1                                                                                                                          | 1,59 |
| 9445 ITM2B        | integral membrane protein 2B                                                                                                                       | 1,58 |
| ILMN_86463        | RST15665 Athersys RAGE Library Homo sapiens cDNA, mRNA sequence                                                                                    | 1,58 |
| 64423 INF2        | inverted formin, FH2 and WH2 domain containing                                                                                                     | 1,58 |
| 51646 YPEL5       | yippee-like 5 (Drosophila)                                                                                                                         | 1,57 |
| 51251 NT5C3       | 5'-nucleotidase, cytosolic III                                                                                                                     | 1,57 |
| 64747 MFSD1       | major facilitator superfamily domain containing 1                                                                                                  | 1,57 |
| 2664 ILMN_13492   | Homo sapiens GDP dissociation inhibitor 1 (GDI1), mRNA.                                                                                            | 1,57 |
| 3953 LEPR         | leptin receptor                                                                                                                                    | 1,56 |
| 1523 CUX1         | cut-like homeobox 1                                                                                                                                | 1,56 |
| 56344 CABP5       | calcium binding protein 5                                                                                                                          | 1,56 |
| 5494 PPM1A        | protein phosphatase, Mg <sup>2+</sup> /Mn <sup>2+</sup> dependent, 1A                                                                              | 1,55 |
| 651022 ILMN_31551 | PREDICTED: Homo sapiens hypothetical protein LOC651022 (LOC651022), mRNA.                                                                          | 1,55 |
| 8328 GFI1B        | growth factor independent 1B transcription repressor                                                                                               | 1,55 |
| 9465 AKAP7        | A kinase (PRKA) anchor protein 7                                                                                                                   | 1,55 |
| 5627 PROS1        | protein S (alpha)                                                                                                                                  | 1,54 |



|                   |                                                                                                                                     |      |
|-------------------|-------------------------------------------------------------------------------------------------------------------------------------|------|
| 5577 PRKAR2B      | protein kinase, cAMP-dependent, regulatory, type II, beta                                                                           | 1,54 |
| 650263 ILMN_46692 | PREDICTED: Homo sapiens hypothetical protein LOC650263 (LOC650263), mRNA.                                                           | 1,54 |
| 8339 HIST1H2BG    | histone cluster 1, H2bg                                                                                                             | 1,54 |
| 1727 CYB5R3       | cytochrome b5 reductase 3                                                                                                           | 1,54 |
| 6397 SEC14L1      | SEC14-like 1 ( <i>S. cerevisiae</i> )                                                                                               | 1,53 |
| 10158 PDZK1IP1    | PDZK1 interacting protein 1                                                                                                         | 1,53 |
| 11315 PARK7       | parkinson protein 7                                                                                                                 | 1,53 |
| 3987 LIMS1        | LIM and senescent cell antigen-like domains 1                                                                                       | 1,53 |
| 7504 XK           | X-linked Kx blood group (McLeod syndrome)                                                                                           | 1,52 |
| 8654 PDE5A        | phosphodiesterase 5A, cGMP-specific                                                                                                 | 1,52 |
| 123803 NTAN1      | N-terminal asparagine amidase                                                                                                       | 1,52 |
| 440917 LOC440917  | tyrosine 3-monooxygenase/tryptophan 5-monooxygenase activation protein, epsilon polypeptide pseudogene                              | 1,52 |
| 27292 DIMT1       | DIM1 dimethyladenosine transferase 1 homolog ( <i>S. cerevisiae</i> )                                                               | 1,52 |
| 400804 ILMN_29977 | Homo sapiens chromosome 1 open reading frame 140 (C1orf140), mRNA.                                                                  | 1,52 |
| 7533 YWHAH        | tyrosine 3-monooxygenase/tryptophan 5-monooxygenase activation protein, eta polypeptide                                             | 1,51 |
| 5782 PTPN12       | protein tyrosine phosphatase, non-receptor type 12                                                                                  | 1,51 |
| 389787 LOC389787  | tumor protein, translationally-controlled 1 pseudogene                                                                              | 1,51 |
| 10357 HMGB1P1     | high mobility group box 1 pseudogene 1                                                                                              | 1,51 |
| 395 ARHGAP6       | Rho GTPase activating protein 6                                                                                                     | 1,51 |
| 84519 ACRBP       | acrosin binding protein                                                                                                             | 1,51 |
| 340348 TSPAN33    | tetraspanin 33                                                                                                                      | 1,5  |
| 6648 ILMN_19880   | Homo sapiens superoxide dismutase 2, mitochondrial (SOD2), nuclear gene encoding mitochondrial protein, transcript variant 1, mRNA. | 1,5  |
| ILMN_81934        | UI-H-DF1-auk-p-10-0-UI.s1 NCI_CGAP_DF1 Homo sapiens cDNA clone IMAGE:5870841 3, mRNA sequence                                       | 1,5  |
| 8345 HIST1H2BH    | histone cluster 1, H2bh                                                                                                             | 1,5  |
| 7076 TIMP1        | TIMP metalloproteinase inhibitor 1                                                                                                  | 1,49 |
| ILMN_111407       | xb22e11.x1 NCI_CGAP_Kid13 Homo sapiens cDNA clone IMAGE:2577068 3, mRNA sequence                                                    | 1,49 |
| 9455 HOMER2       | homer homolog 2 ( <i>Drosophila</i> )                                                                                               | 1,49 |
| 3081 HGD          | homogentisate 1,2-dioxygenase                                                                                                       | 1,49 |
| 55845 BRK1        | BRICK1, SCAR/WAVE actin-nucleating complex subunit                                                                                  | 1,49 |
| 6748 SSR4         | signal sequence receptor, delta                                                                                                     | 1,48 |
| 5911 RAP2A        | RAP2A, member of RAS oncogene family                                                                                                | 1,48 |
| 3572 IL6ST        | interleukin 6 signal transducer (gp130, oncostatin M receptor)                                                                      | 1,48 |

|                   |                                                                                                                                          |      |
|-------------------|------------------------------------------------------------------------------------------------------------------------------------------|------|
| 56911 C21orf7     | chromosome 21 open reading frame 7                                                                                                       | 1,48 |
| 7531 YWHAЕ        | tyrosine 3-monooxygenase/tryptophan 5-monooxygenase activation protein, epsilon polypeptide                                              | 1,47 |
| ILMN_72868        | TCAAP1D4752 Pediatric acute myelogenous leukemia cell (FAB M1) Baylor-HGSC project=TCAA Homo sapiens cDNA clone TCAAP4752, mRNA sequence | 1,47 |
| 2280 FKBP1A       | FK506 binding protein 1A, 12kDa                                                                                                          | 1,47 |
| 11235 PDCD10      | programmed cell death 10                                                                                                                 | 1,46 |
| 4154 MBNL1        | muscleblind-like (Drosophila)                                                                                                            | 1,46 |
| 257019 FRMD3      | FERM domain containing 3                                                                                                                 | 1,46 |
| 6500 SKP1         | S-phase kinase-associated protein 1                                                                                                      | 1,45 |
| 10929 SRSF8       | serine/arginine-rich splicing factor 8                                                                                                   | 1,45 |
| 58508 MLL3        | myeloid/lymphoid or mixed-lineage leukemia 3                                                                                             | 1,45 |
| ILMN_110914       | BX429982 Homo sapiens FETAL LIVER Homo sapiens cDNA clone CS0DM002YI05 5-PRIME, mRNA sequence                                            | 1,45 |
| 112495 GTF3C6     | general transcription factor IIIC, polypeptide 6, alpha 35kDa                                                                            | 1,45 |
| 488 ILMN_19965    | Homo sapiens ATPase, Ca++ transporting, cardiac muscle, slow twitch 2 (ATP2A2), transcript variant 1, mRNA.                              | 1,45 |
| 54470 ARMCX6      | armadillo repeat containing, X-linked 6                                                                                                  | 1,45 |
| 7168 TPM1         | tropomyosin 1 (alpha)                                                                                                                    | 1,44 |
| 6419 ILMN_17510   | Homo sapiens SET domain and mariner transposase fusion gene (SETMAR), mRNA.                                                              | 1,44 |
| 8780 RIOK3        | RIO kinase 3 (yeast)                                                                                                                     | 1,44 |
| 8766 RAB11A       | RAB11A, member RAS oncogene family                                                                                                       | 1,44 |
| 2026 ENO2         | enolase 2 (gamma, neuronal)                                                                                                              | 1,44 |
| 22885 ABLIM3      | actin binding LIM protein family, member 3                                                                                               | 1,44 |
| 6399 TRAPPC2      | trafficking protein particle complex 2                                                                                                   | 1,43 |
| 8714 ILMN_8120    | Homo sapiens ATP-binding cassette, sub-family C (CFTR/MRP), member 3 (ABCC3), mRNA.                                                      | 1,43 |
| 8848 TSC22D1      | TSC22 domain family, member 1                                                                                                            | 1,42 |
| 8848 TSC22D1      | TSC22 domain family, member 1                                                                                                            | 1,42 |
| 6117 RPA1         | replication protein A1, 70kDa                                                                                                            | 1,42 |
| 326624 ILMN_10097 | Homo sapiens RAB37, member RAS oncogene family (RAB37), transcript variant 1, mRNA.                                                      | 1,42 |
| 326624 RAB37      | RAB37, member RAS oncogene family                                                                                                        | 1,42 |
| 652271 ILMN_37313 | PREDICTED: Homo sapiens similar to N-acylsphingosine amidohydrolase 2 (LOC652271), mRNA.                                                 | 1,42 |
| 81689 ISCA1       | iron-sulfur cluster assembly 1 homolog (S. cerevisiae)                                                                                   | 1,42 |
| 9923 ZBTB40       | zinc finger and BTB domain containing 40                                                                                                 | 1,41 |
| 5552 SRGN         | serglycin                                                                                                                                | 1,41 |
| 113230 ILMN_33629 | PREDICTED: Homo sapiens hypothetical protein LOC113230 (LOC113230), mRNA.                                                                | 1,41 |

|                   |                                                                                                        |      |
|-------------------|--------------------------------------------------------------------------------------------------------|------|
| 3688 ITGB1        | integrin, beta 1 (fibronectin receptor, beta polypeptide, antigen CD29 includes MDF2, MSK12)           | 1,41 |
| ILMN_96170        | ny42b04.s1 NCI_CGAP_Pr12 Homo sapiens cDNA clone IMAGE:1274383, mRNA sequence                          | 1,41 |
| 6374 CXCL5        | chemokine (C-X-C motif) ligand 5                                                                       | 1,41 |
| 80025 PANK2       | pantothenate kinase 2                                                                                  | 1,4  |
| 2768 GNA12        | guanine nucleotide binding protein (G protein) alpha 12                                                | 1,4  |
| 10152 ABI2        | abl-interactor 2                                                                                       | 1,4  |
| 10857 PGRMC1      | progesterone receptor membrane component 1                                                             | 1,39 |
| 1200 ILMN_19883   | Homo sapiens tripeptidyl peptidase I (TPP1), mRNA.                                                     | 1,38 |
| 55529 TMEM55A     | transmembrane protein 55A                                                                              | 1,38 |
| 6757 ILMN_163873  | Homo sapiens synovial sarcoma, X breakpoint 2 (SSX2), transcript variant 1, mRNA.                      | 1,38 |
| 8773 SNAP23       | synaptosomal-associated protein, 23kDa                                                                 | 1,38 |
| 8654 PDE5A        | phosphodiesterase 5A, cGMP-specific                                                                    | 1,38 |
| ILMN_128554       | CR748447 Soares_testis_NHT Homo sapiens cDNA clone IMAGp97111175 ; IMAGE:1738834 5, mRNA sequence      | 1,38 |
| ILMN_79152        | xj44f04.x1 Soares_NFL_T_GBC_S1 Homo sapiens cDNA clone IMAGE:2660095 3, mRNA sequence                  | 1,38 |
| 4953 ODC1         | ornithine decarboxylase 1                                                                              | 1,37 |
| 4130 MAP1A        | microtubule-associated protein 1A                                                                      | 1,37 |
| 653226 ILMN_39856 | PREDICTED: Homo sapiens similar to Signal recognition particle 9 kDa protein (SRP9) (LOC653226), mRNA. | 1,37 |
| 29094 LGALS1      | lectin, galactoside-binding-like                                                                       | 1,37 |
| 2766 GMPR         | guanosine monophosphate reductase                                                                      | 1,37 |
| 50848 F11R        | F11 receptor                                                                                           | 1,36 |
| 649395 LOC649395  | tyrosine 3-monooxygenase/tryptophan 5-monooxygenase activation protein, epsilon polypeptide pseudogene | 1,35 |
| 6714 SRC          | v-src sarcoma (Schmidt-Ruppin A-2) viral oncogene homolog (avian)                                      | 1,35 |
| 8773 SNAP23       | synaptosomal-associated protein, 23kDa                                                                 | 1,35 |
| 56950 SMYD2       | SET and MYND domain containing 2                                                                       | 1,35 |
| 6403 SELP         | selectin P (granule membrane protein 140kDa, antigen CD62)                                             | 1,35 |
| 2778 GNAS         | GNAS complex locus                                                                                     | 1,35 |
| 1729 DIAPH1       | diaphanous homolog 1 (Drosophila)                                                                      | 1,35 |
| 8804 CREG1        | cellular repressor of E1A-stimulated genes 1                                                           | 1,35 |
| 760 CA2           | carbonic anhydrase II                                                                                  | 1,35 |
| 444 ASPH          | aspartate beta-hydroxylase                                                                             | 1,35 |
| 7168 TPM1         | tropomyosin 1 (alpha)                                                                                  | 1,34 |
| 26994 RNF11       | ring finger protein 11                                                                                 | 1,34 |
| 4149 MAX          | MYC associated factor X                                                                                | 1,34 |

|        |             |                                                                                                                                 |      |
|--------|-------------|---------------------------------------------------------------------------------------------------------------------------------|------|
| 2867   | FFAR2       | free fatty acid receptor 2                                                                                                      | 1,34 |
| 83658  | DYNLRB1     | dynein, light chain, roadblock-type 1                                                                                           | 1,34 |
| 29797  | ILMN_28495  | Homo sapiens hypothetical protein DKFZp434K191 (DKFZp434K191), mRNA.                                                            | 1,34 |
| 6881   | TAF10       | TAF10 RNA polymerase II, TATA box binding protein (TBP)-associated factor, 30kDa                                                | 1,33 |
| 8935   | SKAP2       | src kinase associated phosphoprotein 2                                                                                          | 1,33 |
| 387590 | ILMN_12454  | Homo sapiens TPTE pseudogene (psiTPTE22), non-coding RNA.                                                                       | 1,33 |
| 55898  | UNC45A      | unc-45 homolog A (C. elegans)                                                                                                   | 1,32 |
| 9978   | RBX1        | ring-box 1, E3 ubiquitin protein ligase                                                                                         | 1,32 |
| 9124   | PDLIM1      | PDZ and LIM domain 1                                                                                                            | 1,32 |
| 400073 | C12orf76    | chromosome 12 open reading frame 76                                                                                             | 1,32 |
| 6006   | RHCE        | Rh blood group, CcEe antigens                                                                                                   | 1,31 |
| 54551  | MAGEL2      | MAGE-like 2                                                                                                                     | 1,31 |
| 643713 | ILMN_40960  | PREDICTED: Homo sapiens hypothetical protein LOC643713 (LOC643713), mRNA.                                                       | 1,31 |
| 977    | ILMN_44841  | Homo sapiens CD151 molecule (Raph blood group) (CD151), transcript variant 2, mRNA.                                             | 1,31 |
| 6868   | ILMN_165100 | Homo sapiens ADAM metalloproteinase domain 17 (ADAM17), mRNA.                                                                   | 1,31 |
| 6774   | STAT3       | signal transducer and activator of transcription 3 (acute-phase response factor)                                                | 1,3  |
| 644436 | ILMN_42336  | PREDICTED: Homo sapiens similar to Tubulin alpha-4 chain (Alpha-tubulin 4) (Alpha-tubulin isotype M-alpha-4) (LOC644436), mRNA. | 1,3  |
|        | ILMN_111904 | UI-CF-DU1-aay-b-22-18-UI.s18 UI-CF-DU1 Homo sapiens cDNA clone UI-CF-DU1-aay-b-22-18-UI 3, mRNA sequence                        | 1,3  |
| 408    | ARRB1       | arrestin, beta 1                                                                                                                | 1,3  |
| 57187  | THOC2       | THO complex 2                                                                                                                   | 1,29 |
|        | ILMN_107341 | PM3-LT0032-090100-008-f10 LT0032 Homo sapiens cDNA, mRNA sequence                                                               | 1,29 |
| 22920  | KIFAP3      | kinesin-associated protein 3                                                                                                    | 1,28 |
|        | ILMN_125302 | RST26545 Athersys RAGE Library Homo sapiens cDNA, mRNA sequence                                                                 | 1,28 |
| 1122   | CHML        | choroideremia-like (Rab escort protein 2)                                                                                       | 1,28 |
| 10095  | ARPC1B      | actin related protein 2/3 complex, subunit 1B, 41kDa                                                                            | 1,28 |
| 55122  | AKIRIN2     | akirin 2                                                                                                                        | 1,28 |
| 117177 | ILMN_41802  | Homo sapiens RAB3A interacting protein (rabin3) (RAB3IP), transcript variant A, mRNA.                                           | 1,27 |
| 728127 | ILMN_46425  | PREDICTED: Homo sapiens similar to centaurin, gamma-like family, member 1 (LOC728127), mRNA.                                    | 1,27 |
| 388555 | ILMN_17801  | Homo sapiens IGF-like family member 3 (IGFL3), mRNA.                                                                            | 1,27 |
| 440712 | ILMN_20193  | Homo sapiens chromosome 1 open reading frame 186 (C1orf186), mRNA.                                                              | 1,27 |
| 137492 | VPS37A      | vacuolar protein sorting 37 homolog A (S. cerevisiae)                                                                           | 1,26 |
| 140739 | UBE2F       | ubiquitin-conjugating enzyme E2F (putative)                                                                                     | 1,26 |

|                   |                                                                                                                                         |      |
|-------------------|-----------------------------------------------------------------------------------------------------------------------------------------|------|
| 641649 TMEM91     | transmembrane protein 91                                                                                                                | 1,26 |
| 27020 NPTN        | neuroplastin                                                                                                                            | 1,26 |
| 143666 ILMN_28031 | PREDICTED: Homo sapiens hypothetical protein LOC143666 (LOC143666), mRNA.                                                               | 1,26 |
| ILMN_118124       | BP395220 Homo sapiens pancreatic islet Homo sapiens cDNA clone hbt03885 3, mRNA sequence                                                | 1,26 |
| 8365 HIST1H4H     | histone cluster 1, H4h                                                                                                                  | 1,26 |
| 7064 THOP1        | thimet oligopeptidase 1                                                                                                                 | 1,25 |
| 643154 ILMN_38879 | PREDICTED: Homo sapiens hypothetical protein LOC643154 (LOC643154), mRNA.                                                               | 1,25 |
| 7456 WIPF1        | WAS/WASL interacting protein family, member 1                                                                                           | 1,24 |
| 27040 LAT         | linker for activation of T cells                                                                                                        | 1,24 |
| ILMN_105596       | hd01g11.x1 Soares_NFL_T_GBC_S1 Homo sapiens cDNA clone IMAGE:2908292 3 similar to contains L1.t2 L1 repetitive element ;, mRNA sequence | 1,24 |
| 2820 GPD2         | glycerol-3-phosphate dehydrogenase 2 (mitochondrial)                                                                                    | 1,24 |
| 7292 TNFSF4       | tumor necrosis factor (ligand) superfamily, member 4                                                                                    | 1,23 |
| 8926 ILMN_15998   | Homo sapiens SNRPN upstream reading frame (SNURF), transcript variant 1, mRNA.                                                          | 1,23 |
| 5494 PPM1A        | protein phosphatase, Mg2+/Mn2+ dependent, 1A                                                                                            | 1,23 |
| 25915 NDUFAF3     | NADH dehydrogenase (ubiquinone) 1 alpha subcomplex, assembly factor 3                                                                   | 1,23 |
| 4154 MBNL1        | muscleblind-like (Drosophila)                                                                                                           | 1,23 |
| ILMN_89656        | yz74c09.s1 Soares_multiple_sclerosis_2NbHMSP Homo sapiens cDNA clone IMAGE:288784 3, mRNA sequence                                      | 1,23 |
| 2207 FCER1G       | Fc fragment of IgE, high affinity I, receptor for; gamma polypeptide                                                                    | 1,23 |
| 7401 CLRN1        | clarin 1                                                                                                                                | 1,23 |
| 1071 CETP         | cholesteryl ester transfer protein, plasma                                                                                              | 1,23 |
| 51538 ZCCHC17     | zinc finger, CCHC domain containing 17                                                                                                  | 1,22 |
| 6683 SPAST        | spastin                                                                                                                                 | 1,22 |
| 6478 SIAH2        | seven in absentia homolog 2 (Drosophila)                                                                                                | 1,22 |
| 5110 PCMT1        | protein-L-isoaspartate (D-aspartate) O-methyltransferase                                                                                | 1,22 |
| 642489 ILMN_37913 | PREDICTED: Homo sapiens similar to FK506-binding protein 1A (LOC642489), mRNA.                                                          | 1,22 |
| 3549 IHH          | Indian hedgehog                                                                                                                         | 1,22 |
| 2500 ILMN_16099   | Homo sapiens ferritin, heavy polypeptide-like 7 (FTHL7) on chromosome 13.                                                               | 1,22 |
| 574 ILMN_10365    | Homo sapiens B melanoma antigen (BAGE), mRNA.                                                                                           | 1,22 |
| ILMN_71879        | Homo sapiens cDNA clone IMAGE:5297467                                                                                                   | 1,21 |
| 143279 ILMN_23234 | Homo sapiens HECT domain containing 2 (HECTD2), transcript variant 2, mRNA.                                                             | 1,21 |
| 6451 SH3BGR1      | SH3 domain binding glutamic acid-rich protein like                                                                                      | 1,2  |
| 5567 PRKACB       | protein kinase, cAMP-dependent, catalytic, beta                                                                                         | 1,2  |

|        |             |                                                                                                                      |      |
|--------|-------------|----------------------------------------------------------------------------------------------------------------------|------|
| 4917   | NTN3        | netrin 3                                                                                                             | 1,2  |
| 112597 | ILMN_137135 | Homo sapiens hypothetical protein MGC4677 (MGC4677), mRNA.                                                           | 1,2  |
|        | ILMN_90731  | UI-H-FG0-bcw-h-18-0-UI.s1 NCI_CGAP_EN1_2 Homo sapiens cDNA clone UI-H-FG0-bcw-h-18-0-UI 3, mRNA sequence             | 1,2  |
| 4735   | 2.IX        | septin 2                                                                                                             | 1,19 |
| 644010 | ILMN_41564  | PREDICTED: Homo sapiens hypothetical LOC644010, transcript variant 2 (LOC644010), mRNA.                              | 1,19 |
| 85236  | HIST1H2BK   | histone cluster 1, H2bk                                                                                              | 1,19 |
| 8344   | HIST1H2BE   | histone cluster 1, H2be                                                                                              | 1,19 |
| 2869   | GRK5        | G protein-coupled receptor kinase 5                                                                                  | 1,19 |
| 219771 | CCNY        | cyclin Y                                                                                                             | 1,19 |
| 896    | CCND3       | cyclin D3                                                                                                            | 1,19 |
| 1175   | AP2S1       | adaptor-related protein complex 2, sigma 1 subunit                                                                   | 1,19 |
| 93650  | ACPT        | acid phosphatase, testicular                                                                                         | 1,19 |
| 7511   | XPNPEP1     | X-prolyl aminopeptidase (aminopeptidase P) 1, soluble                                                                | 1,18 |
| 5257   | PHKB        | phosphorylase kinase, beta                                                                                           | 1,18 |
| 651589 | ILMN_32438  | PREDICTED: Homo sapiens similar to SET domain and mariner transposase fusion gene (LOC651589), mRNA.                 | 1,18 |
| 644322 | ILMN_34524  | PREDICTED: Homo sapiens similar to Ribosome biogenesis protein BMS1 homolog, transcript variant 2 (LOC644322), mRNA. | 1,18 |
| 22876  | INPP5F      | inositol polyphosphate-5-phosphatase F                                                                               | 1,18 |
| 3133   | HLA-E       | major histocompatibility complex, class I, E                                                                         | 1,18 |
| 8324   | FZD7        | frizzled family receptor 7                                                                                           | 1,18 |
| 29940  | DSE         | dermatan sulfate epimerase                                                                                           | 1,18 |
| 152065 | C3orf22     | chromosome 3 open reading frame 22                                                                                   | 1,18 |
| 7054   | TH          | tyrosine hydroxylase                                                                                                 | 1,17 |
| 10427  | ILMN_138457 | PREDICTED: Homo sapiens SEC24 related gene family, member B (S. cerevisiae), transcript variant 3 (SEC24B), mRNA.    | 1,17 |
| 5473   | PPBP        | pro-platelet basic protein (chemokine (C-X-C motif) ligand 7)                                                        | 1,17 |
| 5341   | PLEK        | pleckstrin                                                                                                           | 1,17 |
| 56890  | MDM1        | Mdm1 nuclear protein homolog (mouse)                                                                                 | 1,17 |
| 387820 | ILMN_26714  | PREDICTED: Homo sapiens similar to DnaJ (Hsp40) homolog, subfamily B, member 6 isoform a (LOC387820), mRNA.          | 1,17 |
| 2776   | GNAQ        | guanine nucleotide binding protein (G protein), q polypeptide                                                        | 1,17 |
| 54918  | CMTM6       | CKLF-like MARVEL transmembrane domain containing 6                                                                   | 1,17 |
| 7739   | ZNF185      | zinc finger protein 185 (LIM domain)                                                                                 | 1,16 |

|                        |                                                                                                                            |      |
|------------------------|----------------------------------------------------------------------------------------------------------------------------|------|
| 8764 TNFRSF14          | tumor necrosis factor receptor superfamily, member 14                                                                      | 1,16 |
| 8654 PDE5A             | phosphodiesterase 5A, cGMP-specific                                                                                        | 1,16 |
| 400948 ILMN_32897      | PREDICTED: Homo sapiens similar to CG33774-PA (LOC400948), mRNA.                                                           | 1,16 |
| 55683 KIAA1310         | KIAA1310                                                                                                                   | 1,16 |
| 239 ALOX12             | arachidonate 12-lipoxygenase                                                                                               | 1,16 |
| 283131 ILMN_138191     | PREDICTED: Homo sapiens trophoblast-derived noncoding RNA (TncRNA), misc RNA.                                              | 1,15 |
| 100131943 LOC100131943 | hypothetical LOC100131943                                                                                                  | 1,15 |
| 10357 HMGB1P1          | high mobility group box 1 pseudogene 1                                                                                     | 1,15 |
| 65056 GPBP1            | GC-rich promoter binding protein 1                                                                                         | 1,15 |
| 2280 FKBP1A            | FK506 binding protein 1A, 12kDa                                                                                            | 1,15 |
| 5782 PTPN12            | protein tyrosine phosphatase, non-receptor type 12                                                                         | 1,14 |
| 9200 PTPLA             | protein tyrosine phosphatase-like (proline instead of catalytic arginine), member A                                        | 1,14 |
| 29074 MRPL18           | mitochondrial ribosomal protein L18                                                                                        | 1,14 |
| 4149 MAX               | MYC associated factor X                                                                                                    | 1,14 |
| 402221 ILMN_35678      | PREDICTED: Homo sapiens similar to actin alpha 1 skeletal muscle protein (LOC402221), mRNA.                                | 1,14 |
| 3953 LEPR              | leptin receptor                                                                                                            | 1,14 |
| ILMN_86083             | 602274281F1 NIH_MGC_85 Homo sapiens cDNA clone IMAGE:4362141 5, mRNA sequence                                              | 1,14 |
| 81631 MAP1LC3B         | microtubule-associated protein 1 light chain 3 beta                                                                        | 1,13 |
| 727958 ILMN_35093      | PREDICTED: Homo sapiens hypothetical protein LOC727958 (LOC727958), mRNA.                                                  | 1,13 |
| 646135 ILMN_39828      | PREDICTED: Homo sapiens hypothetical protein LOC646135 (LOC646135), mRNA.                                                  | 1,13 |
| 442204 ILMN_34044      | PREDICTED: Homo sapiens similar to myosin regulatory light chain-like (LOC442204), mRNA.                                   | 1,13 |
| ILMN_92185             | 602849957F1 NIH_MGC_10 Homo sapiens cDNA clone IMAGE:4991510 5, mRNA sequence                                              | 1,13 |
| 9191 DEDD              | death effector domain containing                                                                                           | 1,13 |
| 527 ATP6V0C            | ATPase, H+ transporting, lysosomal 16kDa, V0 subunit c                                                                     | 1,13 |
| 427 ASAH1              | N-acylsphingosine amidohydrolase (acid ceramidase) 1                                                                       | 1,13 |
| 80177 MYCT1            | myc target 1                                                                                                               | 1,12 |
| ILMN_100075            | Homo sapiens cDNA FLJ37325 fis, clone BRAMY2018295                                                                         | 1,12 |
| 54435 ILMN_42290       | Homo sapiens HLA complex group 4 (HCG4), non-coding RNA.                                                                   | 1,12 |
| 399886 ILMN_1487       | Homo sapiens FLJ41423 protein (FLJ41423), mRNA.                                                                            | 1,12 |
| 51185 CRBN             | cereblon                                                                                                                   | 1,12 |
| 79752 ILMN_23674       | Homo sapiens zinc finger, AN1-type domain 1 (ZFAND1), mRNA.                                                                | 1,11 |
| 339005 ILMN_32270      | Homo sapiens WAS protein homolog associated with actin, golgi membranes and microtubules-like 1 (WHAMML1), non-coding RNA. | 1,11 |

|        |             |                                                                                                                                   |      |
|--------|-------------|-----------------------------------------------------------------------------------------------------------------------------------|------|
| 124590 | USH1G       | Usher syndrome 1G (autosomal recessive)                                                                                           | 1,11 |
| 53346  | TM6SF1      | transmembrane 6 superfamily member 1                                                                                              | 1,11 |
| 23061  | ILMN_9169   | Homo sapiens TBC1 domain family, member 9B (with GRAM domain) (TBC1D9B), transcript variant 2, mRNA.                              | 1,11 |
| 4201   | MEA1        | male-enhanced antigen 1                                                                                                           | 1,11 |
|        | ILMN_90317  | Homo sapiens cDNA FLJ32550 fis, clone SPLEN1000056                                                                                | 1,11 |
| 2495   | FTH1        | ferritin, heavy polypeptide 1                                                                                                     | 1,11 |
| 54967  | ILMN_138751 | PREDICTED: Homo sapiens chromosome X open reading frame 48 (CXorf48), mRNA.                                                       | 1,11 |
| 6352   | CCL5        | chemokine (C-C motif) ligand 5                                                                                                    | 1,11 |
| 55744  | C7orf44     | chromosome 7 open reading frame 44                                                                                                | 1,11 |
| 408    | ARRB1       | arrestin, beta 1                                                                                                                  | 1,11 |
| 10000  | AKT3        | v-akt murine thymoma viral oncogene homolog 3 (protein kinase B, gamma)                                                           | 1,11 |
| 157680 | VPS13B      | vacuolar protein sorting 13 homolog B (yeast)                                                                                     | 1,1  |
| 22925  | ILMN_22699  | Homo sapiens phospholipase A2 receptor 1, 180kDa (PLA2R1), transcript variant 2, mRNA.                                            | 1,1  |
| 651723 | ILMN_39567  | PREDICTED: Homo sapiens similar to schlafen family member 13 (LOC651723), mRNA.                                                   | 1,1  |
| 644642 | ILMN_43268  | PREDICTED: Homo sapiens hypothetical protein LOC644642 (LOC644642), mRNA.                                                         | 1,1  |
| 89857  | KLHL6       | kelch-like 6 (Drosophila)                                                                                                         | 1,1  |
| 2273   | FHL1        | four and a half LIM domains 1                                                                                                     | 1,1  |
| 286006 | C7orf53     | chromosome 7 open reading frame 53                                                                                                | 1,1  |
| 84886  | C1orf198    | chromosome 1 open reading frame 198                                                                                               | 1,1  |
| 1822   | ATN1        | atrophin 1                                                                                                                        | 1,1  |
| 8751   | ILMN_138255 | PREDICTED: Homo sapiens ADAM metalloproteinase domain 15 (metargidin) (ADAM15), mRNA.                                             | 1,1  |
| 79752  | ILMN_23674  | Homo sapiens zinc finger, AN1-type domain 1 (ZFAND1), mRNA.                                                                       | 1,09 |
| 7531   | YWHAE       | tyrosine 3-monooxygenase/tryptophan 5-monooxygenase activation protein, epsilon polypeptide                                       | 1,09 |
| 5870   | RAB6A       | RAB6A, member RAS oncogene family                                                                                                 | 1,09 |
| 9861   | PSMD6       | proteasome (prosome, macropain) 26S subunit, non-ATPase, 6                                                                        | 1,09 |
| 653650 | ILMN_46005  | PREDICTED: Homo sapiens similar to 3-phosphoinositide dependent protein kinase 1 (hPDK1), transcript variant 6 (LOC653650), mRNA. | 1,09 |
| 3802   | ILMN_30269  | Homo sapiens killer cell immunoglobulin-like receptor, two domains, long cytoplasmic tail, 1 (KIR2DL1), mRNA.                     | 1,09 |
| 10553  | ILMN_16008  | Homo sapiens HIV-1 Tat interactive protein 2, 30kDa (HTATIP2), mRNA.                                                              | 1,09 |
|        | ILMN_113901 | BX088674 Soares_testis_NHT Homo sapiens cDNA clone IMAGp998A143518, mRNA sequence                                                 | 1,09 |
|        | ILMN_106290 | xc76e10.x1 NCI_CGAP_Ov32 Homo sapiens cDNA clone IMAGE:2590218 3, mRNA sequence                                                   | 1,09 |
|        | ILMN_103797 | Homo sapiens cDNA clone IMAGE:5260685                                                                                             | 1,09 |
| 760    | CA2         | carbonic anhydrase II                                                                                                             | 1,09 |



|                   |                                                                                                    |      |
|-------------------|----------------------------------------------------------------------------------------------------|------|
| 57038 RARS2       | arginyl-tRNA synthetase 2, mitochondrial                                                           | 1,08 |
| 651643 ILMN_39968 | PREDICTED: Homo sapiens hypothetical protein LOC651643 (LOC651643), mRNA.                          | 1,08 |
| 387882 ILMN_23241 | Homo sapiens hypothetical protein (LOC387882), mRNA.                                               | 1,08 |
| ILMN_87232        | UI-E-EJ0-ahk-m-09-0-UI.r2 UI-E-EJ0 Homo sapiens cDNA clone UI-E-EJ0-ahk-m-09-0-UI 5, mRNA sequence | 1,08 |
| 1647 GADD45A      | growth arrest and DNA-damage-inducible, alpha                                                      | 1,08 |
| 391059 FRRS1      | ferric-chelate reductase 1                                                                         | 1,08 |
| 51582 AZIN1       | antizyme inhibitor 1                                                                               | 1,08 |
| 27072 VPS41       | vacuolar protein sorting 41 homolog (S. cerevisiae)                                                | 1,07 |
| 9342 SNAP29       | synaptosomal-associated protein, 29kDa                                                             | 1,07 |
| 9963 SLC23A1      | solute carrier family 23 (nucleobase transporters), member 1                                       | 1,07 |
| 8031 NCOA4        | nuclear receptor coactivator 4                                                                     | 1,07 |
| 730077 ILMN_39361 | PREDICTED: Homo sapiens similar to NEW1 domain containing protein isoform 1 (LOC730077), mRNA.     | 1,07 |
| 56940 ILMN_138115 | PREDICTED: Homo sapiens dual specificity phosphatase 22 (DUSP22), mRNA.                            | 1,07 |
| 10257 ABCC4       | ATP-binding cassette, sub-family C (CFTR/MRP), member 4                                            | 1,07 |
| 339005 WHAMMP3    | WAS protein homolog associated with actin, golgi membranes and microtubules pseudogene 3           | 1,06 |
| 25816 TNFAIP8     | tumor necrosis factor, alpha-induced protein 8                                                     | 1,06 |
| 23512 SUZ12       | suppressor of zeste 12 homolog (Drosophila)                                                        | 1,06 |
| 115286 ILMN_15118 | Homo sapiens solute carrier family 25, member 26 (SLC25A26), transcript variant 3, mRNA.           | 1,06 |
| 5573 PRKAR1A      | protein kinase, cAMP-dependent, regulatory, type I, alpha (tissue specific extinguisher 1)         | 1,06 |
| 29780 PARVB       | parvin, beta                                                                                       | 1,06 |
| 8736 MYOM1        | myomesin 1, 185kDa                                                                                 | 1,06 |
| 4585 ILMN_138880  | PREDICTED: Homo sapiens mucin 4, tracheobronchial (MUC4), mRNA.                                    | 1,06 |
| 136319 MTPN       | myotrophin                                                                                         | 1,06 |
| 729003 ILMN_40608 | PREDICTED: Homo sapiens hypothetical protein LOC729003 (LOC729003), mRNA.                          | 1,06 |
| 2537 IFI6         | interferon, alpha-inducible protein 6                                                              | 1,06 |
| ILMN_128394       | DB341695 TESTI4 Homo sapiens cDNA clone TESTI4045781 3, mRNA sequence                              | 1,06 |
| ILMN_122627       | ai16e07.s1 Soares_parathyroid_tumor_NbHPA Homo sapiens cDNA clone 1342980 3, mRNA sequence         | 1,06 |
| ILMN_85871        | nu88b06.s1 NCI_CGAP_Alv1 Homo sapiens cDNA clone IMAGE:1217747, mRNA sequence                      | 1,06 |
| 3005 H1FO         | H1 histone family, member 0                                                                        | 1,06 |
| 1603 DAD1         | defender against cell death 1                                                                      | 1,06 |
| 51433 ANAPC5      | anaphase promoting complex subunit 5                                                               | 1,06 |
| 6845 VAMP7        | vesicle-associated membrane protein 7                                                              | 1,05 |
| 6001 RGS10        | regulator of G-protein signaling 10                                                                | 1,05 |

|           |               |                                                                                                                      |      |
|-----------|---------------|----------------------------------------------------------------------------------------------------------------------|------|
| 347168    | OR1J1         | olfactory receptor, family 1, subfamily J, member 1                                                                  | 1,05 |
| 647000    | ILMN_45576    | PREDICTED: Homo sapiens similar to tubulin, beta 5 (LOC647000), mRNA.                                                | 1,05 |
|           | ILMN_130543   | DB038017 TESTI2 Homo sapiens cDNA clone TESTI2024179 5, mRNA sequence                                                | 1,05 |
| 2287      | FKBP3         | FK506 binding protein 3, 25kDa                                                                                       | 1,05 |
| 9637      | FEZ2          | fasciculation and elongation protein zeta 2 (zygin II)                                                               | 1,05 |
| 4735      | 2.IX septin 2 |                                                                                                                      | 1,04 |
| 6016      | RIT1          | Ras-like without CAAX 1                                                                                              | 1,04 |
| 84281     | C2orf88       | chromosome 2 open reading frame 88                                                                                   | 1,04 |
|           | ILMN_73823    | Homo sapiens cDNA: FLJ23006 fis, clone LNG00414                                                                      | 1,04 |
|           | ILMN_117904   | UI-H-BW1-anw-a-06-0-UI.s1 NCI_CGAP_Sub7 Homo sapiens cDNA clone IMAGE:3083435 3, mRNA sequence                       | 1,04 |
| 649181    | ILMN_41226    | PREDICTED: Homo sapiens hypothetical protein LOC649181 (LOC649181), mRNA.                                            | 1,03 |
|           | ILMN_81181    | Homo sapiens cDNA FLJ36653 fis, clone UTERU2001176                                                                   | 1,03 |
| 2852      | GPER          | G protein-coupled estrogen receptor 1                                                                                | 1,03 |
| 1948      | EFNB2         | ephrin-B2                                                                                                            | 1,03 |
| 10059     | DNM1L         | dynamitin 1-like                                                                                                     | 1,03 |
| 27071     | DAPP1         | dual adaptor of phosphotyrosine and 3-phosphoinositides                                                              | 1,03 |
| 55256     | ADI1          | acireductone dioxygenase 1                                                                                           | 1,03 |
| 23032     | USP33         | ubiquitin specific peptidase 33                                                                                      | 1,02 |
| 6451      | SH3BGR1       | SH3 domain binding glutamic acid-rich protein like                                                                   | 1,02 |
| 11031     | RAB31         | RAB31, member RAS oncogene family                                                                                    | 1,02 |
| 10611     | PDLIM5        | PDZ and LIM domain 5                                                                                                 | 1,02 |
| 122773    | KLHDC1        | kelch domain containing 1                                                                                            | 1,02 |
| 3811      | KIR3DL1       | killer cell immunoglobulin-like receptor, three domains, long cytoplasmic tail, 1                                    | 1,02 |
| 10082     | GPC6          | glypican 6                                                                                                           | 1,02 |
| 1859      | ILMN_19737    | Homo sapiens dual-specificity tyrosine-(Y)-phosphorylation regulated kinase 1A (DYRK1A), transcript variant 3, mRNA. | 1,02 |
| 7402      | UTRN          | utrophin                                                                                                             | 1,01 |
| 400952    | ILMN_36207    | PREDICTED: Homo sapiens NGNL6975 (UNQ6975), mRNA.                                                                    | 1,01 |
| 653463    | ILMN_31314    | PREDICTED: Homo sapiens similar to hypothetical gene supported by AK127120 (LOC653463), mRNA.                        | 1,01 |
| 100288367 | LOC100288367  | golgin A2 pseudogene                                                                                                 | 1,01 |
| 57461     | ISY1          | ISY1 splicing factor homolog (S. cerevisiae)                                                                         | 1,01 |
|           | ILMN_106734   | xc23f04.x1 NCI_CGAP_Co19 Homo sapiens cDNA clone IMAGE:2585119 3, mRNA sequence                                      | 1,01 |
|           | ILMN_76886    | Homo sapiens cDNA FLJ42306 fis, clone TRACH2001646                                                                   | 1,01 |

|                   |                                                                                                                                     |       |
|-------------------|-------------------------------------------------------------------------------------------------------------------------------------|-------|
| 3190 HNRNPK       | heterogeneous nuclear ribonucleoprotein K                                                                                           | 1,01  |
| 28996 HIPK2       | homeodomain interacting protein kinase 2                                                                                            | 1,01  |
| 55207 ARL8B       | ADP-ribosylation factor-like 8B                                                                                                     | 1,01  |
| 57552 NCEH1       | neutral cholesterol ester hydrolase 1                                                                                               | 1,01  |
| 6399 ILMN_558     | Homo sapiens trafficking protein particle complex 2 (TRAPPC2), transcript variant 2, mRNA.                                          | 1     |
| 64849 ILMN_13280  | Homo sapiens solute carrier family 13 (sodium-dependent dicarboxylate transporter), member 3 (SLC13A3), transcript variant 1, mRNA. | 1     |
| 84236 RHBDD1      | rhomboid domain containing 1                                                                                                        | 1     |
| 653136 ILMN_39035 | PREDICTED: Homo sapiens similar to IFP38 (LOC653136), mRNA.                                                                         | 1     |
| 649897 ILMN_45446 | PREDICTED: Homo sapiens similar to Ig gamma-2 chain C region (LOC649897), mRNA.                                                     | 1     |
| ILMN_119248       | UI-E-CK1-agb-m-11-0-UI.s1 UI-E-CK1 Homo sapiens cDNA clone UI-E-CK1-agb-m-11-0-UI 3, mRNA sequence                                  | 1     |
| 85865 ILMN_166088 | Homo sapiens GTP-binding protein 10 (putative) (GTPBP10), transcript variant 1, mRNA.                                               | 1     |
| 2733 GLE1         | GLE1 RNA export mediator homolog (yeast)                                                                                            | 1     |
| 375061 FAM89A     | family with sequence similarity 89, member A                                                                                        | 1     |
| 26298 EHF         | ets homologous factor                                                                                                               | 1     |
| 402 ARL2          | ADP-ribosylation factor-like 2                                                                                                      | 1     |
| 6181 RPLP2        | ribosomal protein, large, P2                                                                                                        | -1    |
| 6135 RPL11        | ribosomal protein L11                                                                                                               | -1    |
| 55629 ILMN_7879   | Homo sapiens proline-rich nuclear receptor coactivator 2 (PNRC2), mRNA.                                                             | -1    |
| 10135 NAMPT       | nicotinamide phosphoribosyltransferase                                                                                              | -1    |
| 400464 ILMN_15604 | Homo sapiens similar to FLJ43276 protein (LOC400464), mRNA.                                                                         | -1    |
| 10818 FRS2        | fibroblast growth factor receptor substrate 2                                                                                       | -1    |
| 1236 CCR7         | chemokine (C-C motif) receptor 7                                                                                                    | -1    |
| 79630 C1orf54     | chromosome 1 open reading frame 54                                                                                                  | -1    |
| 64422 ATG3        | ATG3 autophagy related 3 homolog (S. cerevisiae)                                                                                    | -1    |
| 51385 ZNF589      | zinc finger protein 589                                                                                                             | -1,01 |
| 7874 USP7         | ubiquitin specific peptidase 7 (herpes virus-associated)                                                                            | -1,01 |
| 7045 TGFBI        | transforming growth factor, beta-induced, 68kDa                                                                                     | -1,01 |
| 57466 SCAF4       | SR-related CTD-associated factor 4                                                                                                  | -1,01 |
| 6281 S100A10      | S100 calcium binding protein A10                                                                                                    | -1,01 |
| 29108 PYCARD      | PYD and CARD domain containing                                                                                                      | -1,01 |
| 51317 PHF21A      | PHD finger protein 21A                                                                                                              | -1,01 |
| 51199 NIN         | ninein (GSK3B interacting protein)                                                                                                  | -1,01 |

|                   |                                                                                                                                                                     |       |
|-------------------|---------------------------------------------------------------------------------------------------------------------------------------------------------------------|-------|
| 728734 ILMN_12371 | PREDICTED: Homo sapiens similar to kidney-specific protein (KS), transcript variant 1 (LOC728734), mRNA.                                                            | -1,01 |
| 653226 SRP9P1     | signal recognition particle 9 pseudogene 1                                                                                                                          | -1,01 |
| 643920 ILMN_39946 | PREDICTED: Homo sapiens region containing similar to Williams Beuren syndrome chromosome region 19; hypothetical LOC441257, transcript variant 2 (LOC643920), mRNA. | -1,01 |
| ILMN_107450       | UI-CF-DU1-aag-j-05-0-UI.s1 UI-CF-DU1 Homo sapiens cDNA clone UI-CF-DU1-aag-j-05-0-UI 3, mRNA sequence                                                               | -1,01 |
| 2841 GPR18        | G protein-coupled receptor 18                                                                                                                                       | -1,01 |
| 285527 FRYL       | FRY-like                                                                                                                                                            | -1,01 |
| 115761 ARL11      | ADP-ribosylation factor-like 11                                                                                                                                     | -1,01 |
| 7259 TSPYL1       | TSPY-like 1                                                                                                                                                         | -1,02 |
| 6921 TCEB1        | transcription elongation factor B (SIII), polypeptide 1 (15kDa, elongin C)                                                                                          | -1,02 |
| 6277 S100A6       | S100 calcium binding protein A6                                                                                                                                     | -1,02 |
| 4144 MAT2A        | methionine adenosyltransferase II, alpha                                                                                                                            | -1,02 |
| 8939 FUBP3        | far upstream element (FUSE) binding protein 3                                                                                                                       | -1,02 |
| 22837 COBLL1      | COBL-like 1                                                                                                                                                         | -1,02 |
| 56683 C21orf59    | chromosome 21 open reading frame 59                                                                                                                                 | -1,02 |
| 79090 TRAPPC6A    | trafficking protein particle complex 6A                                                                                                                             | -1,03 |
| 54968 TMEM70      | transmembrane protein 70                                                                                                                                            | -1,03 |
| 9491 PSMF1        | proteasome (prosome, macropain) inhibitor subunit 1 (PI31)                                                                                                          | -1,03 |
| 10621 ILMN_5317   | Homo sapiens polymerase (RNA) III (DNA directed) polypeptide F, 39 kDa (POLR3F), mRNA.                                                                              | -1,03 |
| 653506 ILMN_30995 | PREDICTED: Homo sapiens similar to meteorin, glial cell differentiation regulator-like (LOC653506), mRNA.                                                           | -1,03 |
| 2999 GZMH         | granzyme H (cathepsin G-like 2, protein h-CCPX)                                                                                                                     | -1,03 |
| 9535 GMFG         | glia maturation factor, gamma                                                                                                                                       | -1,03 |
| 79571 GCC1        | GRIP and coiled-coil domain containing 1                                                                                                                            | -1,03 |
| 1736 DKC1         | dyskeratosis congenita 1, dyskerin                                                                                                                                  | -1,03 |
| 79012 CAMKV       | CaM kinase-like vesicle-associated                                                                                                                                  | -1,03 |
| 388078 ILMN_31332 | PREDICTED: Homo sapiens V-set and immunoglobulin domain containing 6 (VSIG6), mRNA.                                                                                 | -1,04 |
| 706 TSPO          | translocator protein (18kDa)                                                                                                                                        | -1,04 |
| 6902 TBCA         | tubulin folding cofactor A                                                                                                                                          | -1,04 |
| 26801 SNORD48     | small nucleolar RNA, C/D box 48                                                                                                                                     | -1,04 |
| 29964 PRICKLE4    | prickle homolog 4 (Drosophila)                                                                                                                                      | -1,04 |
| 126382 NR2C2AP    | nuclear receptor 2C2-associated protein                                                                                                                             | -1,04 |
| 3482 IGF2R        | insulin-like growth factor 2 receptor                                                                                                                               | -1,04 |
| 112398 EGLN2      | egl nine homolog 2 (C. elegans)                                                                                                                                     | -1,04 |

|                   |                                                                                                                                    |       |
|-------------------|------------------------------------------------------------------------------------------------------------------------------------|-------|
| 10294 DNAJA2      | DnaJ (Hsp40) homolog, subfamily A, member 2                                                                                        | -1,04 |
| 28969 BZW2        | basic leucine zipper and W2 domains 2                                                                                              | -1,04 |
| 54499 TMCO1       | transmembrane and coiled-coil domains 1                                                                                            | -1,05 |
| 6726 SRP9         | signal recognition particle 9kDa                                                                                                   | -1,05 |
| 51728 POLR3K      | polymerase (RNA) III (DNA directed) polypeptide K, 12.3 kDa                                                                        | -1,05 |
| 6147 RPL23A       | ribosomal protein L23a                                                                                                             | -1,05 |
| ILMN_104476       | zj45e10.s1 Soares_fetal_liver_spleen_1NFLS_S1 Homo sapiens cDNA clone IMAGE:453258 3, mRNA sequence                                | -1,05 |
| 2353 FOS          | FBJ murine osteosarcoma viral oncogene homolog                                                                                     | -1,05 |
| 539 ATP5O         | ATP synthase, H <sup>+</sup> transporting, mitochondrial F1 complex, O subunit                                                     | -1,05 |
| 7133 TNFRSF1B     | tumor necrosis factor receptor superfamily, member 1B                                                                              | -1,06 |
| 92241 RCSD1       | RCSD domain containing 1                                                                                                           | -1,06 |
| 54625 PARP14      | poly (ADP-ribose) polymerase family, member 14                                                                                     | -1,06 |
| 11165 NUDT3       | nudix (nucleoside diphosphate linked moiety X)-type motif 3                                                                        | -1,06 |
| 64231 ILMN_2009   | Homo sapiens membrane-spanning 4-domains, subfamily A, member 6A (MS4A6A), transcript variant 2, mRNA.                             | -1,06 |
| 134997 ILMN_1017  | Homo sapiens peptidylprolyl isomerase A processed pseudogene (LOC134997) on chromosome 6.                                          | -1,06 |
| 728358 ILMN_11220 | Homo sapiens defensin, alpha 1B (DEFA1B), mRNA.                                                                                    | -1,06 |
| 64225 ATL2        | atlastin GTPase 2                                                                                                                  | -1,06 |
| 23370 ARHGEF18    | Rho/Rac guanine nucleotide exchange factor (GEF) 18                                                                                | -1,06 |
| 200316 ILMN_1659  | Homo sapiens apolipoprotein B mRNA editing enzyme, catalytic polypeptide-like 3F (APOBEC3F), transcript variant 1, mRNA.           | -1,06 |
| 6817 ILMN_28965   | Homo sapiens sulfotransferase family, cytosolic, 1A, phenol-preferring, member 1 (SULT1A1), transcript variant 5, mRNA.            | -1,07 |
| 3716 JAK1         | Janus kinase 1                                                                                                                     | -1,07 |
| 220988 HNRNPA3    | heterogeneous nuclear ribonucleoprotein A3                                                                                         | -1,07 |
| 9637 FEZ2         | fasciculation and elongation protein zeta 2 (zygin II)                                                                             | -1,07 |
| 1327 COX4I1       | cytochrome c oxidase subunit IV isoform 1                                                                                          | -1,07 |
| 56994 CHPT1       | choline phosphotransferase 1                                                                                                       | -1,07 |
| 805 CALM2         | calmodulin 2 (phosphorylase kinase, delta)                                                                                         | -1,07 |
| 55813 UTP6        | UTP6, small subunit (SSU) processome component, homolog (yeast)                                                                    | -1,08 |
| 7329 UBE2I        | ubiquitin-conjugating enzyme E2I                                                                                                   | -1,08 |
| 7267 TTC3         | tetratricopeptide repeat domain 3                                                                                                  | -1,08 |
| 8148 ILMN_18165   | Homo sapiens TAF15 RNA polymerase II, TATA box binding protein (TBP)-associated factor, 68kDa (TAF15), transcript variant 2, mRNA. | -1,08 |

|                   |                                                                                                                      |       |
|-------------------|----------------------------------------------------------------------------------------------------------------------|-------|
| 30968 STOML2      | stomatin (EPB72)-like 2                                                                                              | -1,08 |
| 55505 NOP10       | NOP10 ribonucleoprotein homolog (yeast)                                                                              | -1,08 |
| 4191 MDH2         | malate dehydrogenase 2, NAD (mitochondrial)                                                                          | -1,08 |
| 3181 HNRNPA2B1    | heterogeneous nuclear ribonucleoprotein A2/B1                                                                        | -1,08 |
| 3043 HBB          | hemoglobin, beta                                                                                                     | -1,08 |
| 2665 GDI2         | GDP dissociation inhibitor 2                                                                                         | -1,08 |
| 55140 ELP3        | elongation protein 3 homolog (S. cerevisiae)                                                                         | -1,08 |
| 51596 CUTA        | cutA divalent cation tolerance homolog (E. coli)                                                                     | -1,08 |
| 55101 ILMN_12644  | Homo sapiens ATP5S-like (ATP5SL), mRNA.                                                                              | -1,08 |
| 7178 TPT1         | tumor protein, translationally-controlled 1                                                                          | -1,09 |
| 6612 SUMO3        | SMT3 suppressor of mif two 3 homolog 3 (S. cerevisiae)                                                               | -1,09 |
| 51065 RPS27L      | ribosomal protein S27-like                                                                                           | -1,09 |
| 5500 PPP1CB       | protein phosphatase 1, catalytic subunit, beta isozyme                                                               | -1,09 |
| 5216 PFN1         | profilin 1                                                                                                           | -1,09 |
| 64324 NSD1        | nuclear receptor binding SET domain protein 1                                                                        | -1,09 |
| 400818 ILMN_26956 | Homo sapiens neuroblastoma breakpoint family, member 20 (NBPF20), mRNA.                                              | -1,09 |
| 64951 MRPS24      | mitochondrial ribosomal protein S24                                                                                  | -1,09 |
| 285053 ILMN_44464 | PREDICTED: Homo sapiens similar to ribosomal protein L18a, transcript variant 1 (LOC285053), mRNA.                   | -1,09 |
| 56943 ENY2        | enhancer of yellow 2 homolog (Drosophila)                                                                            | -1,09 |
| 55661 DDX27       | DEAD (Asp-Glu-Ala-Asp) box polypeptide 27                                                                            | -1,09 |
| 10658 ILMN_10496  | Homo sapiens CUG triplet repeat, RNA binding protein 1 (CUGBP1), transcript variant 2, mRNA.                         | -1,09 |
| 1396 CRIP1        | cysteine-rich protein 1 (intestinal)                                                                                 | -1,09 |
| 929 CD14          | CD14 molecule                                                                                                        | -1,09 |
| 22809 ATF5        | activating transcription factor 5                                                                                    | -1,09 |
| 8795 TNFRSF10B    | tumor necrosis factor receptor superfamily, member 10b                                                               | -1,1  |
| 292 SLC25A5       | solute carrier family 25 (mitochondrial carrier; adenine nucleotide translocator), member 5                          | -1,1  |
| 6390 SDHB         | succinate dehydrogenase complex, subunit B, iron sulfur (lp)                                                         | -1,1  |
| 441502 RPS26P11   | ribosomal protein S26 pseudogene 11                                                                                  | -1,1  |
| 5705 PSMC5        | proteasome (prosome, macropain) 26S subunit, ATPase, 5                                                               | -1,1  |
| 5538 PPT1         | palmitoyl-protein thioesterase 1                                                                                     | -1,1  |
| 6187 RPS2         | ribosomal protein S2                                                                                                 | -1,1  |
| 440341 ILMN_34066 | PREDICTED: Homo sapiens similar to nuclear pore complex interacting protein, transcript variant 4 (LOC440341), mRNA. | -1,1  |

|                 |                                                                                |       |
|-----------------|--------------------------------------------------------------------------------|-------|
| 3178 HNRNPA1    | heterogeneous nuclear ribonucleoprotein A1                                     | -1,1  |
| 3065 HDAC1      | histone deacetylase 1                                                          | -1,1  |
| 2948 ILMN_4003  | Homo sapiens glutathione S-transferase M4 (GSTM4), transcript variant 2, mRNA. | -1,1  |
| 1520 ILMN_13149 | Homo sapiens cathepsin S (CTSS), mRNA.                                         | -1,1  |
| 150684 COMMD1   | copper metabolism (Murr1) domain containing 1                                  | -1,1  |
| 23468 CBX5      | chromobox homolog 5                                                            | -1,1  |
| 389541 C7orf59  | chromosome 7 open reading frame 59                                             | -1,1  |
| 689 BTF3        | basic transcription factor 3                                                   | -1,1  |
| 9938 ARHGAP25   | Rho GTPase activating protein 25                                               | -1,1  |
| 7247 TSN        | translin                                                                       | -1,11 |
| 7127 ILMN_16372 | Homo sapiens tumor necrosis factor, alpha-induced protein 2 (TNFAIP2), mRNA.   | -1,11 |
| 10287 RGS19     | regulator of G-protein signaling 19                                            | -1,11 |
| 5660 PSAP       | prosaposin                                                                     | -1,11 |
| 118788 PIK3AP1  | phosphoinositide-3-kinase adaptor protein 1                                    | -1,11 |
| 9284 ILMN_10143 | Homo sapiens nuclear pore complex interacting protein (NPIP), mRNA.            | -1,11 |
| ILMN_132410     | AV735490 CB Homo sapiens cDNA clone CBFBD05 5, mRNA sequence                   | -1,11 |
| 54541 DDIT4     | DNA-damage-inducible transcript 4                                              | -1,11 |
| 1642 DDB1       | damage-specific DNA binding protein 1, 127kDa                                  | -1,11 |
| 1540 ILMN_28818 | Homo sapiens cylindromatosis (turban tumor syndrome) (CYLD), mRNA.             | -1,11 |
| 919 CD247       | CD247 molecule                                                                 | -1,11 |
| 908 CCT6A       | chaperonin containing TCP1, subunit 6A (zeta 1)                                | -1,11 |
| 865 CBFB        | core-binding factor, beta subunit                                              | -1,11 |
| 9584 RBM39      | RNA binding motif protein 39                                                   | -1,12 |
| 5788 PTPRC      | protein tyrosine phosphatase, receptor type, C                                 | -1,12 |
| 2782 GNB1       | guanine nucleotide binding protein (G protein), beta polypeptide 1             | -1,12 |
| 9158 FIBP       | fibroblast growth factor (acidic) intracellular binding protein                | -1,12 |
| 1667 ILMN_29692 | Homo sapiens defensin, alpha 1 (DEFA1), mRNA.                                  | -1,12 |
| 56993 TOMM22    | translocase of outer mitochondrial membrane 22 homolog (yeast)                 | -1,13 |
| 4666 NACA       | nascent polypeptide-associated complex alpha subunit                           | -1,13 |
| 7462 LAT2       | linker for activation of T cells family, member 2                              | -1,13 |
| 3059 HCLS1      | hematopoietic cell-specific Lyn substrate 1                                    | -1,13 |
| 1340 COX6B1     | cytochrome c oxidase subunit VIb polypeptide 1 (ubiquitous)                    | -1,13 |
| 1043 CD52       | CD52 molecule                                                                  | -1,13 |

|                   |                                                                                                                                                                                       |       |
|-------------------|---------------------------------------------------------------------------------------------------------------------------------------------------------------------------------------|-------|
| 148789 B3GALNT2   | beta-1,3-N-acetylgalactosaminyltransferase 2                                                                                                                                          | -1,13 |
| 199 AIF1          | allograft inflammatory factor 1                                                                                                                                                       | -1,13 |
| 5250 SLC25A3      | solute carrier family 25 (mitochondrial carrier; phosphate carrier), member 3                                                                                                         | -1,14 |
| 11040 ILMN_27932  | Homo sapiens pim-2 oncogene (PIM2), mRNA.                                                                                                                                             | -1,14 |
| 4722 NDUFS3       | NADH dehydrogenase (ubiquinone) Fe-S protein 3, 30kDa (NADH-coenzyme Q reductase)                                                                                                     | -1,14 |
| 650029 ILMN_38295 | PREDICTED: Homo sapiens similar to RNA-binding protein 4 (RNA-binding motif protein 4) (Lark homolog) (Hlark) (RNA-binding motif protein 4a), transcript variant 1 (LOC650029), mRNA. | -1,14 |
| 644131 CCT8P1     | chaperonin containing TCP1, subunit 8 (theta) pseudogene 1                                                                                                                            | -1,14 |
| 641996 ILMN_32260 | PREDICTED: Homo sapiens hypothetical protein LOC641996 (LOC641996), mRNA.                                                                                                             | -1,14 |
| 284194 LGALS9B    | lectin, galactoside-binding, soluble, 9B                                                                                                                                              | -1,14 |
| 3683 ILMN_15930   | Homo sapiens integrin, alpha L (antigen CD11A (p180), lymphocyte function-associated antigen 1; alpha polypeptide) (ITGAL), mRNA.                                                     | -1,14 |
| 1668 ILMN_11220   | Homo sapiens defensin, alpha 3, neutrophil-specific (DEFA3), mRNA.                                                                                                                    | -1,14 |
| 11325 DDX42       | DEAD (Asp-Glu-Ala-Asp) box polypeptide 42                                                                                                                                             | -1,14 |
| 6138 RPL15        | ribosomal protein L15                                                                                                                                                                 | -1,15 |
| 149628 PYHIN1     | pyrin and HIN domain family, member 1                                                                                                                                                 | -1,15 |
| 648840 ILMN_37663 | PREDICTED: Homo sapiens hypothetical protein LOC648840 (LOC648840), mRNA.                                                                                                             | -1,15 |
| 6141 RPL18        | ribosomal protein L18                                                                                                                                                                 | -1,15 |
| ILMN_83371        | full-length cDNA clone CS0DC013YI10 of Neuroblastoma Cot 25-normalized of Homo sapiens (human)                                                                                        | -1,15 |
| 9170 LPAR2        | lysophosphatidic acid receptor 2                                                                                                                                                      | -1,15 |
| 55619 DOCK10      | dedicator of cytokinesis 10                                                                                                                                                           | -1,15 |
| 159 ADSS          | adenylosuccinate synthase                                                                                                                                                             | -1,15 |
| 51522 TMEM14C     | transmembrane protein 14C                                                                                                                                                             | -1,16 |
| 25949 SYF2        | SYF2 homolog, RNA splicing factor ( <i>S. cerevisiae</i> )                                                                                                                            | -1,16 |
| 6122 ILMN_29090   | Homo sapiens ribosomal protein L3 (RPL3), transcript variant 2, mRNA.                                                                                                                 | -1,16 |
| 64326 RFWD2       | ring finger and WD repeat domain 2                                                                                                                                                    | -1,16 |
| 83937 RASSF4      | Ras association (RalGDS/AF-6) domain family member 4                                                                                                                                  | -1,16 |
| 3543 IGLL1        | immunoglobulin lambda-like polypeptide 1                                                                                                                                              | -1,16 |
| 10542 HBXIP       | hepatitis B virus x interacting protein                                                                                                                                               | -1,16 |
| 1653 DDX1         | DEAD (Asp-Glu-Ala-Asp) box polypeptide 1                                                                                                                                              | -1,16 |
| 689 BTF3          | basic transcription factor 3                                                                                                                                                          | -1,16 |
| 8125 ANP32A       | acidic (leucine-rich) nuclear phosphoprotein 32 family, member A                                                                                                                      | -1,16 |
| 10285 SMNDC1      | survival motor neuron domain containing 1                                                                                                                                             | -1,17 |



|                   |                                                                                                                                                                                       |       |
|-------------------|---------------------------------------------------------------------------------------------------------------------------------------------------------------------------------------|-------|
| 6176 RPLP1        | ribosomal protein, large, P1                                                                                                                                                          | -1,17 |
| 6885 MAP3K7       | mitogen-activated protein kinase kinase kinase 7                                                                                                                                      | -1,17 |
| 644037 HNRNPA1P12 | heterogeneous nuclear ribonucleoprotein A1 pseudogene 12                                                                                                                              | -1,17 |
| 9807 IP6K1        | inositol hexakisphosphate kinase 1                                                                                                                                                    | -1,17 |
| ILMN_108776       | od80c09.s1 NCI_CGAP_Ov2 Homo sapiens cDNA clone IMAGE:1374256, mRNA sequence                                                                                                          | -1,17 |
| 2217 FCGRT        | Fc fragment of IgG, receptor, transporter, alpha                                                                                                                                      | -1,17 |
| 441168 FAM26F     | family with sequence similarity 26, member F                                                                                                                                          | -1,17 |
| 57609 DIP2B       | DIP2 disco-interacting protein 2 homolog B (Drosophila)                                                                                                                               | -1,17 |
| 301 ANXA1         | annexin A1                                                                                                                                                                            | -1,17 |
| 55754 TMEM30A     | transmembrane protein 30A                                                                                                                                                             | -1,18 |
| 255758 TCTEX1D2   | Tctex1 domain containing 2                                                                                                                                                            | -1,18 |
| 8893 EIF2B5       | eukaryotic translation initiation factor 2B, subunit 5 epsilon, 82kDa                                                                                                                 | -1,18 |
| 1075 CTSC         | cathepsin C                                                                                                                                                                           | -1,18 |
| 868 CBLB          | Cas-Br-M (murine) ecotropic retroviral transforming sequence b                                                                                                                        | -1,18 |
| 10476 ATP5H       | ATP synthase, H <sup>+</sup> transporting, mitochondrial Fo complex, subunit d                                                                                                        | -1,18 |
| 515 ATP5F1        | ATP synthase, H <sup>+</sup> transporting, mitochondrial Fo complex, subunit B1                                                                                                       | -1,18 |
| 7431 VIM          | vimentin                                                                                                                                                                              | -1,19 |
| 57050 UTP3        | UTP3, small subunit (SSU) processome component, homolog (S. cerevisiae)                                                                                                               | -1,19 |
| 8675 STX16        | syntaxin 16                                                                                                                                                                           | -1,19 |
| 645317 ILMN_15841 | PREDICTED: Homo sapiens similar to Coiled-coil-helix-coiled-coil-helix domain-containing protein 2 (HCV NS2 trans-regulated protein) (NS2TP), transcript variant 3 (LOC645317), mRNA. | -1,19 |
| 27246 RNF115      | ring finger protein 115                                                                                                                                                               | -1,2  |
| 51506 UFC1        | ubiquitin-fold modifier conjugating enzyme 1                                                                                                                                          | -1,2  |
| 6154 RPL26        | ribosomal protein L26                                                                                                                                                                 | -1,2  |
| 5293 PIK3CD       | phosphoinositide-3-kinase, catalytic, delta polypeptide                                                                                                                               | -1,2  |
| 55303 GIMAP4      | GTPase, IMAP family member 4                                                                                                                                                          | -1,2  |
| 51142 CHCHD2      | coiled-coil-helix-coiled-coil-helix domain containing 2                                                                                                                               | -1,2  |
| 55196 C12orf35    | chromosome 12 open reading frame 35                                                                                                                                                   | -1,2  |
| 9790 BMS1         | BMS1 homolog, ribosome assembly protein (yeast)                                                                                                                                       | -1,2  |
| 303 ANXA2P1       | annexin A2 pseudogene 1                                                                                                                                                               | -1,2  |
| 7324 UBE2E1       | ubiquitin-conjugating enzyme E2E 1                                                                                                                                                    | -1,21 |
| 9806 SPOCK2       | sparc/osteonectin, cwcv and kazal-like domains proteoglycan (testican) 2                                                                                                              | -1,21 |
| 5876 RABGGTB      | Rab geranylgeranyltransferase, beta subunit                                                                                                                                           | -1,21 |

|                   |                                                                                                       |       |
|-------------------|-------------------------------------------------------------------------------------------------------|-------|
| 9782 MATR3        | matrin 3                                                                                              | -1,21 |
| 3326 HSP90AB1     | heat shock protein 90kDa alpha (cytosolic), class B member 1                                          | -1,21 |
| 10236 HNRNPR      | heterogeneous nuclear ribonucleoprotein R                                                             | -1,21 |
| 3187 HNRNPH1      | heterogeneous nuclear ribonucleoprotein H1 (H)                                                        | -1,21 |
| 115362 GBP5       | guanylate binding protein 5                                                                           | -1,21 |
| 8087 FXR1         | fragile X mental retardation, autosomal homolog 1                                                     | -1,21 |
| 116496 FAM129A    | family with sequence similarity 129, member A                                                         | -1,21 |
| 10436 EMG1        | EMG1 nucleolar protein homolog (S. cerevisiae)                                                        | -1,21 |
| 51726 DNAJB11     | DnaJ (Hsp40) homolog, subfamily B, member 11                                                          | -1,21 |
| 221443 C6orf130   | chromosome 6 open reading frame 130                                                                   | -1,21 |
| 25939 ILMN_17752  | Homo sapiens SAM domain and HD domain 1 (SAMHD1), mRNA.                                               | -1,22 |
| 400156 ILMN_38819 | PREDICTED: Homo sapiens 40S ribosomal protein S26-like (RPS26L), misc RNA.                            | -1,22 |
| 3927 LASP1        | LIM and SH3 protein 1                                                                                 | -1,22 |
| 2949 GSTM5        | glutathione S-transferase mu 5                                                                        | -1,22 |
| 23495 TNFRSF13B   | tumor necrosis factor receptor superfamily, member 13B                                                | -1,23 |
| 6275 S100A4       | S100 calcium binding protein A4                                                                       | -1,23 |
| 5660 PSAP         | prosaposin                                                                                            | -1,23 |
| 613037 LOC613037  | nuclear pore complex interacting protein pseudogene                                                   | -1,23 |
| ILMN_82386        | Homo sapiens cDNA FLJ32080 fis, clone OCBBF2000015                                                    | -1,23 |
| 170575 GIMAP1     | GTPase, IMAP family member 1                                                                          | -1,23 |
| 23401 FRAT2       | frequently rearranged in advanced T-cell lymphomas 2                                                  | -1,23 |
| 8683 SRSF9        | serine/arginine-rich splicing factor 9                                                                | -1,24 |
| 4831 ILMN_17934   | Homo sapiens non-metastatic cells 2, protein (NM23B) expressed in (NME2), transcript variant 4, mRNA. | -1,24 |
| 4728 NDUFS8       | NADH dehydrogenase (ubiquinone) Fe-S protein 8, 23kDa (NADH-coenzyme Q reductase)                     | -1,24 |
| 645018 ILMN_33646 | PREDICTED: Homo sapiens similar to ribosomal protein S2 (LOC645018), mRNA.                            | -1,24 |
| 2996 ILMN_21264   | Homo sapiens glycophorin E (GYPE), transcript variant 1, mRNA.                                        | -1,24 |
| 1890 TYMP         | thymidine phosphorylase                                                                               | -1,24 |
| 5880 RAC2         | ras-related C3 botulinum toxin substrate 2 (rho family, small GTP binding protein Rac2)               | -1,25 |
| 2802 GOLGA3       | golgin A3                                                                                             | -1,25 |
| 84678 KDM2B       | lysine (K)-specific demethylase 2B                                                                    | -1,25 |
| 51759 C9orf78     | chromosome 9 open reading frame 78                                                                    | -1,25 |
| 83989 FAM172A     | family with sequence similarity 172, member A                                                         | -1,25 |
| 8673 VAMP8        | vesicle-associated membrane protein 8 (endobrevin)                                                    | -1,26 |

|                   |                                                                                                                        |       |
|-------------------|------------------------------------------------------------------------------------------------------------------------|-------|
| 388474 ILMN_39323 | PREDICTED: Homo sapiens similar to 60S ribosomal protein L7a, transcript variant 3 (LOC388474), mRNA.                  | -1,26 |
| 3067 HDC          | histidine decarboxylase                                                                                                | -1,26 |
| 841 CASP8         | caspase 8, apoptosis-related cysteine peptidase                                                                        | -1,26 |
| 6280 S100A9       | S100 calcium binding protein A9                                                                                        | -1,27 |
| 8761 PABPC4       | poly(A) binding protein, cytoplasmic 4 (inducible form)                                                                | -1,27 |
| 8338 HIST2H2AC    | histone cluster 2, H2ac                                                                                                | -1,27 |
| 1629 ILMN_124019  | Homo sapiens dihydrolipoamide branched chain transacylase E2 (DBT), nuclear gene encoding mitochondrial protein, mRNA. | -1,27 |
| 80335 WDR82       | WD repeat domain 82                                                                                                    | -1,28 |
| 92912 UBE2Q2      | ubiquitin-conjugating enzyme E2Q family member 2                                                                       | -1,28 |
| 8148 TAF15        | TAF15 RNA polymerase II, TATA box binding protein (TBP)-associated factor, 68kDa                                       | -1,28 |
| 22828 SCAF8       | SR-related CTD-associated factor 8                                                                                     | -1,28 |
| 5621 PRNP         | prion protein                                                                                                          | -1,28 |
| 64976 MRPL40      | mitochondrial ribosomal protein L40                                                                                    | -1,28 |
| 4245 MGAT1        | mannosyl (alpha-1,3-)-glycoprotein beta-1,2-N-acetylglucosaminyltransferase                                            | -1,28 |
| ILMN_114404       | yu05d06.s1 Soares fetal liver spleen 1NFLS Homo sapiens cDNA clone IMAGE:232907 3, mRNA sequence                       | -1,28 |
| 2733 GLE1         | GLE1 RNA export mediator homolog (yeast)                                                                               | -1,28 |
| 89853 FAM125B     | family with sequence similarity 125, member B                                                                          | -1,28 |
| 834 CASP1         | caspase 1, apoptosis-related cysteine peptidase (interleukin 1, beta, convertase)                                      | -1,28 |
| 65980 BRD9        | bromodomain containing 9                                                                                               | -1,28 |
| 199 AIF1          | allograft inflammatory factor 1                                                                                        | -1,28 |
| 29855 UBN1        | ubinuclein 1                                                                                                           | -1,29 |
| 9045 ILMN_138835  | Homo sapiens ribosomal protein L14 (RPL14), transcript variant 1, mRNA.                                                | -1,29 |
| 9267 CYTH1        | cytohesin 1                                                                                                            | -1,29 |
| 26986 PABPC1      | poly(A) binding protein, cytoplasmic 1                                                                                 | -1,29 |
| 441034 ILMN_31371 | PREDICTED: Homo sapiens similar to 60S ribosomal protein L7a (LOC441034), mRNA.                                        | -1,29 |
| 23258 DENND5A     | DENN/MADD domain containing 5A                                                                                         | -1,29 |
| 9774 ILMN_41406   | Homo sapiens BCL2-associated transcription factor 1 (BCLAF1), transcript variant 2, mRNA.                              | -1,29 |
| 26019 UPF2        | UPF2 regulator of nonsense transcripts homolog (yeast)                                                                 | -1,3  |
| 7311 UBA52        | ubiquitin A-52 residue ribosomal protein fusion product 1                                                              | -1,3  |
| 5937 RBMS1        | RNA binding motif, single stranded interacting protein 1                                                               | -1,3  |
| 389435 ILMN_30712 | Homo sapiens hCG21078 (LOC389435), mRNA.                                                                               | -1,3  |
| 55527 FEM1A       | fem-1 homolog a (C. elegans)                                                                                           | -1,3  |

|                     |                                                                                                       |       |
|---------------------|-------------------------------------------------------------------------------------------------------|-------|
| 8667 EIF3H          | eukaryotic translation initiation factor 3, subunit H                                                 | -1,3  |
| 10078 TSSC4         | tumor suppressing subtransferable candidate 4                                                         | -1,31 |
| 22918 CD93          | CD93 molecule                                                                                         | -1,31 |
| 10961 ERP29         | endoplasmic reticulum protein 29                                                                      | -1,31 |
| 29117 BRD7          | bromodomain containing 7                                                                              | -1,31 |
| 9550 ATP6V1G1       | ATPase, H <sup>+</sup> transporting, lysosomal 13kDa, V1 subunit G1                                   | -1,31 |
| 217 ALDH2           | aldehyde dehydrogenase 2 family (mitochondrial)                                                       | -1,31 |
| 11066 SNRNP35       | small nuclear ribonucleoprotein 35kDa (U11/U12)                                                       | -1,32 |
| 140885 SIRPA        | signal-regulatory protein alpha                                                                       | -1,32 |
| 23198 PSME4         | proteasome (prosome, macropain) activator subunit 4                                                   | -1,32 |
| 9360 PPIG           | peptidylprolyl isomerase G (cyclophilin G)                                                            | -1,32 |
| 8566 PDXK           | pyridoxal (pyridoxine, vitamin B6) kinase                                                             | -1,32 |
| 220988 HNRNPA3      | heterogeneous nuclear ribonucleoprotein A3                                                            | -1,32 |
| 100008589 ILMN_1627 | Homo sapiens 28S ribosomal RNA (LOC100008589), non-coding RNA.                                        | -1,32 |
| 51665 ASB1          | ankyrin repeat and SOCS box containing 1                                                              | -1,32 |
| 54543 TOMM7         | translocase of outer mitochondrial membrane 7 homolog (yeast)                                         | -1,33 |
| 5094 PCBP2          | poly(rC) binding protein 2                                                                            | -1,33 |
| 1476 CSTB           | cystatin B (stefin B)                                                                                 | -1,33 |
| 1108 CHD4           | chromodomain helicase DNA binding protein 4                                                           | -1,33 |
| 115416 C7orf30      | chromosome 7 open reading frame 30                                                                    | -1,33 |
| 9459 ARHGEF6        | Rac/Cdc42 guanine nucleotide exchange factor (GEF) 6                                                  | -1,33 |
| 677 ZFP36L1         | zinc finger protein 36, C3H type-like 1                                                               | -1,34 |
| 7416 VDAC1          | voltage-dependent anion channel 1                                                                     | -1,34 |
| 23029 RBM34         | RNA binding motif protein 34                                                                          | -1,34 |
| 8021 NUP214         | nucleoporin 214kDa                                                                                    | -1,34 |
| 2483 FRG1           | FSHD region gene 1                                                                                    | -1,34 |
| 819 CAMLG           | calcium modulating ligand                                                                             | -1,34 |
| 523 ATP6V1A         | ATPase, H <sup>+</sup> transporting, lysosomal 70kDa, V1 subunit A                                    | -1,34 |
| 200030 ILMN_10536   | Homo sapiens neuroblastoma breakpoint family, member 11-like (LOC200030), mRNA.                       | -1,35 |
| 120364 ILMN_35763   | PREDICTED: Homo sapiens similar to heterogeneous nuclear ribonucleoprotein A1-like (LOC120364), mRNA. | -1,35 |
| 2113 ETS1           | v-ets erythroblastosis virus E26 oncogene homolog 1 (avian)                                           | -1,35 |
| 2000 ELF4           | E74-like factor 4 (ets domain transcription factor)                                                   | -1,35 |
| 79180 EFHD2         | EF-hand domain family, member D2                                                                      | -1,35 |

|        |             |                                                                                                   |       |
|--------|-------------|---------------------------------------------------------------------------------------------------|-------|
| 54915  | YTHDF1      | YTH domain family, member 1                                                                       | -1,36 |
| 57590  | WDFY1       | WD repeat and FYVE domain containing 1                                                            | -1,36 |
| 51669  | TMEM66      | transmembrane protein 66                                                                          | -1,36 |
| 23753  | SDF2L1      | stromal cell-derived factor 2-like 1                                                              | -1,36 |
| 23568  | ARL2BP      | ADP-ribosylation factor-like 2 binding protein                                                    | -1,36 |
| 4938   | OAS1        | 2'-5'-oligoadenylate synthetase 1, 40/46kDa                                                       | -1,37 |
| 728643 | ILMN_183126 | Homo sapiens heterogeneous nuclear ribonucleoprotein A1 pseudogene (LOC728643), non-coding RNA.   | -1,37 |
| 649946 | RPL23AP64   | ribosomal protein L23a pseudogene 64                                                              | -1,37 |
| 648659 | ILMN_31696  | PREDICTED: Homo sapiens similar to ribosomal protein S3a, transcript variant 4 (LOC648659), mRNA. | -1,37 |
| 644131 | CCT8P1      | chaperonin containing TCP1, subunit 8 (theta) pseudogene 1                                        | -1,37 |
| 642817 | ILMN_46700  | PREDICTED: Homo sapiens hypothetical LOC642817 (LOC642817), mRNA.                                 | -1,37 |
| 158345 | ILMN_36732  | PREDICTED: Homo sapiens similar to ribosomal protein L4 (LOC158345), mRNA.                        | -1,37 |
| 3181   | HNRNPA2B1   | heterogeneous nuclear ribonucleoprotein A2/B1                                                     | -1,37 |
| 29799  | YPEL1       | yippee-like 1 (Drosophila)                                                                        | -1,38 |
| 6210   | RPS15A      | ribosomal protein S15a                                                                            | -1,38 |
| 118433 | ILMN_3185   | Homo sapiens ribosomal protein L23a pseudogene 7 (RPL23AP7) on chromosome 2.                      | -1,38 |
| 64981  | MRPL34      | mitochondrial ribosomal protein L34                                                               | -1,38 |
| 22887  | FOXJ3       | forkhead box J3                                                                                   | -1,38 |
| 506    | ATP5B       | ATP synthase, H <sup>+</sup> transporting, mitochondrial F1 complex, beta polypeptide             | -1,38 |
| 25801  | GCA         | grancalcin, EF-hand calcium binding protein                                                       | -1,39 |
| 55602  | CDKN2AIP    | CDKN2A interacting protein                                                                        | -1,39 |
| 22980  | TCF25       | transcription factor 25 (basic helix-loop-helix)                                                  | -1,4  |
| 90007  | MIDN        | midnolin                                                                                          | -1,4  |
| 645688 | ILMN_35293  | PREDICTED: Homo sapiens similar to 60S ribosomal protein L12 (LOC645688), mRNA.                   | -1,4  |
| 10261  | IGSF6       | immunoglobulin superfamily, member 6                                                              | -1,4  |
| 3148   | HMGB2       | high mobility group box 2                                                                         | -1,4  |
| 3301   | DNAJA1      | DnaJ (Hsp40) homolog, subfamily A, member 1                                                       | -1,4  |
| 10212  | DDX39A      | DEAD (Asp-Glu-Ala-Asp) box polypeptide 39A                                                        | -1,4  |
| 6281   | S100A10     | S100 calcium binding protein A10                                                                  | -1,41 |
| 7879   | RAB7A       | RAB7A, member RAS oncogene family                                                                 | -1,41 |
| 4666   | NACA        | nascent polypeptide-associated complex alpha subunit                                              | -1,41 |
| 1915   | EEF1A1      | eukaryotic translation elongation factor 1 alpha 1                                                | -1,41 |
| 121274 | ZNF641      | zinc finger protein 641                                                                           | -1,42 |

|                    |                                                                                                                                                                                        |       |
|--------------------|----------------------------------------------------------------------------------------------------------------------------------------------------------------------------------------|-------|
| 8635 RNASET2       | ribonuclease T2                                                                                                                                                                        | -1,42 |
| 5204 PFDN5         | prefoldin subunit 5                                                                                                                                                                    | -1,42 |
| 4046 LSP1          | lymphocyte-specific protein 1                                                                                                                                                          | -1,42 |
| 23117 ILMN_44181   | PREDICTED: Homo sapiens KIAA0220-like protein, transcript variant 16 (LOC23117), mRNA.                                                                                                 | -1,42 |
| 3128 HLA-DRB6      | major histocompatibility complex, class II, DR beta 6 (pseudogene)                                                                                                                     | -1,42 |
| 1973 EIF4A1        | eukaryotic translation initiation factor 4A1                                                                                                                                           | -1,42 |
| 11033 ADAP1        | ArfGAP with dual PH domains 1                                                                                                                                                          | -1,42 |
| 81556 C15orf44     | chromosome 15 open reading frame 44                                                                                                                                                    | -1,42 |
| 7705 ZNF146        | zinc finger protein 146                                                                                                                                                                | -1,43 |
| 7532 YWHAG         | tyrosine 3-monooxygenase/tryptophan 5-monooxygenase activation protein, gamma polypeptide                                                                                              | -1,43 |
| 9349 RPL23         | ribosomal protein L23                                                                                                                                                                  | -1,43 |
| 5788 PTPRC         | protein tyrosine phosphatase, receptor type, C                                                                                                                                         | -1,43 |
| 650518 ILMN_39973  | PREDICTED: Homo sapiens similar to Proteasome subunit alpha type 6 (Proteasome iota chain) (Macropain iota chain) (Multicatalytic endopeptidase complex iota chain) (LOC650518), mRNA. | -1,43 |
| ILMN_98835         | dq02f02.y1 NIH_MGC_2 Homo sapiens cDNA clone IMAGE:2846715 3, mRNA sequence                                                                                                            | -1,43 |
| 54504 CPVL         | carboxypeptidase, vitellogenic-like                                                                                                                                                    | -1,43 |
| 5859 QARS          | glutaminyl-tRNA synthetase                                                                                                                                                             | -1,44 |
| 401992 ILMN_138791 | PREDICTED: Homo sapiens olfactory receptor, family 2, subfamily T, member 2 (OR2T2), mRNA.                                                                                             | -1,44 |
| 4818 NKG7          | natural killer cell group 7 sequence                                                                                                                                                   | -1,44 |
| 653232 ILMN_41130  | PREDICTED: Homo sapiens hypothetical LOC653232, transcript variant 4 (LOC653232), mRNA.                                                                                                | -1,44 |
| 389137 LOC389137   | armadillo repeat containing 10 pseudogene                                                                                                                                              | -1,44 |
| 3939 LDHA          | lactate dehydrogenase A                                                                                                                                                                | -1,44 |
| 3126 ILMN_18172    | Homo sapiens major histocompatibility complex, class II, DR beta 4 (HLA-DRB4), mRNA.                                                                                                   | -1,44 |
| 10961 ERP29        | endoplasmic reticulum protein 29                                                                                                                                                       | -1,44 |
| 7327 UBE2G2        | ubiquitin-conjugating enzyme E2G 2                                                                                                                                                     | -1,45 |
| 6595 SMARCA2       | SWI/SNF related, matrix associated, actin dependent regulator of chromatin, subfamily a, member 2                                                                                      | -1,45 |
| 22934 RPIA         | ribose 5-phosphate isomerase A                                                                                                                                                         | -1,45 |
| 79717 ILMN_25951   | Homo sapiens phosphopantothienoylcysteine synthetase (PPCS), transcript variant 1, mRNA.                                                                                               | -1,45 |
| 651149 ILMN_36491  | PREDICTED: Homo sapiens similar to 60S ribosomal protein L3 (L4) (LOC651149), mRNA.                                                                                                    | -1,46 |
| 642250 ILMN_44960  | Homo sapiens hCG39912 (LOC642250), mRNA.                                                                                                                                               | -1,46 |
| 3310 HSPA6         | heat shock 70kDa protein 6 (HSP70B')                                                                                                                                                   | -1,46 |
| 120425 AMICA1      | adhesion molecule, interacts with CXADR antigen 1                                                                                                                                      | -1,46 |
| 6234 RPS28         | ribosomal protein S28                                                                                                                                                                  | -1,47 |

|                  |                                                                              |       |
|------------------|------------------------------------------------------------------------------|-------|
| 10578 GNLY       | granulysin                                                                   | -1,47 |
| 9337 CNOT8       | CCR4-NOT transcription complex, subunit 8                                    | -1,47 |
| 6136 RPL12       | ribosomal protein L12                                                        | -1,47 |
| 694 BTG1         | B-cell translocation gene 1, anti-proliferative                              | -1,47 |
| 308 ANXA5        | annexin A5                                                                   | -1,47 |
| 91746 YTHDC1     | YTH domain containing 1                                                      | -1,48 |
| 9589 WTAP        | Wilms tumor 1 associated protein                                             | -1,48 |
| 25777 SUN2       | Sad1 and UNC84 domain containing 2                                           | -1,48 |
| 57665 RDH14      | retinol dehydrogenase 14 (all-trans/9-cis/11-cis)                            | -1,48 |
| 5898 RALA        | v-ral simian leukemia viral oncogene homolog A (ras related)                 | -1,48 |
| 23420 ILMN_1736  | Homo sapiens NODAL modulator 1 (NOMO1), mRNA.                                | -1,48 |
| 8837 ILMN_4321   | Homo sapiens CASP8 and FADD-like apoptosis regulator (CFLAR), mRNA.          | -1,48 |
| 28958 CCDC56     | coiled-coil domain containing 56                                             | -1,48 |
| 7919 DDX39B      | DEAD (Asp-Glu-Ala-Asp) box polypeptide 39B                                   | -1,48 |
| 8682 PEA15       | phosphoprotein enriched in astrocytes 15                                     | -1,49 |
| 6205 RPS11       | ribosomal protein S11                                                        | -1,49 |
| 10608 MXD4       | MAX dimerization protein 4                                                   | -1,5  |
| 4048 LTA4H       | leukotriene A4 hydrolase                                                     | -1,5  |
| 5788 PTPRC       | protein tyrosine phosphatase, receptor type, C                               | -1,51 |
| 146722 ILMN_4334 | Homo sapiens CD300 molecule-like family member f (CD300LF), mRNA.            | -1,51 |
| 7175 TPR         | translocated promoter region (to activated MET oncogene)                     | -1,52 |
| 6625 SNRNP70     | small nuclear ribonucleoprotein 70kDa (U1)                                   | -1,52 |
| 27303 RBMS3      | RNA binding motif, single stranded interacting protein 3                     | -1,52 |
| 9045 RPL14       | ribosomal protein L14                                                        | -1,52 |
| 2971 GTF3A       | general transcription factor IIIA                                            | -1,52 |
| 1387 CREBBP      | CREB binding protein                                                         | -1,52 |
| 4706 NDUFAB1     | NADH dehydrogenase (ubiquinone) 1, alpha/beta subcomplex, 1, 8kDa            | -1,53 |
| 1642 DDB1        | damage-specific DNA binding protein 1, 127kDa                                | -1,53 |
| 8725 C19orf2     | chromosome 19 open reading frame 2                                           | -1,53 |
| 3001 GZMA        | granzyme A (granzyme 1, cytotoxic T-lymphocyte-associated serine esterase 3) | -1,54 |
| 80777 CYB5B      | cytochrome b5 type B (outer mitochondrial membrane)                          | -1,54 |
| 6204 RPS10       | ribosomal protein S10                                                        | -1,55 |
| 9867 PJA2        | praja ring finger 2                                                          | -1,55 |



|                   |                                                                                                                                                                                                                                     |       |
|-------------------|-------------------------------------------------------------------------------------------------------------------------------------------------------------------------------------------------------------------------------------|-------|
| 57819 LSM2        | LSM2 homolog, U6 small nuclear RNA associated ( <i>S. cerevisiae</i> )                                                                                                                                                              | -1,55 |
| 10581 IFITM2      | interferon induced transmembrane protein 2 (1-8D)                                                                                                                                                                                   | -1,55 |
| 389674 ILMN_38391 | PREDICTED: Homo sapiens heterogeneous nuclear ribonucleoprotein A1 pseudogene 4 (HNRPA1P4), mRNA.                                                                                                                                   | -1,55 |
| 2734 GLG1         | golgi glycoprotein 1                                                                                                                                                                                                                | -1,55 |
| 4736 RPL10A       | ribosomal protein L10a                                                                                                                                                                                                              | -1,56 |
| 5694 PSMB6        | proteasome (prosome, macropain) subunit, beta type, 6                                                                                                                                                                               | -1,56 |
| 64397 ZFP106      | zinc finger protein 106 homolog (mouse)                                                                                                                                                                                             | -1,57 |
| 7305 TYROBP       | TYRO protein tyrosine kinase binding protein                                                                                                                                                                                        | -1,57 |
| 6229 RPS24        | ribosomal protein S24                                                                                                                                                                                                               | -1,57 |
| 6128 RPL6         | ribosomal protein L6                                                                                                                                                                                                                | -1,57 |
| 6228 RPS23        | ribosomal protein S23                                                                                                                                                                                                               | -1,57 |
| 653232 ILMN_31434 | PREDICTED: Homo sapiens hypothetical LOC653232, transcript variant 4 (LOC653232), mRNA.                                                                                                                                             | -1,57 |
| 829 CAPZA1        | capping protein (actin filament) muscle Z-line, alpha 1                                                                                                                                                                             | -1,57 |
| 94104 GCFC1       | GC-rich sequence DNA-binding factor 1                                                                                                                                                                                               | -1,57 |
| 11224 ILMN_11814  | Homo sapiens ribosomal protein L35 (RPL35), mRNA.                                                                                                                                                                                   | -1,58 |
| 4716 NDUFB10      | NADH dehydrogenase (ubiquinone) 1 beta subcomplex, 10, 22kDa                                                                                                                                                                        | -1,58 |
| 23048 FNBP1       | formin binding protein 1                                                                                                                                                                                                            | -1,58 |
| 1968 EIF2S3       | eukaryotic translation initiation factor 2, subunit 3 gamma, 52kDa                                                                                                                                                                  | -1,58 |
| 26135 SERBP1      | SERPINE1 mRNA binding protein 1                                                                                                                                                                                                     | -1,59 |
| 5687 PSMA6        | proteasome (prosome, macropain) subunit, alpha type, 6                                                                                                                                                                              | -1,59 |
| 388275 ILMN_39089 | PREDICTED: Homo sapiens similar to Heterogeneous nuclear ribonucleoprotein A1 (Helix-destabilizing protein) (Single-strand binding protein) (hnRNP core protein A1) (HDP-1) (Topoisomerase-inhibitor suppressed) (LOC388275), mRNA. | -1,59 |
| 6426 SRSF1        | serine/arginine-rich splicing factor 1                                                                                                                                                                                              | -1,6  |
| 6205 RPS11        | ribosomal protein S11                                                                                                                                                                                                               | -1,6  |
| 650646 ILMN_46687 | PREDICTED: Homo sapiens similar to 40S ribosomal protein S26 (LOC650646), mRNA.                                                                                                                                                     | -1,6  |
| 3295 HSD17B4      | hydroxysteroid (17-beta) dehydrogenase 4                                                                                                                                                                                            | -1,6  |
| 7555 CNBP         | CCHC-type zinc finger, nucleic acid binding protein                                                                                                                                                                                 | -1,6  |
| 29121 ILMN_138738 | Homo sapiens C-type lectin domain family 2, member D (CLEC2D), transcript variant 1, mRNA.                                                                                                                                          | -1,6  |
| 960 CD44          | CD44 molecule (Indian blood group)                                                                                                                                                                                                  | -1,6  |
| 90416 C15orf57    | chromosome 15 open reading frame 57                                                                                                                                                                                                 | -1,6  |
| 5265 SERPINA1     | serpin peptidase inhibitor, clade A (alpha-1 antiproteinase, antitrypsin), member 1                                                                                                                                                 | -1,61 |
| 6217 RPS16        | ribosomal protein S16                                                                                                                                                                                                               | -1,61 |



|                    |                                                                                                                                 |       |
|--------------------|---------------------------------------------------------------------------------------------------------------------------------|-------|
| 6169 RPL38         | ribosomal protein L38                                                                                                           | -1,61 |
| 11158 RABL2B       | RAB, member of RAS oncogene family-like 2B                                                                                      | -1,61 |
| 646350 ILMN_39634  | PREDICTED: Homo sapiens similar to 60S ribosomal protein L39 (LOC646350), mRNA.                                                 | -1,61 |
| 2212 FCGR2A        | Fc fragment of IgG, low affinity IIa, receptor (CD32)                                                                           | -1,61 |
| 55729 ATF7IP       | activating transcription factor 7 interacting protein                                                                           | -1,61 |
| 328 APEX1          | APEX nuclease (multifunctional DNA repair enzyme) 1                                                                             | -1,61 |
| 6124 ILMN_21554    | Homo sapiens ribosomal protein L4 (RPL4), mRNA.                                                                                 | -1,62 |
| 10181 RBM5         | RNA binding motif protein 5                                                                                                     | -1,62 |
| 441032 ILMN_46443  | PREDICTED: Homo sapiens similar to eukaryotic translation elongation factor 1 alpha 1, transcript variant 11 (LOC441032), mRNA. | -1,62 |
| 155038 ILMN_6869   | Homo sapiens GTPase, IMAP family member 8 (GIMAP8), mRNA.                                                                       | -1,62 |
| 50854 C6orf48      | chromosome 6 open reading frame 48                                                                                              | -1,62 |
| 6128 RPL6          | ribosomal protein L6                                                                                                            | -1,63 |
| 10250 SRRM1        | serine/arginine repetitive matrix 1                                                                                             | -1,64 |
| 3184 HNRNPD        | heterogeneous nuclear ribonucleoprotein D (AU-rich element RNA binding protein 1, 37kDa)                                        | -1,64 |
| 81929 SEH1L        | SEH1-like (S. cerevisiae)                                                                                                       | -1,65 |
| 6230 RPS25         | ribosomal protein S25                                                                                                           | -1,65 |
| 23484 LEPROTL1     | leptin receptor overlapping transcript-like 1                                                                                   | -1,65 |
| 54518 APBB1IP      | amyloid beta (A4) precursor protein-binding, family B, member 1 interacting protein                                             | -1,65 |
| 6224 RPS20         | ribosomal protein S20                                                                                                           | -1,66 |
| 6139 RPL17         | ribosomal protein L17                                                                                                           | -1,66 |
| 51667 NUB1         | negative regulator of ubiquitin-like proteins 1                                                                                 | -1,66 |
| 4050 LTB           | lymphotoxin beta (TNF superfamily, member 3)                                                                                    | -1,66 |
| 2268 FGR           | Gardner-Rasheed feline sarcoma viral (v-fgr) oncogene homolog                                                                   | -1,66 |
| 64411 ARAP3        | ArfGAP with RhoGAP domain, ankyrin repeat and PH domain 3                                                                       | -1,66 |
| 6235 RPS29         | ribosomal protein S29                                                                                                           | -1,67 |
| 57162 PELI1        | pellino homolog 1 (Drosophila)                                                                                                  | -1,67 |
| 606724 ILMN_9207   | Homo sapiens coronin, actin binding protein, 1A pseudogene (LOC606724), non-coding RNA.                                         | -1,67 |
| 6222 RPS18         | ribosomal protein S18                                                                                                           | -1,68 |
| 3071 NCKAP1L       | NCK-associated protein 1-like                                                                                                   | -1,68 |
| 664709 HNRNPA1P10  | heterogeneous nuclear ribonucleoprotein A1 pseudogene 10                                                                        | -1,68 |
| 81576 CCDC130      | coiled-coil domain containing 130                                                                                               | -1,68 |
| 390354 ILMN_138133 | PREDICTED: Homo sapiens similar to ribosomal protein L18a; 60S ribosomal protein L18a, transcript variant 36                    | -1,69 |

|                   |                                                                                                     |       |
|-------------------|-----------------------------------------------------------------------------------------------------|-------|
|                   | (LOC390354), misc RNA.                                                                              |       |
| 1938 EEF2         | eukaryotic translation elongation factor 2                                                          | -1,69 |
| 64333 ARHGAP9     | Rho GTPase activating protein 9                                                                     | -1,69 |
| 10628 TXNIP       | thioredoxin interacting protein                                                                     | -1,7  |
| 9984 THOC1        | THO complex 1                                                                                       | -1,7  |
| 4809 NHP2L1       | NHP2 non-histone chromosome protein 2-like 1 ( <i>S. cerevisiae</i> )                               | -1,7  |
| 8751 ADAM15       | ADAM metalloproteinase domain 15                                                                    | -1,7  |
| 7431 VIM          | vimentin                                                                                            | -1,71 |
| 400156 ILMN_27668 | Homo sapiens 40S ribosomal protein S26-like (RPS26L), non-coding RNA.                               | -1,71 |
| 5547 PRCP         | prolylcarboxypeptidase (angiotensinase C)                                                           | -1,72 |
| 136143 ILMN_32715 | PREDICTED: Homo sapiens similar to ribosomal protein L18 (LOC136143), mRNA.                         | -1,72 |
| 10399 GNB2L1      | guanine nucleotide binding protein (G protein), beta polypeptide 2-like 1                           | -1,72 |
| 64771 C6orf106    | chromosome 6 open reading frame 106                                                                 | -1,72 |
| 27013 CNPPD1      | cyclin Pas1/PHO80 domain containing 1                                                               | -1,72 |
| 7538 ZFP36        | zinc finger protein 36, C3H type, homolog (mouse)                                                   | -1,73 |
| 6194 RPS6         | ribosomal protein S6                                                                                | -1,73 |
| 6230 RPS25        | ribosomal protein S25                                                                               | -1,73 |
| 168537 GIMAP7     | GTPase, IMAP family member 7                                                                        | -1,73 |
| 5435 POLR2F       | polymerase (RNA) II (DNA directed) polypeptide F                                                    | -1,74 |
| 6778 STAT6        | signal transducer and activator of transcription 6, interleukin-4 induced                           | -1,75 |
| 64744 SMAP2       | small ArfGAP2                                                                                       | -1,75 |
| 6232 RPS27        | ribosomal protein S27                                                                               | -1,75 |
| 80223 RAB11FIP1   | RAB11 family interacting protein 1 (class I)                                                        | -1,75 |
| 648343 ILMN_42525 | PREDICTED: Homo sapiens similar to protein phosphatase 1 regulatory subunit 14B (LOC648343), mRNA.  | -1,75 |
| 3183 ILMN_24356   | Homo sapiens heterogeneous nuclear ribonucleoprotein C (C1/C2) (HNRPC), transcript variant 1, mRNA. | -1,75 |
| 746 C11orf10      | chromosome 11 open reading frame 10                                                                 | -1,75 |
| 650298 ILMN_42423 | PREDICTED: Homo sapiens similar to 40S ribosomal protein S26 (LOC650298), mRNA.                     | -1,76 |
| 8721 EDF1         | endothelial differentiation-related factor 1                                                        | -1,76 |
| 10694 CCT8        | chaperonin containing TCP1, subunit 8 (theta)                                                       | -1,76 |
| 6168 RPL37A       | ribosomal protein L37a                                                                              | -1,77 |
| 644992 ILMN_33996 | PREDICTED: Homo sapiens hypothetical LOC644992 (LOC644992), mRNA.                                   | -1,77 |
| 144983 HNRNPA1L2  | heterogeneous nuclear ribonucleoprotein A1-like 2                                                   | -1,77 |
| 23180 RFTN1       | raftlin, lipid raft linker 1                                                                        | -1,78 |

|                   |                                                                                                            |       |
|-------------------|------------------------------------------------------------------------------------------------------------|-------|
| 7940 LST1         | leukocyte specific transcript 1                                                                            | -1,78 |
| 6230 RPS25        | ribosomal protein S25                                                                                      | -1,78 |
| 221092 HNRNPUL2   | heterogeneous nuclear ribonucleoprotein U-like 2                                                           | -1,78 |
| 3128 HLA-DRB6     | major histocompatibility complex, class II, DR beta 6 (pseudogene)                                         | -1,78 |
| 79081 C11orf48    | chromosome 11 open reading frame 48                                                                        | -1,78 |
| 23478 SEC11A      | SEC11 homolog A ( <i>S. cerevisiae</i> )                                                                   | -1,79 |
| 6132 RPL8         | ribosomal protein L8                                                                                       | -1,79 |
| 6234 RPS28        | ribosomal protein S28                                                                                      | -1,79 |
| 1958 EGR1         | early growth response 1                                                                                    | -1,79 |
| 11159 RABL2A      | RAB, member of RAS oncogene family-like 2A                                                                 | -1,8  |
| 5720 PSME1        | proteasome (prosome, macropain) activator subunit 1 (PA28 alpha)                                           | -1,8  |
| 6128 RPL6         | ribosomal protein L6                                                                                       | -1,8  |
| 3125 HLA-DRB3     | major histocompatibility complex, class II, DR beta 3                                                      | -1,8  |
| 8364 HIST1H4C     | histone cluster 1, H4c                                                                                     | -1,8  |
| 3268 AGFG2        | ArfGAP with FG repeats 2                                                                                   | -1,8  |
| 6129 RPL7         | ribosomal protein L7                                                                                       | -1,81 |
| 3303 HSPA1A       | heat shock 70kDa protein 1A                                                                                | -1,81 |
| 521 ATP5I         | ATP synthase, H <sup>+</sup> transporting, mitochondrial Fo complex, subunit E                             | -1,81 |
| 6741 SSB          | Sjogren syndrome antigen B (autoantigen La)                                                                | -1,82 |
| 6688 SPI1         | spleen focus forming virus (SFFV) proviral integration oncogene spi1                                       | -1,82 |
| 25832 NBPF14      | neuroblastoma breakpoint family, member 14                                                                 | -1,82 |
| 284821 ILMN_43560 | PREDICTED: Homo sapiens similar to ribosomal protein L13a (LOC284821), mRNA.                               | -1,82 |
| 2214 ILMN_181791  | Homo sapiens Fc fragment of IgG, low affinity IIIa, receptor (CD16a) (FCGR3A), transcript variant 1, mRNA. | -1,82 |
| 10922 FASTK       | Fas-activated serine/threonine kinase                                                                      | -1,82 |
| 151636 ILMN_14733 | Homo sapiens deltex 3-like ( <i>Drosophila</i> ) (DTX3L), mRNA.                                            | -1,82 |
| 64781 CERK        | ceramide kinase                                                                                            | -1,82 |
| 6430 SRSF5        | serine/arginine-rich splicing factor 5                                                                     | -1,83 |
| 6141 RPL18        | ribosomal protein L18                                                                                      | -1,83 |
| 23405 DICER1      | dicer 1, ribonuclease type III                                                                             | -1,83 |
| 402694 ILMN_32451 | Homo sapiens similar to ribosomal protein L15 (LOC402694), mRNA.                                           | -1,83 |
| 2319 FLOT2        | flotillin 2                                                                                                | -1,83 |
| 54543 TOMM7       | translocase of outer mitochondrial membrane 7 homolog (yeast)                                              | -1,84 |
| 6637 ILMN_30298   | Homo sapiens small nuclear ribonucleoprotein polypeptide G (SNRPG), mRNA.                                  | -1,84 |

|                   |                                                                                                                                                                                                                                    |       |
|-------------------|------------------------------------------------------------------------------------------------------------------------------------------------------------------------------------------------------------------------------------|-------|
| 6633 SNRPD2       | small nuclear ribonucleoprotein D2 polypeptide 16.5kDa                                                                                                                                                                             | -1,84 |
| 6427 SRSF2        | serine/arginine-rich splicing factor 2                                                                                                                                                                                             | -1,84 |
| 730316 ILMN_28309 | PREDICTED: Homo sapiens similar to Nuclear envelope pore membrane protein POM 121 (Pore membrane protein of 121 kDa) (P145) (LOC730316), mRNA.                                                                                     | -1,84 |
| 643949 ILMN_35406 | PREDICTED: Homo sapiens similar to 60S acidic ribosomal protein P2 (LOC643949), mRNA.                                                                                                                                              | -1,84 |
| 643284 ILMN_40380 | PREDICTED: Homo sapiens similar to 40S ribosomal protein S29 (LOC643284), mRNA.                                                                                                                                                    | -1,84 |
| 84619 ZGPAT       | zinc finger, CCCH-type with G patch domain                                                                                                                                                                                         | -1,85 |
| 6231 RPS26        | ribosomal protein S26                                                                                                                                                                                                              | -1,85 |
| 5204 PFDN5        | prefoldin subunit 5                                                                                                                                                                                                                | -1,85 |
| 8665 EIF3F        | eukaryotic translation initiation factor 3, subunit F                                                                                                                                                                              | -1,85 |
| 1654 DDX3X        | DEAD (Asp-Glu-Ala-Asp) box polypeptide 3, X-linked                                                                                                                                                                                 | -1,85 |
| 5073 PARN         | poly(A)-specific ribonuclease                                                                                                                                                                                                      | -1,86 |
| 649548 ILMN_31442 | PREDICTED: Homo sapiens similar to 60S ribosomal protein L32 (LOC649548), mRNA.                                                                                                                                                    | -1,86 |
| 440396 ILMN_45411 | Homo sapiens similar to Heterogeneous nuclear ribonucleoprotein A1 (Helix-destabilizing protein) (Single-strand binding protein) (hnRNP core protein A1) (HDP-1) (Topoisomerase-inhibitor suppressed) (LOC440396), non-coding RNA. | -1,86 |
| 221960 C7orf28B   | chromosome 7 open reading frame 28B                                                                                                                                                                                                | -1,86 |
| 9168 TMSB10       | thymosin beta 10                                                                                                                                                                                                                   | -1,87 |
| 29101 SSU72       | SSU72 RNA polymerase II CTD phosphatase homolog ( <i>S. cerevisiae</i> )                                                                                                                                                           | -1,87 |
| 51187 RSL24D1     | ribosomal L24 domain containing 1                                                                                                                                                                                                  | -1,87 |
| 6176 RPLP1        | ribosomal protein, large, P1                                                                                                                                                                                                       | -1,87 |
| 6169 RPL38        | ribosomal protein L38                                                                                                                                                                                                              | -1,87 |
| 5265 SERPINA1     | serpin peptidase inhibitor, clade A (alpha-1 antiproteinase, antitrypsin), member 1                                                                                                                                                | -1,88 |
| 6235 RPS29        | ribosomal protein S29                                                                                                                                                                                                              | -1,88 |
| 645 BLVRB         | biliverdin reductase B (flavin reductase (NADPH))                                                                                                                                                                                  | -1,88 |
| 54440 SASH3       | SAM and SH3 domain containing 3                                                                                                                                                                                                    | -1,89 |
| ILMN_111893       | full-length cDNA clone CS0DI056YK21 of Placenta Cot 25-normalized of Homo sapiens (human)                                                                                                                                          | -1,89 |
| 29924 EPN1        | epsin 1                                                                                                                                                                                                                            | -1,89 |
| 5018 OXA1L        | oxidase (cytochrome c) assembly 1-like                                                                                                                                                                                             | -1,9  |
| 7940 LST1         | leukocyte specific transcript 1                                                                                                                                                                                                    | -1,91 |
| 648622 ILMN_42936 | PREDICTED: Homo sapiens similar to ribosomal protein S27 (LOC648622), mRNA.                                                                                                                                                        | -1,91 |
| 389672 ILMN_35589 | PREDICTED: Homo sapiens similar to 40S ribosomal protein SA (p40) (34/67 kDa laminin receptor) (Colon carcinoma laminin-binding protein) (NEM/1CHD4) (Multidrug resistance-associated protein MGr1-Ag), transcript variant 3       | -1,91 |

|                   |                                                                                                                         |       |
|-------------------|-------------------------------------------------------------------------------------------------------------------------|-------|
|                   | (LOC389672), mRNA.                                                                                                      |       |
| 23163 GGA3        | golgi-associated, gamma adaptin ear containing, ARF binding protein 3                                                   | -1,91 |
| 1666 DECR1        | 2,4-dienoyl CoA reductase 1, mitochondrial                                                                              | -1,91 |
| 7454 WAS          | Wiskott-Aldrich syndrome (eczema-thrombocytopenia)                                                                      | -1,92 |
| 7430 EZR          | ezrin                                                                                                                   | -1,92 |
| 6232 RPS27        | ribosomal protein S27                                                                                                   | -1,93 |
| 4691 NCL          | nucleolin                                                                                                               | -1,93 |
| 146053 ILMN_40640 | PREDICTED: Homo sapiens similar to ribosomal protein S3a, transcript variant 4 (LOC146053), mRNA.                       | -1,93 |
| 56910 STARD7      | StAR-related lipid transfer (START) domain containing 7                                                                 | -1,94 |
| 5547 PRCP         | prolylcarboxypeptidase (angiotensinase C)                                                                               | -1,94 |
| 3312 HSPA8        | heat shock 70kDa protein 8                                                                                              | -1,94 |
| 3320 HSP90AA1     | heat shock protein 90kDa alpha (cytosolic), class A member 1                                                            | -1,94 |
| 1915 EEF1A1       | eukaryotic translation elongation factor 1 alpha 1                                                                      | -1,94 |
| 387066 ILMN_38384 | PREDICTED: Homo sapiens chromosome 6 open reading frame 160, transcript variant 4 (C6orf160), mRNA.                     | -1,94 |
| 4708 NDUFB2       | NADH dehydrogenase (ubiquinone) 1 beta subcomplex, 2, 8kDa                                                              | -1,95 |
| 651202 ILMN_45225 | PREDICTED: Homo sapiens similar to large subunit ribosomal protein L36a (LOC651202), mRNA.                              | -1,95 |
| 3123 HLA-DRB1     | major histocompatibility complex, class II, DR beta 1                                                                   | -1,95 |
| 64333 ARHGAP9     | Rho GTPase activating protein 9                                                                                         | -1,95 |
| 51234 TMEM85      | transmembrane protein 85                                                                                                | -1,96 |
| 402251 ILMN_45342 | PREDICTED: Homo sapiens similar to eukaryotic translation elongation factor 1 alpha 2 (LOC402251), mRNA.                | -1,96 |
| 6161 RPL32        | ribosomal protein L32                                                                                                   | -1,97 |
| 56655 POLE4       | polymerase (DNA-directed), epsilon 4 (p12 subunit)                                                                      | -1,97 |
| 651894 ILMN_34885 | PREDICTED: Homo sapiens similar to ribosomal protein S12 (LOC651894), mRNA.                                             | -1,97 |
| 645899 ILMN_42597 | PREDICTED: Homo sapiens similar to 40S ribosomal protein S28 (LOC645899), mRNA.                                         | -1,97 |
| 168537 GIMAP7     | GTPase, IMAP family member 7                                                                                            | -1,97 |
| 6046 BRD2         | bromodomain containing 2                                                                                                | -1,97 |
| 3385 ICAM3        | intercellular adhesion molecule 3                                                                                       | -1,98 |
| 6136 RPL12        | ribosomal protein L12                                                                                                   | -1,99 |
| 10424 PGRMC2      | progesterone receptor membrane component 2                                                                              | -1,99 |
| 644604 EEF1A1P12  | eukaryotic translation elongation factor 1 alpha 1 pseudogene 12                                                        | -1,99 |
| ILMN_72502        | Homo sapiens cDNA FLJ31407 fis, clone NT2NE2000137                                                                      | -1,99 |
| 3117 ILMN_41173   | PREDICTED: Homo sapiens major histocompatibility complex, class II, DQ alpha 1, transcript variant 10 (HLA-DQA1), mRNA. | -1,99 |

|                   |                                                                                                                                                                                                  |       |
|-------------------|--------------------------------------------------------------------------------------------------------------------------------------------------------------------------------------------------|-------|
| 23167 EFR3A       | EFR3 homolog A ( <i>S. cerevisiae</i> )                                                                                                                                                          | -1,99 |
| 1915 EEF1A1       | eukaryotic translation elongation factor 1 alpha 1                                                                                                                                               | -1,99 |
| 1350 COX7C        | cytochrome c oxidase subunit VIIc                                                                                                                                                                | -1,99 |
| 9184 BUB3         | budding uninhibited by benzimidazoles 3 homolog (yeast)                                                                                                                                          | -1,99 |
| 6193 RPS5         | ribosomal protein S5                                                                                                                                                                             | -2    |
| 128346 C1orf162   | chromosome 1 open reading frame 162                                                                                                                                                              | -2,01 |
| 6279 S100A8       | S100 calcium binding protein A8                                                                                                                                                                  | -2,02 |
| 7297 TYK2         | tyrosine kinase 2                                                                                                                                                                                | -2,03 |
| 6206 RPS12        | ribosomal protein S12                                                                                                                                                                            | -2,03 |
| 7979 SHFM1        | split hand/foot malformation (ectrodactyly) type 1                                                                                                                                               | -2,04 |
| 6235 RPS29        | ribosomal protein S29                                                                                                                                                                            | -2,04 |
| 9219 MTA2         | metastasis associated 1 family, member 2                                                                                                                                                         | -2,04 |
| 647361 ILMN_37525 | PREDICTED: Homo sapiens similar to 40S ribosomal protein S29 (LOC647361), mRNA.                                                                                                                  | -2,04 |
| 10437 IFI30       | interferon, gamma-inducible protein 30                                                                                                                                                           | -2,04 |
| 1716 DGUOK        | deoxyguanosine kinase                                                                                                                                                                            | -2,04 |
| 648210 ILMN_40930 | PREDICTED: Homo sapiens similar to Heterogeneous nuclear ribonucleoprotein A1 (Helix-destabilizing protein) (Single-strand RNA-binding protein) (hnRNP core protein A1) (HDP) (LOC648210), mRNA. | -2,05 |
| 6128 RPL6         | ribosomal protein L6                                                                                                                                                                             | -2,05 |
| 23019 CNOT1       | CCR4-NOT transcription complex, subunit 1                                                                                                                                                        | -2,05 |
| 6194 RPS6         | ribosomal protein S6                                                                                                                                                                             | -2,06 |
| 6188 RPS3         | ribosomal protein S3                                                                                                                                                                             | -2,06 |
| 645737 ILMN_44612 | PREDICTED: Homo sapiens similar to 60S ribosomal protein L7, transcript variant 1 (LOC645737), mRNA.                                                                                             | -2,06 |
| 645683 RPL13AP3   | ribosomal protein L13a pseudogene 3                                                                                                                                                              | -2,06 |
| 10983 CCNI        | cyclin I                                                                                                                                                                                         | -2,06 |
| 6741 SSB          | Sjogren syndrome antigen B (autoantigen La)                                                                                                                                                      | -2,07 |
| 6256 RXRA         | retinoid X receptor, alpha                                                                                                                                                                       | -2,07 |
| 22827 PUF60       | poly-U binding splicing factor 60KDa                                                                                                                                                             | -2,08 |
| 6159 RPL29        | ribosomal protein L29                                                                                                                                                                            | -2,08 |
| 440733 ILMN_38430 | PREDICTED: Homo sapiens similar to 40S ribosomal protein S15 (RIG protein) (LOC440733), mRNA.                                                                                                    | -2,08 |
| ILMN_102288       | Human mRNA for T-cell specific protein                                                                                                                                                           | -2,08 |
| 9991 ROD1         | ROD1 regulator of differentiation 1 ( <i>S. pombe</i> )                                                                                                                                          | -2,09 |
| 284058 KIAA1267   | KIAA1267                                                                                                                                                                                         | -2,09 |
| 201895 C4orf34    | chromosome 4 open reading frame 34                                                                                                                                                               | -2,1  |

|                    |                                                                                                                                                                                                                                     |       |
|--------------------|-------------------------------------------------------------------------------------------------------------------------------------------------------------------------------------------------------------------------------------|-------|
| 645436 ILMN_31983  | PREDICTED: Homo sapiens similar to Heterogeneous nuclear ribonucleoprotein A1 (Helix-destabilizing protein) (Single-strand binding protein) (hnRNP core protein A1) (HDP-1) (Topoisomerase-inhibitor suppressed) (LOC645436), mRNA. | -2,11 |
| 6129 RPL7          | ribosomal protein L7                                                                                                                                                                                                                | -2,11 |
| 402057 ILMN_181541 | Homo sapiens similar to 40S ribosomal protein S17 (LOC402057), mRNA.                                                                                                                                                                | -2,11 |
| 401019 ILMN_35511  | PREDICTED: Homo sapiens similar to 40S ribosomal protein S15 (RIG protein), transcript variant 3 (LOC401019), mRNA.                                                                                                                 | -2,11 |
| 1615 DARS          | aspartyl-tRNA synthetase                                                                                                                                                                                                            | -2,11 |
| 6235 RPS29         | ribosomal protein S29                                                                                                                                                                                                               | -2,12 |
| 6125 RPL5          | ribosomal protein L5                                                                                                                                                                                                                | -2,12 |
| 9516 LITAF         | lipopolysaccharide-induced TNF factor                                                                                                                                                                                               | -2,12 |
| 10521 DDX17        | DEAD (Asp-Glu-Ala-Asp) box polypeptide 17                                                                                                                                                                                           | -2,12 |
| 84881 RPU4D        | RNA pseudouridylate synthase domain containing 4                                                                                                                                                                                    | -2,13 |
| 6191 RPS4X         | ribosomal protein S4, X-linked                                                                                                                                                                                                      | -2,13 |
| 6176 RPLP1         | ribosomal protein, large, P1                                                                                                                                                                                                        | -2,13 |
| 441124 ILMN_8311   | PREDICTED: Homo sapiens hypothetical LOC441124 (LOC441124), mRNA.                                                                                                                                                                   | -2,13 |
| 6134 RPL10         | ribosomal protein L10                                                                                                                                                                                                               | -2,15 |
| 6191 RPS4X         | ribosomal protein S4, X-linked                                                                                                                                                                                                      | -2,16 |
| 5920 RARRES3       | retinoic acid receptor responder (tazarotene induced) 3                                                                                                                                                                             | -2,16 |
| 1975 EIF4B         | eukaryotic translation initiation factor 4B                                                                                                                                                                                         | -2,16 |
| 7555 CNBP          | CCHC-type zinc finger, nucleic acid binding protein                                                                                                                                                                                 | -2,16 |
| 83880 ILMN_9478    | Homo sapiens IFP38 (IFP38), mRNA.                                                                                                                                                                                                   | -2,17 |
| 3431 SP110         | SP110 nuclear body protein                                                                                                                                                                                                          | -2,18 |
| 6223 RPS19         | ribosomal protein S19                                                                                                                                                                                                               | -2,18 |
| 6122 RPL3          | ribosomal protein L3                                                                                                                                                                                                                | -2,18 |
| 2799 GNS           | glucosamine (N-acetyl)-6-sulfatase                                                                                                                                                                                                  | -2,18 |
| 552891 ILMN_29106  | Homo sapiens DNAJC25-GNG10 readthrough (DNAJC25-GNG10), mRNA.                                                                                                                                                                       | -2,18 |
| 6218 RPS17         | ribosomal protein S17                                                                                                                                                                                                               | -2,19 |
| 6159 RPL29         | ribosomal protein L29                                                                                                                                                                                                               | -2,19 |
| 390876 ILMN_35719  | PREDICTED: Homo sapiens similar to 60S ribosomal protein L35 (LOC390876), mRNA.                                                                                                                                                     | -2,19 |
| 388524 ILMN_27037  | Homo sapiens similar to Laminin receptor 1 (LOC388524), mRNA.                                                                                                                                                                       | -2,2  |
| 6134 RPL10         | ribosomal protein L10                                                                                                                                                                                                               | -2,2  |
| 648000 ILMN_32447  | PREDICTED: Homo sapiens similar to 60S ribosomal protein L7, transcript variant 1 (LOC648000), mRNA.                                                                                                                                | -2,22 |

|                   |                                                                                                                                             |       |
|-------------------|---------------------------------------------------------------------------------------------------------------------------------------------|-------|
| 3312 HSPA8        | heat shock 70kDa protein 8                                                                                                                  | -2,22 |
| 994 CDC25B        | cell division cycle 25 homolog B (S. pombe)                                                                                                 | -2,22 |
| 6152 RPL24        | ribosomal protein L24                                                                                                                       | -2,23 |
| 7157 ILMN_11285   | Homo sapiens tumor protein p53 (TP53), mRNA.                                                                                                | -2,24 |
| 1937 EEF1G        | eukaryotic translation elongation factor 1 gamma                                                                                            | -2,24 |
| 6146 RPL22        | ribosomal protein L22                                                                                                                       | -2,24 |
| 10657 KHDRBS1     | KH domain containing, RNA binding, signal transduction associated 1                                                                         | -2,24 |
| 6208 RPS14        | ribosomal protein S14                                                                                                                       | -2,25 |
| 391656 ILMN_43142 | PREDICTED: Homo sapiens similar to hCG1640454 (LOC391656), mRNA.                                                                            | -2,26 |
| 1933 EEF1B2       | eukaryotic translation elongation factor 1 beta 2                                                                                           | -2,26 |
| 55748 CNDP2       | CNDP dipeptidase 2 (metallopeptidase M20 family)                                                                                            | -2,26 |
| 4688 ILMN_8146    | Homo sapiens neutrophil cytosolic factor 2 (65kDa, chronic granulomatous disease, autosomal 2) (NCF2), mRNA.                                | -2,27 |
| 6152 RPL24        | ribosomal protein L24                                                                                                                       | -2,27 |
| 440737 ILMN_39347 | PREDICTED: Homo sapiens similar to 60S ribosomal protein L35 (LOC440737), mRNA.                                                             | -2,27 |
| 388122 ILMN_37996 | PREDICTED: Homo sapiens hypothetical LOC388122 (LOC388122), mRNA.                                                                           | -2,27 |
| 27335 EIF3K       | eukaryotic translation initiation factor 3, subunit K                                                                                       | -2,27 |
| 64115 ILMN_174163 | Homo sapiens chromosome 10 open reading frame 54 (C10orf54), mRNA.                                                                          | -2,27 |
| 6187 RPS2         | ribosomal protein S2                                                                                                                        | -2,28 |
| 1936 EEF1D        | eukaryotic translation elongation factor 1 delta (guanine nucleotide exchange protein)                                                      | -2,28 |
| 23589 CARHSP1     | calcium regulated heat stable protein 1, 24kDa                                                                                              | -2,28 |
| 303 ANXA2P1       | annexin A2 pseudogene 1                                                                                                                     | -2,28 |
| 27430 ILMN_18923  | Homo sapiens methionine adenosyltransferase II, beta (MAT2B), transcript variant 1, mRNA.                                                   | -2,29 |
| 56616 DIABLO      | diablo, IAP-binding mitochondrial protein                                                                                                   | -2,29 |
| 2091 FBL          | fibrillarin                                                                                                                                 | -2,3  |
| 6189 RPS3A        | ribosomal protein S3A                                                                                                                       | -2,31 |
| 51371 POMP        | proteasome maturation protein                                                                                                               | -2,31 |
| 6129 RPL7         | ribosomal protein L7                                                                                                                        | -2,31 |
| 644037 HNRNPA1P12 | heterogeneous nuclear ribonucleoprotein A1 pseudogene 12                                                                                    | -2,31 |
| 10288 ILMN_180674 | Homo sapiens leukocyte immunoglobulin-like receptor, subfamily B (with TM and ITIM domains), member 2 (LILRB2), transcript variant 2, mRNA. | -2,31 |
| 81606 LBH         | limb bud and heart development homolog (mouse)                                                                                              | -2,31 |
| 3420 IDH3B        | isocitrate dehydrogenase 3 (NAD+) beta                                                                                                      | -2,31 |
| 23480 SEC61G      | Sec61 gamma subunit                                                                                                                         | -2,32 |



|                   |                                                                                                                                                                                                                                                 |       |
|-------------------|-------------------------------------------------------------------------------------------------------------------------------------------------------------------------------------------------------------------------------------------------|-------|
| 6166 RPL36AL      | ribosomal protein L36a-like                                                                                                                                                                                                                     | -2,32 |
| 6165 RPL35A       | ribosomal protein L35a                                                                                                                                                                                                                          | -2,32 |
| 10724 ILMN_11399  | Homo sapiens meningioma expressed antigen 5 (hyaluronidase) (MGEA5), mRNA.                                                                                                                                                                      | -2,32 |
| 6166 RPL36AL      | ribosomal protein L36a-like                                                                                                                                                                                                                     | -2,34 |
| 653773 ILMN_44662 | PREDICTED: Homo sapiens similar to ribosomal protein L31 (LOC653773), mRNA.                                                                                                                                                                     | -2,34 |
| 346950 ILMN_36919 | PREDICTED: Homo sapiens similar to ribosomal protein L37 (LOC346950), mRNA.                                                                                                                                                                     | -2,34 |
| 9750 ILMN_21545   | Homo sapiens family with sequence similarity 65, member B (FAM65B), transcript variant 2, mRNA.                                                                                                                                                 | -2,34 |
| 3646 EIF3E        | eukaryotic translation initiation factor 3, subunit E                                                                                                                                                                                           | -2,35 |
| 8906 AP1G2        | adaptor-related protein complex 1, gamma 2 subunit                                                                                                                                                                                              | -2,35 |
| 11100 HNRNPUL1    | heterogeneous nuclear ribonucleoprotein U-like 1                                                                                                                                                                                                | -2,36 |
| 6142 RPL18A       | ribosomal protein L18a                                                                                                                                                                                                                          | -2,39 |
| 441246 ILMN_31934 | PREDICTED: Homo sapiens similar to 60S ribosomal protein L35, transcript variant 1 (LOC441246), mRNA.                                                                                                                                           | -2,39 |
| 4170 MCL1         | myeloid cell leukemia sequence 1 (BCL2-related)                                                                                                                                                                                                 | -2,4  |
| 441377 ILMN_31681 | PREDICTED: Homo sapiens similar to 40S ribosomal protein S26 (LOC441377), mRNA.                                                                                                                                                                 | -2,4  |
| 6142 RPL18A       | ribosomal protein L18a                                                                                                                                                                                                                          | -2,42 |
| 11224 RPL35       | ribosomal protein L35                                                                                                                                                                                                                           | -2,42 |
| 3727 ILMN_29325   | Homo sapiens jun D proto-oncogene (JUND), mRNA.                                                                                                                                                                                                 | -2,42 |
| 6207 RPS13        | ribosomal protein S13                                                                                                                                                                                                                           | -2,43 |
| 648249 ILMN_33635 | PREDICTED: Homo sapiens similar to 40S ribosomal protein SA (p40) (34/67 kDa laminin receptor) (Colon carcinoma laminin-binding protein) (NEM/1CHD4) (Multidrug resistance-associated protein MGr1-Ag), transcript variant 3 (LOC648249), mRNA. | -2,43 |
| 3687 ILMN_7741    | Homo sapiens integrin, alpha X (complement component 3 receptor 4 subunit) (ITGAX), mRNA.                                                                                                                                                       | -2,43 |
| 1933 EEF1B2       | eukaryotic translation elongation factor 1 beta 2                                                                                                                                                                                               | -2,43 |
| 6133 RPL9         | ribosomal protein L9                                                                                                                                                                                                                            | -2,44 |
| 6144 RPL21        | ribosomal protein L21                                                                                                                                                                                                                           | -2,44 |
| 652624 ILMN_46806 | PREDICTED: Homo sapiens similar to 40S ribosomal protein SA (p40) (34/67 kDa laminin receptor) (LOC652624), mRNA.                                                                                                                               | -2,44 |
| 644604 EEF1A1P12  | eukaryotic translation elongation factor 1 alpha 1 pseudogene 12                                                                                                                                                                                | -2,44 |
| 402057 ILMN_40648 | Homo sapiens similar to 40S ribosomal protein S17 (LOC402057), mRNA.                                                                                                                                                                            | -2,45 |
| 51316 PLAC8       | placenta-specific 8                                                                                                                                                                                                                             | -2,46 |
| 142 ILMN_3056     | Homo sapiens poly (ADP-ribose) polymerase family, member 1 (PARP1), mRNA.                                                                                                                                                                       | -2,46 |
| 51335 NGRN        | neugrin, neurite outgrowth associated                                                                                                                                                                                                           | -2,47 |
| 728973 ILMN_38370 | PREDICTED: Homo sapiens similar to 40S ribosomal protein S7 (S8) (LOC728973), mRNA.                                                                                                                                                             | -2,47 |

|                   |                                                                                                                                                                                                                           |       |
|-------------------|---------------------------------------------------------------------------------------------------------------------------------------------------------------------------------------------------------------------------|-------|
| 387867 ILMN_34982 | PREDICTED: Homo sapiens similar to 40S ribosomal protein SA (p40) (34/67 kDa laminin receptor) (Colon carcinoma laminin-binding protein) (NEM/1CHD4) (Multidrug resistance-associated protein MGr1-Ag) (LOC387867), mRNA. | -2,47 |
| 2219 FCN1         | ficolin (collagen/fibrinogen domain containing) 1                                                                                                                                                                         | -2,47 |
| 647856 ILMN_42194 | PREDICTED: Homo sapiens similar to 40S ribosomal protein SA (p40) (34/67 kDa laminin receptor) (Colon carcinoma laminin-binding protein) (NEM/1CHD4) (Multidrug resistance-associated protein MGr1-Ag) (LOC647856), mRNA. | -2,48 |
| 645385 ILMN_33113 | PREDICTED: Homo sapiens similar to heterogeneous nuclear ribonucleoprotein A1 (LOC645385), mRNA.                                                                                                                          | -2,48 |
| 8721 EDF1         | endothelial differentiation-related factor 1                                                                                                                                                                              | -2,48 |
| 6139 RPL17        | ribosomal protein L17                                                                                                                                                                                                     | -2,49 |
| 81609 SNX27       | sorting nexin family member 27                                                                                                                                                                                            | -2,5  |
| 1933 ILMN_4325    | Homo sapiens eukaryotic translation elongation factor 1 beta 2 (EEF1B2), transcript variant 3, mRNA.                                                                                                                      | -2,5  |
| 50856 ILMN_8463   | Homo sapiens C-type lectin domain family 4, member A (CLEC4A), transcript variant 4, mRNA.                                                                                                                                | -2,51 |
| 6142 RPL18A       | ribosomal protein L18a                                                                                                                                                                                                    | -2,52 |
| 5777 PTPN6        | protein tyrosine phosphatase, non-receptor type 6                                                                                                                                                                         | -2,52 |
| 9991 ROD1         | ROD1 regulator of differentiation 1 (S. pombe)                                                                                                                                                                            | -2,53 |
| 6209 RPS15        | ribosomal protein S15                                                                                                                                                                                                     | -2,54 |
| 27069 GHITM       | growth hormone inducible transmembrane protein                                                                                                                                                                            | -2,54 |
| 2130 EWSR1        | Ewing sarcoma breakpoint region 1                                                                                                                                                                                         | -2,54 |
| 11180 WDR6        | WD repeat domain 6                                                                                                                                                                                                        | -2,55 |
| 6208 RPS14        | ribosomal protein S14                                                                                                                                                                                                     | -2,55 |
| 644029 ILMN_34790 | PREDICTED: Homo sapiens similar to 60S ribosomal protein L7a (LOC644029), mRNA.                                                                                                                                           | -2,55 |
| 6209 RPS15        | ribosomal protein S15                                                                                                                                                                                                     | -2,57 |
| 6210 RPS15A       | ribosomal protein S15a                                                                                                                                                                                                    | -2,59 |
| 6155 RPL27        | ribosomal protein L27                                                                                                                                                                                                     | -2,6  |
| 152007 GLIPR2     | GLI pathogenesis-related 2                                                                                                                                                                                                | -2,6  |
| 10146 G3BP1       | GTPase activating protein (SH3 domain) binding protein 1                                                                                                                                                                  | -2,6  |
| 6233 RPS27A       | ribosomal protein S27a                                                                                                                                                                                                    | -2,63 |
| 5997 RGS2         | regulator of G-protein signaling 2, 24kDa                                                                                                                                                                                 | -2,63 |
| 4332 MNDA         | myeloid cell nuclear differentiation antigen                                                                                                                                                                              | -2,64 |
| 654194 ILMN_31988 | PREDICTED: Homo sapiens similar to ribosomal protein S27 (LOC654194), mRNA.                                                                                                                                               | -2,66 |
| 6203 RPS9         | ribosomal protein S9                                                                                                                                                                                                      | -2,67 |
| 864 RUNX3         | runt-related transcription factor 3                                                                                                                                                                                       | -2,68 |
| 5162 PDHB         | pyruvate dehydrogenase (lipoamide) beta                                                                                                                                                                                   | -2,68 |
| 3329 HSPD1        | heat shock 60kDa protein 1 (chaperonin)                                                                                                                                                                                   | -2,68 |

|        |            |                                                                                                             |       |
|--------|------------|-------------------------------------------------------------------------------------------------------------|-------|
| 4714   | NDUFB8     | NADH dehydrogenase (ubiquinone) 1 beta subcomplex, 8, 19kDa                                                 | -2,69 |
| 3921   | ILMN_27800 | Homo sapiens ribosomal protein SA (RPSA), transcript variant 1, mRNA.                                       | -2,7  |
| 6203   | RPS9       | ribosomal protein S9                                                                                        | -2,73 |
| 3326   | HSP90AB1   | heat shock protein 90kDa alpha (cytosolic), class B member 1                                                | -2,73 |
| 653314 | ILMN_31607 | Homo sapiens similar to ribosomal protein L19 (LOC653314), mRNA.                                            | -2,75 |
| 7529   | YWHAB      | tyrosine 3-monooxygenase/tryptophan 5-monooxygenase activation protein, beta polypeptide                    | -2,76 |
| 2113   | ETS1       | v-ets erythroblastosis virus E26 oncogene homolog 1 (avian)                                                 | -2,76 |
| 4670   | HNRNPM     | heterogeneous nuclear ribonucleoprotein M                                                                   | -2,77 |
| 10412  | NSA2       | NSA2 ribosome biogenesis homolog (S. cerevisiae)                                                            | -2,79 |
| 6217   | RPS16      | ribosomal protein S16                                                                                       | -2,79 |
| 2197   | FAU        | Finkel-Biskis-Reilly murine sarcoma virus (FBR-MuSV) ubiquitously expressed                                 | -2,79 |
| 6170   | RPL39      | ribosomal protein L39                                                                                       | -2,8  |
| 6472   | SHMT2      | serine hydroxymethyltransferase 2 (mitochondrial)                                                           | -2,82 |
| 651436 | ILMN_39119 | PREDICTED: Homo sapiens similar to ribosomal protein L9 (LOC651436), mRNA.                                  | -2,84 |
| 6232   | RPS27      | ribosomal protein S27                                                                                       | -2,86 |
| 23524  | SRRM2      | serine/arginine repetitive matrix 2                                                                         | -2,87 |
| 125144 | ILMN_6167  | Homo sapiens chromosome 17 open reading frame 45 (C17orf45), mRNA.                                          | -2,89 |
| 6722   | ILMN_22299 | Homo sapiens serum response factor (c-fos serum response element-binding transcription factor) (SRF), mRNA. | -2,9  |
| 8241   | RBM10      | RNA binding motif protein 10                                                                                | -2,91 |
| 4050   | LTB        | lymphotoxin beta (TNF superfamily, member 3)                                                                | -2,91 |
| 3122   | HLA-DRA    | major histocompatibility complex, class II, DR alpha                                                        | -2,94 |
| 1937   | EEF1G      | eukaryotic translation elongation factor 1 gamma                                                            | -2,97 |
| 972    | CD74       | CD74 molecule, major histocompatibility complex, class II invariant chain                                   | -2,99 |
| 55571  | C2orf29    | chromosome 2 open reading frame 29                                                                          | -3,02 |
| 79026  | AHNAK      | AHNAK nucleoprotein                                                                                         | -3,02 |
| 6218   | RPS17      | ribosomal protein S17                                                                                       | -3,03 |
| 3550   | IK         | IK cytokine, down-regulator of HLA II                                                                       | -3,03 |
| 59339  | PLEKHA2    | pleckstrin homology domain containing, family A (phosphoinositide binding specific) member 2                | -3,04 |
| 3184   | HNRNPD     | heterogeneous nuclear ribonucleoprotein D (AU-rich element RNA binding protein 1, 37kDa)                    | -3,05 |
| 6156   | RPL30      | ribosomal protein L30                                                                                       | -3,09 |
| 353514 | LILRA5     | leukocyte immunoglobulin-like receptor, subfamily A (with TM domain), member 5                              | -3,12 |
| 29997  | GLTSCR2    | glioma tumor suppressor candidate region gene 2                                                             | -3,12 |
| 6143   | RPL19      | ribosomal protein L19                                                                                       | -3,15 |

|       |             |                                                                                                                                                        |       |
|-------|-------------|--------------------------------------------------------------------------------------------------------------------------------------------------------|-------|
| 10365 | KLF2        | Kruppel-like factor 2 (lung)                                                                                                                           | -3,17 |
| 1974  | EIF4A2      | eukaryotic translation initiation factor 4A2                                                                                                           | -3,19 |
| 972   | CD74        | CD74 molecule, major histocompatibility complex, class II invariant chain                                                                              | -3,19 |
| 3689  | ITGB2       | integrin, beta 2 (complement component 3 receptor 3 and 4 subunit)                                                                                     | -3,2  |
| 302   | ANXA2       | annexin A2                                                                                                                                             | -3,2  |
| 684   | BST2        | bone marrow stromal cell antigen 2                                                                                                                     | -3,22 |
| 6160  | RPL31       | ribosomal protein L31                                                                                                                                  | -3,26 |
| 526   | ATP6V1B2    | ATPase, H <sup>+</sup> transporting, lysosomal 56/58kDa, V1 subunit B2                                                                                 | -3,27 |
| 3936  | LCP1        | lymphocyte cytosolic protein 1 (L-plastin)                                                                                                             | -3,49 |
| 3689  | ILMN_138267 | Homo sapiens integrin, beta 2 (antigen CD18 (p95), lymphocyte function-associated antigen 1; macrophage antigen 1 (mac-1) beta subunit) (ITGB2), mRNA. | -3,54 |
| 678   | ZFP36L2     | zinc finger protein 36, C3H type-like 2                                                                                                                | -3,62 |
| 3122  | HLA-DRA     | major histocompatibility complex, class II, DR alpha                                                                                                   | -3,62 |
| 4069  | LYZ         | lysozyme                                                                                                                                               | -3,88 |

Supplementary Table S2: List of deregulated genes in serum of treated patients in comparison to serum of healthy individuals ( $p < 0.05$ ,  $\log FC \geq 1$ ).

**Supplementary Table S2.**

List of deregulated genes in serum of treated patients in comparison to serum of healthy individuals ( $p < 0.05$ ,  $\log FC \geq 1$ ).

| ENTREZ Gene ID | Symbol   | Gene Name                                                                      | logFC |
|----------------|----------|--------------------------------------------------------------------------------|-------|
| 8736           | MYOM1    | myomesin 1, 185kDa                                                             | 4     |
| 3690           | ITGB3    | integrin, beta 3 (platelet glycoprotein IIIa, antigen CD61)                    | 3,8   |
| 8407           | TAGLN2   | transgelin 2                                                                   | 3,77  |
| 9240           | PNMA1    | paraneoplastic antigen MA1                                                     | 3,7   |
| 3796           | KIF2A    | kinesin heavy chain member 2A                                                  | 3,67  |
| 27102          | EIF2AK1  | eukaryotic translation initiation factor 2-alpha kinase 1                      | 3,6   |
| 6648           | SOD2     | superoxide dismutase 2, mitochondrial                                          | 3,55  |
| 25907          | TMEM158  | transmembrane protein 158 (gene/pseudogene)                                    | 3,54  |
| 4900           | NRGN     | neurogranin (protein kinase C substrate, RC3)                                  | 3,44  |
| 58497          | PRUNE    | prune homolog (Drosophila)                                                     | 3,38  |
| 400073         | C12orf76 | chromosome 12 open reading frame 76                                            | 3,34  |
| 51257          | C3HC4    | membrane-associated ring finger (C3HC4) 2                                      | 3,28  |
| 87             | ACTN1    | actinin, alpha 1                                                               | 3,2   |
| 7414           | VCL      | vinculin                                                                       | 3,19  |
| 10867          | TSPAN9   | tetraspanin 9                                                                  | 3,12  |
| 2108           | ETFA     | electron-transfer-flavoprotein, alpha polypeptide                              | 3,12  |
| 2791           | GNG11    | guanine nucleotide binding protein (G protein), gamma 11                       | 3,06  |
| 8848           | TSC22D1  | TSC22 domain family, member 1                                                  | 3,05  |
| 2040           | STOM     | stomatin                                                                       | 3,02  |
| 10653          | SPINT2   | serine peptidase inhibitor, Kunitz type, 2                                     | 3,01  |
| 5110           | PCMT1    | protein-L-isoaspartate (D-aspartate) O-methyltransferase                       | 3,01  |
| 830            | CAPZA2   | capping protein (actin filament) muscle Z-line, alpha 2                        | 3,01  |
| 7035           | TFPI     | tissue factor pathway inhibitor (lipoprotein-associated coagulation inhibitor) | 2,98  |

|                  |                                                                                     |      |
|------------------|-------------------------------------------------------------------------------------|------|
| 8407 TAGLN2      | transgelin 2                                                                        | 2,96 |
| 83699 ILMN_9801  | Homo sapiens SH3 domain binding glutamic acid-rich protein like 2 (SH3BGRL2), mRNA. | 2,96 |
| 5889 RAD51C      | RAD51 homolog C ( <i>S. cerevisiae</i> )                                            | 2,94 |
| 8349 ILMN_28293  | Homo sapiens histone cluster 2, H2be (HIST2H2BE), mRNA.                             | 2,91 |
| 55755 CDK5RAP2   | CDK5 regulatory subunit associated protein 2                                        | 2,9  |
| 10826 C5orf4     | chromosome 5 open reading frame 4                                                   | 2,88 |
| 351 APP          | amyloid beta (A4) precursor protein                                                 | 2,88 |
| 7035 TFPI        | tissue factor pathway inhibitor (lipoprotein-associated coagulation inhibitor)      | 2,87 |
| 89872 AQP10      | aquaporin 10                                                                        | 2,85 |
| 10611 PDLIM5     | PDZ and LIM domain 5                                                                | 2,82 |
| 3934 LCN2        | lipocalin 2                                                                         | 2,82 |
| 3987 LIMS1       | LIM and senescent cell antigen-like domains 1                                       | 2,81 |
| 444 ASPH         | aspartate beta-hydroxylase                                                          | 2,8  |
| 8545 CGGBP1      | CGG triplet repeat binding protein 1                                                | 2,79 |
| 145781 GCOM1     | GRINL1A complex locus                                                               | 2,75 |
| 5154 PDGFA       | platelet-derived growth factor alpha polypeptide                                    | 2,74 |
| 8992 ATP6V0E1    | ATPase, H <sup>+</sup> transporting, lysosomal 9kDa, V0 subunit e1                  | 2,74 |
| 28996 HIPK2      | homeodomain interacting protein kinase 2                                            | 2,73 |
| 9948 WDR1        | WD repeat domain 1                                                                  | 2,72 |
| 196527 ANO6      | anoctamin 6                                                                         | 2,72 |
| 4673 NAP1L1      | nucleosome assembly protein 1-like 1                                                | 2,7  |
| 8459 TPST2       | tyrosylprotein sulfotransferase 2                                                   | 2,69 |
| 10666 CD226      | CD226 molecule                                                                      | 2,69 |
| 51266 CLEC1B     | C-type lectin domain family 1, member B                                             | 2,68 |
| 9910 RABGAP1L    | RAB GTPase activating protein 1-like                                                | 2,65 |
| 8440 NCK2        | NCK adaptor protein 2                                                               | 2,65 |
| 9848 MFAP3L      | microfibrillar-associated protein 3-like                                            | 2,65 |
| 1200 ILMN_19883  | Homo sapiens tripeptidyl peptidase I (TPP1), mRNA.                                  | 2,64 |
| 5816 PVALB       | parvalbumin                                                                         | 2,64 |
| 25994 HIGD1A     | HIG1 hypoxia inducible domain family, member 1A                                     | 2,64 |
| 54741 ILMN_27032 | Homo sapiens leptin receptor overlapping transcript (LEPROT), mRNA.                 | 2,63 |
| 27292 DIMT1      | DIM1 dimethyladenosine transferase 1 homolog ( <i>S. cerevisiae</i> )               | 2,63 |
| 340205 TREML1    | triggering receptor expressed on myeloid cells-like 1                               | 2,61 |

|                   |                                                                                                     |      |
|-------------------|-----------------------------------------------------------------------------------------------------|------|
| 51109 RDH11       | retinol dehydrogenase 11 (all-trans/9-cis/11-cis)                                                   | 2,61 |
| 7456 WIPF1        | WAS/WASL interacting protein family, member 1                                                       | 2,6  |
| 5725 PTBP1        | polypyrimidine tract binding protein 1                                                              | 2,6  |
| 2983 GUCY1B3      | guanylate cyclase 1, soluble, beta 3                                                                | 2,6  |
| 4218 RAB8A        | RAB8A, member RAS oncogene family                                                                   | 2,58 |
| 5567 PRKACB       | protein kinase, cAMP-dependent, catalytic, beta                                                     | 2,58 |
| 649260 ILMN_35781 | PREDICTED: Homo sapiens similar to LIM and senescent cell antigen-like domains 1 (LOC649260), mRNA. | 2,57 |
| 3987 LIMS1        | LIM and senescent cell antigen-like domains 1                                                       | 2,57 |
| 3693 ITGB5        | integrin, beta 5                                                                                    | 2,57 |
| 2017 CTTN         | cortactin                                                                                           | 2,56 |
| 1069 CETN2        | centrin, EF-hand protein, 2                                                                         | 2,56 |
| 8417 STX7         | syntaxin 7                                                                                          | 2,55 |
| 2162 F13A1        | coagulation factor XIII, A1 polypeptide                                                             | 2,55 |
| 10079 ATP9A       | ATPase, class II, type 9A                                                                           | 2,55 |
| 401232 ILMN_11265 | Homo sapiens hypothetical protein DKFZp686I15217 (DKFZp686I15217), mRNA.                            | 2,53 |
| 4638 MYLK         | myosin light chain kinase                                                                           | 2,52 |
| ILMN_72868        | TCAAP1D4752 Pediatric acute myelogenous leukemia cell (FAB M1) , mRNA sequence                      | 2,51 |
| 3017 HIST1H2BD    | histone cluster 1, H2bd                                                                             | 2,48 |
| 7057 THBS1        | thrombospondin 1                                                                                    | 2,47 |
| 2982 GUCY1A3      | guanylate cyclase 1, soluble, alpha 3                                                               | 2,46 |
| 222166 C7orf41    | chromosome 7 open reading frame 41                                                                  | 2,46 |
| 55845 BRK1        | BRICK1, SCAR/WAVE actin-nucleating complex subunit                                                  | 2,44 |
| 3688 ITGB1        | integrin, beta 1 (fibronectin receptor, beta polypeptide, antigen CD29 includes MDF2, MSK12)        | 2,43 |
| 55353 LAPTM4B     | lysosomal protein transmembrane 4 beta                                                              | 2,42 |
| 10217 CTDSPL      | CTD (carboxy-terminal domain, RNA polymerase II, polypeptide A) small phosphatase-like              | 2,42 |
| 400073 C12orf76   | chromosome 12 open reading frame 76                                                                 | 2,42 |
| 401232 ILMN_11265 | Homo sapiens hypothetical protein DKFZp686I15217 (DKFZp686I15217), mRNA.                            | 2,41 |
| 222658 KCTD20     | potassium channel tetramerisation domain containing 20                                              | 2,4  |
| 3688 ITGB1        | integrin, beta 1 (fibronectin receptor, beta polypeptide, antigen CD29 includes MDF2, MSK12)        | 2,4  |
| 402 ARL2          | ADP-ribosylation factor-like 2                                                                      | 2,4  |
| 5627 PROS1        | protein S (alpha)                                                                                   | 2,39 |
| 81027 TUBB1       | tubulin, beta 1                                                                                     | 2,38 |
| 351 APP           | amyloid beta (A4) precursor protein                                                                 | 2,38 |

|        |             |                                                                                             |      |
|--------|-------------|---------------------------------------------------------------------------------------------|------|
| 644422 | ILMN_34341  | PREDICTED: Homo sapiens misc_RNA (LOC644422), miscRNA.                                      | 2,37 |
| 1998   | ELF2        | E74-like factor 2 (ets domain transcription factor)                                         | 2,37 |
| 5476   | CTSA        | cathepsin A                                                                                 | 2,37 |
| 286006 | C7orf53     | chromosome 7 open reading frame 53                                                          | 2,37 |
| 7414   | VCL         | vinculin                                                                                    | 2,36 |
| 2664   | ILMN_13492  | Homo sapiens GDP dissociation inhibitor 1 (GDI1), mRNA.                                     | 2,35 |
| 23429  | RYBP        | RING1 and YY1 binding protein                                                               | 2,34 |
| 8655   | DYNLL1      | dynein, light chain, LC8-type 1                                                             | 2,34 |
| 51706  | CYB5R1      | cytochrome b5 reductase 1                                                                   | 2,33 |
| 7531   | YWHAE       | tyrosine 3-monooxygenase/tryptophan 5-monooxygenase activation protein, epsilon polypeptide | 2,32 |
| 64407  | RGS18       | regulator of G-protein signaling 18                                                         | 2,32 |
| 64795  | RMND5A      | required for meiotic nuclear division 5 homolog A (S. cerevisiae)                           | 2,31 |
| 10611  | PDLIM5      | PDZ and LIM domain 5                                                                        | 2,31 |
| 3580   | ILMN_139000 | PREDICTED: Homo sapiens interleukin 8 receptor, beta pseudogene (IL8RBP), misc RNA.         | 2,31 |
| 55294  | FBXW7       | F-box and WD repeat domain containing 7                                                     | 2,31 |
| 5742   | ILMN_3001   | Homo sapiens prostaglandin-endoperoxide synthase 1 (PTGS1), transcript variant 2, mRNA.     | 2,3  |
| 3987   | LIMS1       | LIM and senescent cell antigen-like domains 1                                               | 2,29 |
| 8655   | DYNLL1      | dynein, light chain, LC8-type 1                                                             | 2,29 |
| 6374   | CXCL5       | chemokine (C-X-C motif) ligand 5                                                            | 2,29 |
| 83706  | FERMT3      | fermitin family member 3                                                                    | 2,28 |
| 5413   | ILMN_139223 | Homo sapiens septin 5 (SEPT5), mRNA.                                                        | 2,27 |
| 23531  | MMD         | monocyte to macrophage differentiation-associated                                           | 2,27 |
| 63933  | CCDC90A     | coiled-coil domain containing 90A                                                           | 2,27 |
| 55132  | LARP1B      | La ribonucleoprotein domain family, member 1B                                               | 2,26 |
| 2149   | ILMN_25961  | Homo sapiens coagulation factor II (thrombin) receptor (F2R), mRNA.                         | 2,25 |
| 23558  | WBP2        | WW domain binding protein 2                                                                 | 2,24 |
| 8345   | HIST1H2BH   | histone cluster 1, H2bh                                                                     | 2,23 |
| 948    | CD36        | CD36 molecule (thrombospondin receptor)                                                     | 2,23 |
| 7533   | YWHAH       | tyrosine 3-monooxygenase/tryptophan 5-monooxygenase activation protein, eta polypeptide     | 2,22 |
| 5795   | PTPRJ       | protein tyrosine phosphatase, receptor type, J                                              | 2,22 |
| 2876   | ILMN_10376  | Homo sapiens glutathione peroxidase 1 (GPX1), transcript variant 2, mRNA.                   | 2,22 |
| 10398  | MYL9        | myosin, light chain 9, regulatory                                                           | 2,21 |
| 25994  | HIGD1A      | HIG1 hypoxia inducible domain family, member 1A                                             | 2,2  |



|        |             |                                                                                                             |      |
|--------|-------------|-------------------------------------------------------------------------------------------------------------|------|
| 643319 | ILMN_41137  | PREDICTED: Homo sapiens similar to Transgelin-2 (LOC643319), mRNA.                                          | 2,18 |
| 112495 | GTF3C6      | general transcription factor IIIC, polypeptide 6, alpha 35kDa                                               | 2,18 |
| 5494   | PPM1A       | protein phosphatase, Mg2+/Mn2+ dependent, 1A                                                                | 2,17 |
| 26052  | DNM3        | dynammin 3                                                                                                  | 2,17 |
| 4953   | ODC1        | ornithine decarboxylase 1                                                                                   | 2,16 |
| 54516  | ILMN_182901 | Homo sapiens mitochondrial translational release factor 1-like (MTRF1L), mRNA.                              | 2,16 |
| 4211   | MEIS1       | Meis homeobox 1                                                                                             | 2,16 |
| 5867   | ILMN_14453  | Homo sapiens RAB4A, member RAS oncogene family (RAB4A), mRNA.                                               | 2,15 |
| 27018  | NGFRAP1     | nerve growth factor receptor (TNFRSF16) associated protein 1                                                | 2,15 |
| 4267   | CD99        | CD99 molecule                                                                                               | 2,15 |
| 286451 | YIPF6       | Yip1 domain family, member 6                                                                                | 2,14 |
| 8848   | TSC22D1     | TSC22 domain family, member 1                                                                               | 2,14 |
| 442124 | ILMN_37787  | PREDICTED: Homo sapiens hypothetical LOC442124 (LOC442124), mRNA.                                           | 2,14 |
| 387820 | ILMN_26714  | PREDICTED: Homo sapiens similar to DnaJ (Hsp40) homolog, subfamily B, member 6 isoform a (LOC387820), mRNA. | 2,13 |
| 643253 | CCT6P1      | chaperonin containing TCP1, subunit 6 (zeta) pseudogene 1                                                   | 2,13 |
| 3146   | HMGB1       | high mobility group box 1                                                                                   | 2,12 |
| 6648   | SOD2        | superoxide dismutase 2, mitochondrial                                                                       | 2,11 |
| 139105 | ILMN_3923   | Homo sapiens chromosome X open reading frame 20 (CXorf20), mRNA.                                            | 2,11 |
| 9848   | MFAP3L      | microfibrillar-associated protein 3-like                                                                    | 2,1  |
| 401629 | ILMN_14074  | Homo sapiens hypothetical LOC401629 (LOC401629), non-coding RNA.                                            | 2,1  |
| 54469  | ZFAND6      | zinc finger, AN1-type domain 6                                                                              | 2,09 |
| 7504   | XK          | X-linked Kx blood group (McLeod syndrome)                                                                   | 2,09 |
| 51251  | NT5C3       | 5'-nucleotidase, cytosolic III                                                                              | 2,09 |
| 8766   | RAB11A      | RAB11A, member RAS oncogene family                                                                          | 2,08 |
| 441081 | ILMN_36410  | PREDICTED: Homo sapiens similar to nuclear pore membrane protein 121 (LOC441081), mRNA.                     | 2,08 |
| 5552   | SRGN        | serglycin                                                                                                   | 2,07 |
| 4833   | NME4        | non-metastatic cells 4, protein expressed in                                                                | 2,07 |
| 6374   | CXCL5       | chemokine (C-X-C motif) ligand 5                                                                            | 2,07 |
| 6622   | SNCA        | synuclein, alpha (non A4 component of amyloid precursor)                                                    | 2,06 |
| 83700  | JAM3        | junctional adhesion molecule 3                                                                              | 2,06 |
| 3611   | ILK         | integrin-linked kinase                                                                                      | 2,06 |
| 2280   | FKBP1A      | FK506 binding protein 1A, 12kDa                                                                             | 2,06 |
| 2040   | STOM        | stomatin                                                                                                    | 2,05 |

|                   |                                                                                                                                                    |      |
|-------------------|----------------------------------------------------------------------------------------------------------------------------------------------------|------|
| 4627 MYH9         | myosin, heavy chain 9, non-muscle                                                                                                                  | 2,05 |
| 651361 ILMN_35263 | PREDICTED: Homo sapiens similar to S-phase kinase-associated protein 1A (Cyclin A/CDK2-associated protein p19) (p19A) (p19skp1) (LOC651361), mRNA. | 2,04 |
| 9445 ITM2B        | integral membrane protein 2B                                                                                                                       | 2,04 |
| 83658 DYNLRB1     | dynein, light chain, roadblock-type 1                                                                                                              | 2,04 |
| 4052 LTBP1        | latent transforming growth factor beta binding protein 1                                                                                           | 2,03 |
| 1026 ILMN_5895    | Homo sapiens cyclin-dependent kinase inhibitor 1A (p21, Cip1) (CDKN1A), transcript variant 1, mRNA.                                                | 2,03 |
| 6638 ILMN_17485   | Homo sapiens small nuclear ribonucleoprotein polypeptide N (SNRPN), transcript variant 3, mRNA.                                                    | 2,02 |
| 83658 DYNLRB1     | dynein, light chain, roadblock-type 1                                                                                                              | 2,02 |
| 10929 SRSF8       | serine/arginine-rich splicing factor 8                                                                                                             | 2    |
| 27020 NPTN        | neuroplastin                                                                                                                                       | 2    |
| 4149 MAX          | MYC associated factor X                                                                                                                            | 2    |
| ILMN_110914       | BX429982 Homo sapiens FETAL LIVER Homo sapiens cDNA clone CS0DM002YI05 5-PRIME, mRNA sequence                                                      | 1,99 |
| 257019 FRMD3      | FERM domain containing 3                                                                                                                           | 1,99 |
| 23299 BICD2       | bicaudal D homolog 2 (Drosophila)                                                                                                                  | 1,99 |
| 84519 ACRBP       | acrosin binding protein                                                                                                                            | 1,99 |
| 84859 LRCH3       | leucine-rich repeats and calponin homology (CH) domain containing 3                                                                                | 1,97 |
| 641649 TMEM91     | transmembrane protein 91                                                                                                                           | 1,96 |
| 8428 STK24        | serine/threonine kinase 24                                                                                                                         | 1,96 |
| 6648 ILMN_19880   | Homo sapiens superoxide dismutase 2, mitochondrial (SOD2), nuclear gene encoding mitochondrial protein, transcript variant 1, mRNA.                | 1,96 |
| 3048 HBG2         | hemoglobin, gamma G                                                                                                                                | 1,95 |
| 5782 PTPN12       | protein tyrosine phosphatase, non-receptor type 12                                                                                                 | 1,94 |
| 5606 MAP2K3       | mitogen-activated protein kinase kinase 3                                                                                                          | 1,94 |
| 2534 FYN          | FYN oncogene related to SRC, FGR, YES                                                                                                              | 1,94 |
| 6638 ILMN_11685   | Homo sapiens small nuclear ribonucleoprotein polypeptide N (SNRPN), transcript variant 3, mRNA.                                                    | 1,93 |
| 5087 PBX1         | pre-B-cell leukemia homeobox 1                                                                                                                     | 1,93 |
| 9054 NFS1         | NFS1 nitrogen fixation 1 homolog (S. cerevisiae)                                                                                                   | 1,93 |
| 55796 MBNL3       | muscleblind-like 3 (Drosophila)                                                                                                                    | 1,93 |
| 645128 ILMN_40515 | PREDICTED: Homo sapiens similar to DEAD/H (Asp-Glu-Ala-Asp/His) box polypeptide 11 isoform 1 (LOC645128), mRNA.                                    | 1,93 |
| 1175 AP2S1        | adaptor-related protein complex 2, sigma 1 subunit                                                                                                 | 1,93 |
| 6678 ILMN_1780    | Homo sapiens secreted protein, acidic, cysteine-rich (osteonectin) (SPARC), mRNA.                                                                  | 1,92 |

|        |            |                                                                                                                              |      |
|--------|------------|------------------------------------------------------------------------------------------------------------------------------|------|
| 5725   | PTBP1      | polypyrimidine tract binding protein 1                                                                                       | 1,92 |
| 5577   | PRKAR2B    | protein kinase, cAMP-dependent, regulatory, type II, beta                                                                    | 1,92 |
| 79752  | ILMN_23674 | Homo sapiens zinc finger, AN1-type domain 1 (ZFAND1), mRNA.                                                                  | 1,91 |
| 5874   | RAB27B     | RAB27B, member RAS oncogene family                                                                                           | 1,91 |
| 3081   | HGD        | homogentisate 1,2-dioxygenase                                                                                                | 1,91 |
| 80212  | CCDC92     | coiled-coil domain containing 92                                                                                             | 1,91 |
| 54498  | SMOX       | spermine oxidase                                                                                                             | 1,9  |
| 4735   | 2.IX       | septin 2                                                                                                                     | 1,9  |
| 9124   | PDLIM1     | PDZ and LIM domain 1                                                                                                         | 1,9  |
| 9445   | ITM2B      | integral membrane protein 2B                                                                                                 | 1,9  |
|        | ILMN_89656 | yz74c09.s1 Soares_multiple_sclerosis_2NbHMSP Homo sapiens cDNA clone IMAGE:288784 3, mRNA sequence                           | 1,9  |
| 10357  | HMGB1P1    | high mobility group box 1 pseudogene 1                                                                                       | 1,9  |
| 83541  | FAM110A    | family with sequence similarity 110, member A                                                                                | 1,9  |
| 9191   | DEDD       | death effector domain containing                                                                                             | 1,9  |
| 649214 | ILMN_33279 | PREDICTED: Homo sapiens similar to High mobility group protein 1-like 10 (HMG-1L10), transcript variant 4 (LOC649214), mRNA. | 1,89 |
| 128989 | C22orf25   | chromosome 22 open reading frame 25                                                                                          | 1,89 |
| 153768 | PRELID2    | PRELI domain containing 2                                                                                                    | 1,88 |
| 11315  | PARK7      | parkinson protein 7                                                                                                          | 1,88 |
| 153527 | ZMAT2      | zinc finger, matrin-type 2                                                                                                   | 1,87 |
| 5197   | PF4V1      | platelet factor 4 variant 1                                                                                                  | 1,87 |
| 5196   | ILMN_16715 | Homo sapiens platelet factor 4 (chemokine (C-X-C motif) ligand 4) (PF4), mRNA.                                               | 1,87 |
| 10092  | ARPC5      | actin related protein 2/3 complex, subunit 5, 16kDa                                                                          | 1,87 |
| 22821  | RASA3      | RAS p21 protein activator 3                                                                                                  | 1,86 |
| 51251  | NT5C3      | 5'-nucleotidase, cytosolic III                                                                                               | 1,86 |
| 56890  | MDM1       | Mdm1 nuclear protein homolog (mouse)                                                                                         | 1,86 |
| 92092  | ZC3HAV1L   | zinc finger CCCH-type, antiviral 1-like                                                                                      | 1,85 |
| 22920  | KIFAP3     | kinesin-associated protein 3                                                                                                 | 1,85 |
| 1729   | DIAPH1     | diaphanous homolog 1 (Drosophila)                                                                                            | 1,85 |
| 22885  | ABLIM3     | actin binding LIM protein family, member 3                                                                                   | 1,85 |
| 8926   | ILMN_15998 | Homo sapiens SNRPN upstream reading frame (SNURF), transcript variant 1, mRNA.                                               | 1,83 |
| 4638   | MYLK       | myosin light chain kinase                                                                                                    | 1,83 |
| 644799 | ILMN_43702 | PREDICTED: Homo sapiens hypothetical protein LOC644799, transcript variant 1 (LOC644799), mRNA.                              | 1,83 |

|                   |                                                                                                                                                                          |      |
|-------------------|--------------------------------------------------------------------------------------------------------------------------------------------------------------------------|------|
| 643138 ILMN_39430 | PREDICTED: Homo sapiens similar to Guanine nucleotide-binding protein G(s), alpha subunit (Adenylate cyclase-stimulating G alpha protein) (G-alpha-8) (LOC643138), mRNA. | 1,83 |
| 3988 LIPA         | lipase A, lysosomal acid, cholesterol esterase                                                                                                                           | 1,83 |
| 8328 GF1B         | growth factor independent 1B transcription repressor                                                                                                                     | 1,83 |
| 6352 CCL5         | chemokine (C-C motif) ligand 5                                                                                                                                           | 1,83 |
| 56897 WRNIP1      | Werner helicase interacting protein 1                                                                                                                                    | 1,82 |
| 10477 UBE2E3      | ubiquitin-conjugating enzyme E2E 3                                                                                                                                       | 1,82 |
| 94121 SYTL4       | synaptotagmin-like 4                                                                                                                                                     | 1,82 |
| 5305 PIP4K2A      | phosphatidylinositol-5-phosphate 4-kinase, type II, alpha                                                                                                                | 1,82 |
| 3987 ILMN_139143  | PREDICTED: Homo sapiens LIM and senescent cell antigen-like domains 1 (LIMS1), mRNA.                                                                                     | 1,82 |
| 2811 GP1BA        | glycoprotein Ib (platelet), alpha polypeptide                                                                                                                            | 1,82 |
| 91624 NEXN        | nexilin (F actin binding protein)                                                                                                                                        | 1,81 |
| 6500 SKP1         | S-phase kinase-associated protein 1                                                                                                                                      | 1,8  |
| 10981 RAB32       | RAB32, member RAS oncogene family                                                                                                                                        | 1,8  |
| 114769 CARD16     | caspase recruitment domain family, member 16                                                                                                                             | 1,79 |
| 55122 AKIRIN2     | akirin 2                                                                                                                                                                 | 1,79 |
| 339005 WHAMMP3    | WAS protein homolog associated with actin, golgi membranes and microtubules pseudogene 3                                                                                 | 1,78 |
| ILMN_93150        | UI-H-EU0-azk-k-10-0-UI.s1 NCI_CGAP_Car1 Homo sapiens cDNA clone IMAGE: 5849985 3, mRNA sequence                                                                          | 1,78 |
| 80790 ILMN_13851  | Homo sapiens c-Maf-inducing protein (CMIP), transcript variant Tc-mip, mRNA.                                                                                             | 1,78 |
| 9839 ZEB2         | zinc finger E-box binding homeobox 2                                                                                                                                     | 1,77 |
| 27257 LSM1        | LSM1 homolog, U6 small nuclear RNA associated (S. cerevisiae)                                                                                                            | 1,77 |
| 3688 ITGB1        | integrin, beta 1 (fibronectin receptor, beta polypeptide, antigen CD29 includes MDF2, MSK12)                                                                             | 1,77 |
| 56344 CABP5       | calcium binding protein 5                                                                                                                                                | 1,77 |
| 351 APP           | amyloid beta (A4) precursor protein                                                                                                                                      | 1,77 |
| 4154 MBNL1        | muscleblind-like (Drosophila)                                                                                                                                            | 1,76 |
| ILMN_88177        | Homo sapiens cDNA clone IMAGE:5261213                                                                                                                                    | 1,76 |
| 488 ILMN_19965    | Homo sapiens ATPase, Ca++ transporting, cardiac muscle, slow twitch 2 (ATP2A2), transcript variant 1, mRNA.                                                              | 1,76 |
| 7485 WRB          | tryptophan rich basic protein                                                                                                                                            | 1,75 |
| 9978 RBX1         | ring-box 1, E3 ubiquitin protein ligase                                                                                                                                  | 1,75 |
| 94274 PPP1R14A    | protein phosphatase 1, regulatory (inhibitor) subunit 14A                                                                                                                | 1,75 |
| ILMN_115478       | UI-E-EO0-ahy-o-21-0-UI.s1 UI-E-EO0 Homo sapiens cDNA clone UI-E-EO0-ahy-o-21-0-UI 3, mRNA sequence                                                                       | 1,75 |
| 9588 PRDX6        | peroxiredoxin 6                                                                                                                                                          | 1,74 |
| 10398 MYL9        | myosin, light chain 9, regulatory                                                                                                                                        | 1,74 |

|                    |                                                                                       |      |
|--------------------|---------------------------------------------------------------------------------------|------|
| 6009 RHEB          | Ras homolog enriched in brain                                                         | 1,73 |
| 6774 STAT3         | signal transducer and activator of transcription 3 (acute-phase response factor)      | 1,72 |
| 6117 RPA1          | replication protein A1, 70kDa                                                         | 1,72 |
| 651723 ILMN_39567  | PREDICTED: Homo sapiens similar to schlafen family member 13 (LOC651723), mRNA.       | 1,72 |
| 387882 ILMN_23241  | Homo sapiens hypothetical protein (LOC387882), mRNA.                                  | 1,72 |
| 57110 HRASLS       | HRAS-like suppressor                                                                  | 1,72 |
| 25932 CLIC4        | chloride intracellular channel 4                                                      | 1,72 |
| 808 CALM3          | calmodulin 3 (phosphorylase kinase, delta)                                            | 1,72 |
| 80739 C6orf25      | chromosome 6 open reading frame 25                                                    | 1,72 |
| 30061 SLC40A1      | solute carrier family 40 (iron-regulated transporter), member 1                       | 1,71 |
| 5911 RAP2A         | RAP2A, member of RAS oncogene family                                                  | 1,71 |
| 2280 FKBP1A        | FK506 binding protein 1A, 12kDa                                                       | 1,71 |
| 682 BSG            | basigin (Ok blood group)                                                              | 1,71 |
| 4627 MYH9          | myosin, heavy chain 9, non-muscle                                                     | 1,69 |
| 643752 RAP1BL      | RAP1B, member of RAS oncogene family pseudogene                                       | 1,69 |
| 54498 SMOX         | spermine oxidase                                                                      | 1,68 |
| 6117 RPA1          | replication protein A1, 70kDa                                                         | 1,68 |
| 5782 PTPN12        | protein tyrosine phosphatase, non-receptor type 12                                    | 1,68 |
| 5341 PLEK          | pleckstrin                                                                            | 1,68 |
| 27040 LAT          | linker for activation of T cells                                                      | 1,68 |
| ILMN_125202        | IL2-NT0102-160600-105-C03 NT0102 Homo sapiens cDNA, mRNA sequence                     | 1,68 |
| ILMN_123473        | wf43g03.x1 Soares_NFL_T_GBC_S1 Homo sapiens cDNA clone IMAGE:2358388 3, mRNA sequence | 1,68 |
| ILMN_121109        | Homo sapiens mRNA; cDNA DKFZp762M127 (from clone DKFZp762M127)                        | 1,68 |
| 267 AMFR           | autocrine motility factor receptor                                                    | 1,68 |
| 51646 YPEL5        | yippee-like 5 (Drosophila)                                                            | 1,67 |
| 64805 P2RY12       | purinergic receptor P2Y, G-protein coupled, 12                                        | 1,67 |
| 136319 MTPN        | myotrophin                                                                            | 1,67 |
| 10049 DNAJB6       | DnaJ (Hsp40) homolog, subfamily B, member 6                                           | 1,67 |
| 51185 CRBN         | cereblon                                                                              | 1,67 |
| 598 BCL2L1         | BCL2-like 1                                                                           | 1,67 |
| 8654 PDE5A         | phosphodiesterase 5A, cGMP-specific                                                   | 1,66 |
| 23603 CORO1C       | coronin, actin binding protein, 1C                                                    | 1,66 |
| 375033 ILMN_170351 | Homo sapiens platelet endothelial aggregation receptor 1 (PEAR1), mRNA.               | 1,65 |

|        |               |                                                                                                                              |      |
|--------|---------------|------------------------------------------------------------------------------------------------------------------------------|------|
| 391475 | DYTN          | dystrotelin                                                                                                                  | 1,65 |
| 28996  | HIPK2         | homeodomain interacting protein kinase 2                                                                                     | 1,65 |
| 2500   | ILMN_16099    | Homo sapiens ferritin, heavy polypeptide-like 7 (FTHL7) on chromosome 13.                                                    | 1,65 |
| 10000  | AKT3          | v-akt murine thymoma viral oncogene homolog 3 (protein kinase B, gamma)                                                      | 1,65 |
| 5606   | MAP2K3        | mitogen-activated protein kinase kinase 3                                                                                    | 1,64 |
| 644162 | ILMN_43225    | PREDICTED: Homo sapiens similar to septin 7, transcript variant 4 (LOC644162), mRNA.                                         | 1,64 |
| 1523   | CUX1          | cut-like homeobox 1                                                                                                          | 1,64 |
| 6668   | SP2           | Sp2 transcription factor                                                                                                     | 1,63 |
| 4735   | 2.IX septin 2 |                                                                                                                              | 1,63 |
| 9554   | SEC22B        | SEC22 vesicle trafficking protein homolog B (S. cerevisiae) (gene/pseudogene)                                                | 1,63 |
| 8436   | SDPR          | serum deprivation response                                                                                                   | 1,63 |
| 11235  | PDCD10        | programmed cell death 10                                                                                                     | 1,63 |
| 4154   | MBNL1         | muscleblind-like (Drosophila)                                                                                                | 1,63 |
| 440917 | LOC440917     | tyrosine 3-monooxygenase/tryptophan 5-monooxygenase activation protein, epsilon polypeptide pseudogene                       | 1,63 |
| 6399   | TRAPPC2       | trafficking protein particle complex 2                                                                                       | 1,62 |
| 6478   | SIAH2         | seven in absentia homolog 2 (Drosophila)                                                                                     | 1,62 |
| 27040  | ILMN_30259    | Homo sapiens linker for activation of T cells (LAT), transcript variant 2, mRNA.                                             | 1,62 |
| 9446   | GSTO1         | glutathione S-transferase omega 1                                                                                            | 1,62 |
| 2717   | GLA           | galactosidase, alpha                                                                                                         | 1,62 |
| 55281  | TMEM140       | transmembrane protein 140                                                                                                    | 1,61 |
| 64114  | TMBIM1        | transmembrane BAX inhibitor motif containing 1                                                                               | 1,61 |
| 26994  | RNF11         | ring finger protein 11                                                                                                       | 1,61 |
| 2026   | ENO2          | enolase 2 (gamma, neuronal)                                                                                                  | 1,61 |
| 56911  | C21orf7       | chromosome 21 open reading frame 7                                                                                           | 1,61 |
| 10357  | HMGB1P1       | high mobility group box 1 pseudogene 1                                                                                       | 1,6  |
| 25852  | ARMC8         | armadillo repeat containing 8                                                                                                | 1,6  |
| 51720  | UIMC1         | ubiquitin interaction motif containing 1                                                                                     | 1,59 |
| 644380 | ILMN_36938    | PREDICTED: Homo sapiens similar to High mobility group protein 1-like 10 (HMG-1L10), transcript variant 1 (LOC644380), mRNA. | 1,59 |
| 387820 | ILMN_26714    | PREDICTED: Homo sapiens similar to DnaJ (Hsp40) homolog, subfamily B, member 6 isoform a (LOC387820), mRNA.                  | 1,59 |
|        | ILMN_100075   | Homo sapiens cDNA FLJ37325 fis, clone BRAMY2018295                                                                           | 1,59 |
| 7871   | SLMAP         | sarcolemma associated protein                                                                                                | 1,58 |
| 147199 | SCGB1C1       | secretoglobin, family 1C, member 1                                                                                           | 1,57 |

|        |             |                                                                                                                                 |      |
|--------|-------------|---------------------------------------------------------------------------------------------------------------------------------|------|
| 11031  | RAB31       | RAB31, member RAS oncogene family                                                                                               | 1,57 |
| 10857  | PGRMC1      | progesterone receptor membrane component 1                                                                                      | 1,57 |
| 58485  | TRAPPC1     | trafficking protein particle complex 1                                                                                          | 1,56 |
| 9861   | PSMD6       | proteasome (prosome, macropain) 26S subunit, non-ATPase, 6                                                                      | 1,56 |
| 8337   | ILMN_26733  | Homo sapiens histone cluster 2, H2aa3 (HIST2H2AA3), mRNA.                                                                       | 1,56 |
| 7076   | TIMP1       | TIMP metalloproteinase inhibitor 1                                                                                              | 1,55 |
| 27018  | NGFRAP1     | nerve growth factor receptor (TNFRSF16) associated protein 1                                                                    | 1,55 |
| 2309   | FOXO3       | forkhead box O3                                                                                                                 | 1,55 |
| 51566  | ARMCX3      | armadillo repeat containing, X-linked 3                                                                                         | 1,55 |
| 25893  | TRIM58      | tripartite motif containing 58                                                                                                  | 1,54 |
| 4860   | PNP         | purine nucleoside phosphorylase                                                                                                 | 1,54 |
| 27030  | MLH3        | mutL homolog 3 (E. coli)                                                                                                        | 1,54 |
| 3315   | HSPB1       | heat shock 27kDa protein 1                                                                                                      | 1,54 |
| 1727   | CYB5R3      | cytochrome b5 reductase 3                                                                                                       | 1,54 |
| 395    | ARHGAP6     | Rho GTPase activating protein 6                                                                                                 | 1,54 |
| 226    | ALDOA       | aldolase A, fructose-bisphosphate                                                                                               | 1,54 |
| 10169  | SERF2       | small EDRK-rich factor 2                                                                                                        | 1,53 |
| 219771 | CCNY        | cyclin Y                                                                                                                        | 1,53 |
| 83707  | ILMN_9909   | Homo sapiens tRNA phosphotransferase 1 (TRPT1), transcript variant 2, mRNA.                                                     | 1,52 |
| 8773   | SNAP23      | synaptosomal-associated protein, 23kDa                                                                                          | 1,52 |
| 4735   | 2.IX        | septin 2                                                                                                                        | 1,52 |
| 6403   | SELP        | selectin P (granule membrane protein 140kDa, antigen CD62)                                                                      | 1,52 |
| 441155 | ILMN_35976  | PREDICTED: Homo sapiens similar to Zinc finger CCCH-type domain-containing protein 11A, transcript variant 5 (LOC441155), mRNA. | 1,52 |
| 51094  | ADIPOR1     | adiponectin receptor 1                                                                                                          | 1,52 |
| 6789   | STK4        | serine/threonine kinase 4                                                                                                       | 1,51 |
| 9628   | RGS6        | regulator of G-protein signaling 6                                                                                              | 1,51 |
| 123803 | NTAN1       | N-terminal asparagine amidase                                                                                                   | 1,51 |
| 112597 | ILMN_137135 | Homo sapiens hypothetical protein MGC4677 (MGC4677), mRNA.                                                                      | 1,51 |
| 127018 | LYPLAL1     | lysophospholipase-like 1                                                                                                        | 1,51 |
| 29094  | LGALS1      | lectin, galactoside-binding-like                                                                                                | 1,51 |
| 56940  | ILMN_138115 | PREDICTED: Homo sapiens dual specificity phosphatase 22 (DUSP22), mRNA.                                                         | 1,51 |
| 6001   | RGS10       | regulator of G-protein signaling 10                                                                                             | 1,5  |

|        |             |                                                                                               |      |
|--------|-------------|-----------------------------------------------------------------------------------------------|------|
| 5315   | PKM2        | pyruvate kinase, muscle                                                                       | 1,5  |
|        | ILMN_81934  | UI-H-DF1-auk-p-10-0-UI.s1 NCI_CGAP_DF1 Homo sapiens cDNA clone IMAGE:5870841 3, mRNA sequence | 1,5  |
| 326624 | RAB37       | RAB37, member RAS oncogene family                                                             | 1,49 |
| 8031   | NCOA4       | nuclear receptor coactivator 4                                                                | 1,49 |
| 55256  | ADI1        | acireductone dioxygenase 1                                                                    | 1,49 |
| 23032  | USP33       | ubiquitin specific peptidase 33                                                               | 1,48 |
| 5870   | RAB6A       | RAB6A, member RAS oncogene family                                                             | 1,48 |
|        | ILMN_103084 | BX105743 NCI_CGAP_GC6 Homo sapiens cDNA clone IMAGp998H135716, mRNA sequence                  | 1,48 |
|        | ILMN_97811  | AV762101 MDS Homo sapiens cDNA clone MDSEOA03 5, mRNA sequence                                | 1,48 |
| 8348   | HIST1H2BO   | histone cluster 1, H2bo                                                                       | 1,48 |
| 25852  | ARMC8       | armadillo repeat containing 8                                                                 | 1,48 |
| 57584  | ARHGAP21    | Rho GTPase activating protein 21                                                              | 1,48 |
| 51538  | ZCCHC17     | zinc finger, CCHC domain containing 17                                                        | 1,47 |
| 340348 | TSPAN33     | tetraspanin 33                                                                                | 1,47 |
| 4149   | MAX         | MYC associated factor X                                                                       | 1,47 |
| 26119  | LDLRAP1     | low density lipoprotein receptor adaptor protein 1                                            | 1,47 |
| 9923   | ZBTB40      | zinc finger and BTB domain containing 40                                                      | 1,46 |
| 53346  | TM6SF1      | transmembrane 6 superfamily member 1                                                          | 1,46 |
| 8773   | SNAP23      | synaptosomal-associated protein, 23kDa                                                        | 1,46 |
| 4588   | MUC6        | mucin 6, oligomeric mucus/gel-forming                                                         | 1,46 |
|        | ILMN_106785 | fg13g01.x1 Human Iris cDNA (Normalized): fg Homo sapiens cDNA clone fg13g01 3, mRNA sequence  | 1,46 |
| 51727  | CMPK1       | cytidine monophosphate (UMP-CMP) kinase 1, cytosolic                                          | 1,46 |
| 5552   | SRGN        | serglycin                                                                                     | 1,45 |
| 5062   | PAK2        | p21 protein (Cdc42/Rac)-activated kinase 2                                                    | 1,45 |
| 653635 | ILMN_42161  | PREDICTED: Homo sapiens similar to CXYorf1-related protein (LOC653635), mRNA.                 | 1,45 |
| 89857  | KLHL6       | kelch-like 6 (Drosophila)                                                                     | 1,45 |
| 3017   | HIST1H2BD   | histone cluster 1, H2bd                                                                       | 1,45 |
| 2778   | GNAS        | GNAS complex locus                                                                            | 1,45 |
| 57818  | G6PC2       | glucose-6-phosphatase, catalytic, 2                                                           | 1,45 |
| 8654   | PDE5A       | phosphodiesterase 5A, cGMP-specific                                                           | 1,44 |
| 3047   | HBG1        | hemoglobin, gamma A                                                                           | 1,44 |
| 10152  | ABI2        | abl-interactor 2                                                                              | 1,44 |
| 137492 | VPS37A      | vacuolar protein sorting 37 homolog A (S. cerevisiae)                                         | 1,43 |



|                   |                                                                                          |      |
|-------------------|------------------------------------------------------------------------------------------|------|
| 30061 SLC40A1     | solute carrier family 40 (iron-regulated transporter), member 1                          | 1,43 |
| 4354 MPP1         | membrane protein, palmitoylated 1, 55kDa                                                 | 1,43 |
| 650263 ILMN_46692 | PREDICTED: Homo sapiens hypothetical protein LOC650263 (LOC650263), mRNA.                | 1,43 |
| 11345 GABARAPL2   | GABA(A) receptor-associated protein-like 2                                               | 1,43 |
| 2207 FCER1G       | Fc fragment of IgE, high affinity I, receptor for; gamma polypeptide                     | 1,43 |
| 760 CA2           | carbonic anhydrase II                                                                    | 1,43 |
| 7353 UFD1L        | ubiquitin fusion degradation 1 like (yeast)                                              | 1,42 |
| 4917 NTN3         | netrin 3                                                                                 | 1,42 |
| 10093 ARPC4       | actin related protein 2/3 complex, subunit 4, 20kDa                                      | 1,42 |
| 10000 AKT3        | v-akt murine thymoma viral oncogene homolog 3 (protein kinase B, gamma)                  | 1,42 |
| 7292 TNFSF4       | tumor necrosis factor (ligand) superfamily, member 4                                     | 1,41 |
| 9764 KIAA0513     | KIAA0513                                                                                 | 1,41 |
| 2820 GPD2         | glycerol-3-phosphate dehydrogenase 2 (mitochondrial)                                     | 1,41 |
| 2010 EMD          | emerin                                                                                   | 1,41 |
| 10209 EIF1        | eukaryotic translation initiation factor 1                                               | 1,41 |
| 22830 ILMN_32336  | PREDICTED: Homo sapiens zinc finger protein 409 (ZNF409), mRNA.                          | 1,4  |
| 9087 TMSB4Y       | thymosin beta 4, Y-linked                                                                | 1,4  |
| 6613 SUMO2        | SMT3 suppressor of mif two 3 homolog 2 (S. cerevisiae)                                   | 1,4  |
| 29937 NENF        | neudesin neurotrophic factor                                                             | 1,4  |
| 8477 GPR65        | G protein-coupled receptor 65                                                            | 1,4  |
| 79053 ALG8        | asparagine-linked glycosylation 8, alpha-1,3-glucosyltransferase homolog (S. cerevisiae) | 1,4  |
| 85439 STON2       | stonin 2                                                                                 | 1,39 |
| 23011 RAB21       | RAB21, member RAS oncogene family                                                        | 1,39 |
| 2766 GMPR         | guanosine monophosphate reductase                                                        | 1,39 |
| 2495 FTH1         | ferritin, heavy polypeptide 1                                                            | 1,39 |
| 647499 ILMN_34248 | PREDICTED: Homo sapiens similar to CG7889-PA, transcript variant 2 (LOC647499), mRNA.    | 1,38 |
| 81689 ISCA1       | iron-sulfur cluster assembly 1 homolog (S. cerevisiae)                                   | 1,38 |
| 2776 GNAQ         | guanine nucleotide binding protein (G protein), q polypeptide                            | 1,38 |
| 54780 NSMCE4A     | non-SMC element 4 homolog A (S. cerevisiae)                                              | 1,37 |
| 26065 LSM14A      | LSM14A, SCD6 homolog A (S. cerevisiae)                                                   | 1,37 |
| ILMN_73823        | Homo sapiens cDNA: FLJ23006 fis, clone LNG00414                                          | 1,37 |
| 84548 TMEM185A    | transmembrane protein 185A                                                               | 1,36 |
| 51643 TMBIM4      | transmembrane BAX inhibitor motif containing 4                                           | 1,36 |

|                   |                                                                                                                                                                          |      |
|-------------------|--------------------------------------------------------------------------------------------------------------------------------------------------------------------------|------|
| 57142 RTN4        | reticulon 4                                                                                                                                                              | 1,36 |
| 25915 NDUFAF3     | NADH dehydrogenase (ubiquinone) 1 alpha subcomplex, assembly factor 3                                                                                                    | 1,36 |
| 648057 ILMN_32589 | PREDICTED: Homo sapiens similar to Guanine nucleotide-binding protein G(s), alpha subunit (Adenylate cyclase-stimulating G alpha protein) (G-alpha-8) (LOC648057), mRNA. | 1,36 |
| ILMN_71879        | Homo sapiens cDNA clone IMAGE:5297467                                                                                                                                    | 1,36 |
| 10049 DNAJB6      | DnaJ (Hsp40) homolog, subfamily B, member 6                                                                                                                              | 1,36 |
| 9556 C14orf2      | chromosome 14 open reading frame 2                                                                                                                                       | 1,36 |
| 7511 XPNPEP1      | X-prolyl aminopeptidase (aminopeptidase P) 1, soluble                                                                                                                    | 1,35 |
| 7351 UCP2         | uncoupling protein 2 (mitochondrial, proton carrier)                                                                                                                     | 1,35 |
| 6397 SEC14L1      | SEC14-like 1 ( <i>S. cerevisiae</i> )                                                                                                                                    | 1,35 |
| 9861 PSMD6        | proteasome (prosome, macropain) 26S subunit, non-ATPase, 6                                                                                                               | 1,35 |
| 55329 MNS1        | meiosis-specific nuclear structural 1                                                                                                                                    | 1,35 |
| 23215 PRRC2C      | proline-rich coiled-coil 2C                                                                                                                                              | 1,35 |
| 6431 SRSF6        | serine/arginine-rich splicing factor 6                                                                                                                                   | 1,34 |
| 54470 ARM CX6     | armadillo repeat containing, X-linked 6                                                                                                                                  | 1,34 |
| 55062 WIP1        | WD repeat domain, phosphoinositide interacting 1                                                                                                                         | 1,33 |
| 124446 TMEM219    | transmembrane protein 219                                                                                                                                                | 1,33 |
| 5573 PRKAR1A      | protein kinase, cAMP-dependent, regulatory, type I, alpha (tissue specific extinguisher 1)                                                                               | 1,33 |
| 3572 IL6ST        | interleukin 6 signal transducer (gp130, oncostatin M receptor)                                                                                                           | 1,33 |
| 10949 HNRNPA0     | heterogeneous nuclear ribonucleoprotein A0                                                                                                                               | 1,33 |
| 10681 GNB5        | guanine nucleotide binding protein (G protein), beta 5                                                                                                                   | 1,33 |
| 1399 CRKL         | v-crK sarcoma virus CT10 oncogene homolog (avian)-like                                                                                                                   | 1,33 |
| 7009 TMBIM6       | transmembrane BAX inhibitor motif containing 6                                                                                                                           | 1,32 |
| 6451 SH3BGR1      | SH3 domain binding glutamic acid-rich protein like                                                                                                                       | 1,32 |
| 3013 HIST1H2AD    | histone cluster 1, H2ad                                                                                                                                                  | 1,32 |
| 84310 C7orf50     | chromosome 7 open reading frame 50                                                                                                                                       | 1,32 |
| 55004 LAMTOR1     | late endosomal/lysosomal adaptor, MAPK and MTOR activator 1                                                                                                              | 1,32 |
| 51742 ARID4B      | AT rich interactive domain 4B (RBP1-like)                                                                                                                                | 1,32 |
| 80232 WDR26       | WD repeat domain 26                                                                                                                                                      | 1,31 |
| 4130 MAP1A        | microtubule-associated protein 1A                                                                                                                                        | 1,31 |
| 389787 LOC389787  | tumor protein, translationally-controlled 1 pseudogene                                                                                                                   | 1,31 |
| 51206 GP6         | glycoprotein VI (platelet)                                                                                                                                               | 1,31 |
| 5908 RAP1B        | RAP1B, member of RAS oncogene family                                                                                                                                     | 1,3  |

|        |             |                                                                                                                            |      |
|--------|-------------|----------------------------------------------------------------------------------------------------------------------------|------|
| 4673   | NAP1L1      | nucleosome assembly protein 1-like 1                                                                                       | 1,3  |
| 80177  | MYCT1       | myc target 1                                                                                                               | 1,3  |
| 3241   | HPCAL1      | hippocalcin-like 1                                                                                                         | 1,3  |
| 9086   | EIF1AY      | eukaryotic translation initiation factor 1A, Y-linked                                                                      | 1,3  |
| 7750   | ZMYM2       | zinc finger, MYM-type 2                                                                                                    | 1,29 |
| 80230  | RUFY1       | RUN and FYVE domain containing 1                                                                                           | 1,29 |
| 84281  | C2orf88     | chromosome 2 open reading frame 88                                                                                         | 1,29 |
| 2815   | GP9         | glycoprotein IX (platelet)                                                                                                 | 1,29 |
| 10938  | EHD1        | EH-domain containing 1                                                                                                     | 1,29 |
| 339005 | ILMN_32270  | Homo sapiens WAS protein homolog associated with actin, golgi membranes and microtubules-like 1 (WHAMML1), non-coding RNA. | 1,28 |
| 283131 | ILMN_138191 | PREDICTED: Homo sapiens trophoblast-derived noncoding RNA (TncRNA), misc RNA.                                              | 1,28 |
| 647025 | ILMN_32345  | PREDICTED: Homo sapiens hypothetical LOC647025 (LOC647025), mRNA.                                                          | 1,28 |
| 53827  | FXYS5       | FXYS domain containing ion transport regulator 5                                                                           | 1,28 |
| 760    | CA2         | carbonic anhydrase II                                                                                                      | 1,28 |
| 148823 | ILMN_22220  | Homo sapiens chromosome 1 open reading frame 150 (C1orf150), mRNA.                                                         | 1,28 |
| 8905   | AP1S2       | adaptor-related protein complex 1, sigma 2 subunit                                                                         | 1,28 |
| 7326   | UBE2G1      | ubiquitin-conjugating enzyme E2G 1                                                                                         | 1,27 |
| 90853  | SPOCD1      | SPOC domain containing 1                                                                                                   | 1,27 |
| 2273   | FHL1        | four and a half LIM domains 1                                                                                              | 1,27 |
| 25793  | FBXO7       | F-box protein 7                                                                                                            | 1,27 |
| 8804   | CREG1       | cellular repressor of E1A-stimulated genes 1                                                                               | 1,27 |
| 377    | ARF3        | ADP-ribosylation factor 3                                                                                                  | 1,27 |
| 6748   | SSR4        | signal sequence receptor, delta                                                                                            | 1,26 |
| 387590 | ILMN_12454  | Homo sapiens TPTE pseudogene (psiTPTE22), non-coding RNA.                                                                  | 1,26 |
| 5352   | PLOD2       | procollagen-lysine, 2-oxoglutarate 5-dioxygenase 2                                                                         | 1,26 |
| 112597 | ILMN_18892  | Homo sapiens hypothetical protein MGC4677 (MGC4677), mRNA.                                                                 | 1,26 |
| 653226 | ILMN_39856  | PREDICTED: Homo sapiens similar to Signal recognition particle 9 kDa protein (SRP9) (LOC653226), mRNA.                     | 1,26 |
| 651919 | ILMN_36846  | PREDICTED: Homo sapiens similar to Ras-related C3 botulinum toxin substrate 1 (p21-Rac1) (LOC651919), mRNA.                | 1,26 |
| 122773 | KLHDC1      | kelch domain containing 1                                                                                                  | 1,26 |
| 25994  | HIGD1A      | HIG1 hypoxia inducible domain family, member 1A                                                                            | 1,26 |
| 1982   | EIF4G2      | eukaryotic translation initiation factor 4 gamma, 2                                                                        | 1,26 |
| 1653   | DDX1        | DEAD (Asp-Glu-Ala-Asp) box polypeptide 1                                                                                   | 1,26 |

|                   |                                                                                                 |      |
|-------------------|-------------------------------------------------------------------------------------------------|------|
| 8676 STX11        | syntaxin 11                                                                                     | 1,25 |
| 113230 ILMN_33629 | PREDICTED: Homo sapiens hypothetical protein LOC113230 (LOC113230), mRNA.                       | 1,25 |
| 1603 DAD1         | defender against cell death 1                                                                   | 1,25 |
| 113457 TUBA3D     | tubulin, alpha 3d                                                                               | 1,24 |
| 338596 ST8SIA6    | ST8 alpha-N-acetyl-neuraminide alpha-2,8-sialyltransferase 6                                    | 1,24 |
| 1032 CDKN2D       | cyclin-dependent kinase inhibitor 2D (p19, inhibits CDK4)                                       | 1,24 |
| 388403 YPEL2      | yippee-like 2 (Drosophila)                                                                      | 1,23 |
| 85012 TCEAL3      | transcription elongation factor A (SII)-like 3                                                  | 1,23 |
| 136319 MTPN       | myotrophin                                                                                      | 1,23 |
| 81631 MAP1LC3B    | microtubule-associated protein 1 light chain 3 beta                                             | 1,23 |
| 91283 C9orf30     | chromosome 9 open reading frame 30                                                              | 1,23 |
| 3105 HLA-A        | major histocompatibility complex, class I, A                                                    | 1,22 |
| 1072 CFL1         | cofilin 1 (non-muscle)                                                                          | 1,22 |
| 85012 TCEAL3      | transcription elongation factor A (SII)-like 3                                                  | 1,21 |
| 6622 SNCA         | synuclein, alpha (non A4 component of amyloid precursor)                                        | 1,21 |
| 83442 SH3BGR1     | SH3 domain binding glutamic acid-rich protein like 3                                            | 1,21 |
| 6451 SH3BGR1      | SH3 domain binding glutamic acid-rich protein like                                              | 1,21 |
| 51247 PAIP2       | poly(A) binding protein interacting protein 2                                                   | 1,21 |
| 399491 LOC399491  | GPS, PLAT and transmembrane domain-containing protein                                           | 1,21 |
| 55173 MRPS10      | mitochondrial ribosomal protein S10                                                             | 1,21 |
| 326624 RAB37      | RAB37, member RAS oncogene family                                                               | 1,2  |
| 64747 MFSD1       | major facilitator superfamily domain containing 1                                               | 1,2  |
| 649181 ILMN_41226 | PREDICTED: Homo sapiens hypothetical protein LOC649181 (LOC649181), mRNA.                       | 1,2  |
| 3423 IDS          | iduronate 2-sulfatase                                                                           | 1,2  |
| 3107 HLA-C        | major histocompatibility complex, class I, C                                                    | 1,2  |
| 2768 GNA12        | guanine nucleotide binding protein (G protein) alpha 12                                         | 1,2  |
| 6352 CCL5         | chemokine (C-C motif) ligand 5                                                                  | 1,2  |
| 79038 ZFYVE21     | zinc finger, FYVE domain containing 21                                                          | 1,19 |
| 122553 TRAPPC6B   | trafficking protein particle complex 6B                                                         | 1,19 |
| 754 PTTG1P        | pituitary tumor-transforming 1 interacting protein                                              | 1,19 |
| 4698 NDUFA5       | NADH dehydrogenase (ubiquinone) 1 alpha subcomplex, 5, 13kDa                                    | 1,19 |
| 653061 ILMN_40836 | PREDICTED: Homo sapiens similar to golgi autoantigen, golgin subfamily a, 8A (LOC653061), mRNA. | 1,19 |
| 390367 ILMN_36801 | PREDICTED: Homo sapiens hypothetical LOC390367 (LOC390367), mRNA.                               | 1,19 |

|                    |                                                                                                                                                                                                                                                                                             |      |
|--------------------|---------------------------------------------------------------------------------------------------------------------------------------------------------------------------------------------------------------------------------------------------------------------------------------------|------|
| 50848 F11R         | F11 receptor                                                                                                                                                                                                                                                                                | 1,19 |
| 27072 VPS41        | vacuolar protein sorting 41 homolog ( <i>S. cerevisiae</i> )                                                                                                                                                                                                                                | 1,18 |
| 989                | 7.IX septin 7                                                                                                                                                                                                                                                                               | 1,18 |
| 80148 PQLC1        | PQ loop repeat containing 1                                                                                                                                                                                                                                                                 | 1,18 |
| 5494 PPM1A         | protein phosphatase, Mg <sup>2+</sup> /Mn <sup>2+</sup> dependent, 1A                                                                                                                                                                                                                       | 1,18 |
| 51177 PLEKHO1      | pleckstrin homology domain containing, family O member 1                                                                                                                                                                                                                                    | 1,18 |
| 29074 MRPL18       | mitochondrial ribosomal protein L18                                                                                                                                                                                                                                                         | 1,18 |
| 727909 ILMN_41851  | PREDICTED: Homo sapiens similar to Golgin subfamily A member 8-like protein 2, transcript variant 4 (LOC727909), mRNA.                                                                                                                                                                      | 1,18 |
| 642489 ILMN_37913  | PREDICTED: Homo sapiens similar to FK506-binding protein 1A (LOC642489), mRNA.                                                                                                                                                                                                              | 1,18 |
| 286239 ILMN_39621  | PREDICTED: Homo sapiens similar to NAD-dependent malic enzyme, mitochondrial precursor (NAD-ME) (Malic enzyme 2) (LOC286239), mRNA.                                                                                                                                                         | 1,18 |
| 3738 KCNA3         | potassium voltage-gated channel, shaker-related subfamily, member 3                                                                                                                                                                                                                         | 1,18 |
| ILMN_76886         | Homo sapiens cDNA FLJ42306 fis, clone TRACH2001646                                                                                                                                                                                                                                          | 1,18 |
| 9402 GRAP2         | GRB2-related adaptor protein 2                                                                                                                                                                                                                                                              | 1,18 |
| 1647 GADD45A       | growth arrest and DNA-damage-inducible, alpha                                                                                                                                                                                                                                               | 1,18 |
| 801 CALM1          | calmodulin 1 (phosphorylase kinase, delta)                                                                                                                                                                                                                                                  | 1,18 |
| 79020 C7orf25      | chromosome 7 open reading frame 25                                                                                                                                                                                                                                                          | 1,18 |
| 55973 BCAP29       | B-cell receptor-associated protein 29                                                                                                                                                                                                                                                       | 1,18 |
| 6487 ST3GAL3       | ST3 beta-galactoside alpha-2,3-sialyltransferase 3                                                                                                                                                                                                                                          | 1,17 |
| 729317 LOC729317   | voltage-dependent anion channel 2 pseudogene                                                                                                                                                                                                                                                | 1,17 |
| 200942 ILMN_6513   | Homo sapiens kelch domain containing 8B (KLHDC8B), mRNA.                                                                                                                                                                                                                                    | 1,17 |
| 527 ATP6V0C        | ATPase, H <sup>+</sup> transporting, lysosomal 16kDa, V0 subunit c                                                                                                                                                                                                                          | 1,17 |
| 55529 TMEM55A      | transmembrane protein 55A                                                                                                                                                                                                                                                                   | 1,16 |
| 8926 SNURF         | SNRPN upstream reading frame                                                                                                                                                                                                                                                                | 1,16 |
| 643287 ILMN_37869  | PREDICTED: Homo sapiens similar to prothymosin alpha, transcript variant 1 (LOC643287), mRNA.                                                                                                                                                                                               | 1,16 |
| ILMN_116660        | UI-H-BI3-alr-f-05-0-UI.s1 NCI_CGAP_Sub5 Homo sapiens cDNA clone IMAGE:3068313 3, mRNA sequence                                                                                                                                                                                              | 1,16 |
| 649853 ILMN_168174 | Homo sapiens major histocompatibility complex class I HLA-A29.1 (HLA-A29.1), mRNA. XM_001132736<br>XM_001132742 XM_001132747 XM_001132750 XM_001132753 XM_001132757 XM_001132760 XM_001132769<br>XM_001132772 XM_001132776 XM_001132779 XM_001132781 XM_001132783 XM_001132785 XM_001132794 | 1,16 |
| 85236 HIST1H2BK    | histone cluster 1, H2bk                                                                                                                                                                                                                                                                     | 1,16 |
| 8263 F8A1          | coagulation factor VIII-associated 1                                                                                                                                                                                                                                                        | 1,16 |
| 65125 WNK1         | WNK lysine deficient protein kinase 1                                                                                                                                                                                                                                                       | 1,15 |

|                   |                                                                                                      |      |
|-------------------|------------------------------------------------------------------------------------------------------|------|
| 348235 SKA2       | spindle and kinetochore associated complex subunit 2                                                 | 1,15 |
| 646050 LOC646050  | axin interactor, dorsalization associated pseudogene                                                 | 1,15 |
| 644336 ILMN_44408 | PREDICTED: Homo sapiens similar to SET domain and mariner transposase fusion gene (LOC644336), mRNA. | 1,15 |
| 96626 LIMS3       | LIM and senescent cell antigen-like domains 3                                                        | 1,15 |
| 25923 ATL3        | atlastin GTPase 3                                                                                    | 1,15 |
| 8714 ILMN_8120    | Homo sapiens ATP-binding cassette, sub-family C (CFTR/MRP), member 3 (ABCC3), mRNA.                  | 1,15 |
| 26469 PTPN18      | protein tyrosine phosphatase, non-receptor type 18 (brain-derived)                                   | 1,14 |
| 5579 PRKCB        | protein kinase C, beta                                                                               | 1,14 |
| 57092 PCNP        | PEST proteolytic signal containing nuclear protein                                                   | 1,14 |
| 8992 ATP6V0E1     | ATPase, H <sup>+</sup> transporting, lysosomal 9kDa, V0 subunit e1                                   | 1,14 |
| 5567 PRKACB       | protein kinase, cAMP-dependent, catalytic, beta                                                      | 1,13 |
| 646227 LOC646227  | cAMP-regulated phosphoprotein 19 pseudogene                                                          | 1,13 |
| 643451 ILMN_31270 | PREDICTED: Homo sapiens hypothetical protein LOC643451 (LOC643451), mRNA.                            | 1,13 |
| 54435 ILMN_42290  | Homo sapiens HLA complex group 4 (HCG4), non-coding RNA.                                             | 1,13 |
| 2280 FKBP1A       | FK506 binding protein 1A, 12kDa                                                                      | 1,13 |
| 8832 CD84         | CD84 molecule                                                                                        | 1,13 |
| 50807 ASAP1       | ArfGAP with SH3 domain, ankyrin repeat and PH domain 1                                               | 1,13 |
| 56950 SMYD2       | SET and MYND domain containing 2                                                                     | 1,12 |
| 326624 ILMN_10097 | Homo sapiens RAB37, member RAS oncogene family (RAB37), transcript variant 1, mRNA.                  | 1,12 |
| 115294 PCMTD1     | protein-L-isoaspartate (D-aspartate) O-methyltransferase domain containing 1                         | 1,12 |
| ILMN_124830       | Homo sapiens cDNA FLJ46527 fis, clone THYMU3034853                                                   | 1,12 |
| 8334 HIST1H2AC    | histone cluster 1, H2ac                                                                              | 1,12 |
| 55683 KIAA1310    | KIAA1310                                                                                             | 1,12 |
| 83658 DYNLRB1     | dynein, light chain, roadblock-type 1                                                                | 1,12 |
| 977 ILMN_44841    | Homo sapiens CD151 molecule (Raph blood group) (CD151), transcript variant 2, mRNA.                  | 1,12 |
| 10093 ARPC4       | actin related protein 2/3 complex, subunit 4, 20kDa                                                  | 1,12 |
| 7534 YWHAZ        | tyrosine 3-monooxygenase/tryptophan 5-monooxygenase activation protein, zeta polypeptide             | 1,11 |
| 9948 WDR1         | WD repeat domain 1                                                                                   | 1,11 |
| 127262 TPRG1L     | tumor protein p63 regulated 1-like                                                                   | 1,11 |
| 55331 ACER3       | alkaline ceramidase 3                                                                                | 1,11 |
| 400948 ILMN_32897 | PREDICTED: Homo sapiens similar to CG33774-PA (LOC400948), mRNA.                                     | 1,11 |
| ILMN_86463        | RST15665 Athersys RAGE Library Homo sapiens cDNA, mRNA sequence                                      | 1,11 |
| 1831 TSC22D3      | TSC22 domain family, member 3                                                                        | 1,1  |

|                  |                                                                                                                  |      |
|------------------|------------------------------------------------------------------------------------------------------------------|------|
| 8848 TSC22D1     | TSC22 domain family, member 1                                                                                    | 1,1  |
| 29780 PARVB      | parvin, beta                                                                                                     | 1,1  |
| 27020 NPTN       | neuroplastin                                                                                                     | 1,1  |
| 51471 NAT8B      | N-acetyltransferase 8B (GCN5-related, putative, gene/pseudogene)                                                 | 1,1  |
| ILMN_75430       | QV4-GN0120-271100-586-d09 GN0120 Homo sapiens cDNA, mRNA sequence                                                | 1,1  |
| 2533 FYB         | FYN binding protein                                                                                              | 1,1  |
| 1982 EIF4G2      | eukaryotic translation initiation factor 4 gamma, 2                                                              | 1,1  |
| 826 CAPNS1       | calpain, small subunit 1                                                                                         | 1,1  |
| 79752 ILMN_23674 | Homo sapiens zinc finger, AN1-type domain 1 (ZFAND1), mRNA.                                                      | 1,09 |
| 5870 RAB6A       | RAB6A, member RAS oncogene family                                                                                | 1,09 |
| 84861 KLHL22     | kelch-like 22 (Drosophila)                                                                                       | 1,09 |
| ILMN_88180       | ir56a05.y1 HR85 islet Homo sapiens cDNA clone IMAGE:6549201 5, mRNA sequence                                     | 1,09 |
| 29940 DSE        | dermatan sulfate epimerase                                                                                       | 1,09 |
| 55973 BCAP29     | B-cell receptor-associated protein 29                                                                            | 1,09 |
| 374618 TEX9      | testis expressed 9                                                                                               | 1,08 |
| 5573 PRKAR1A     | protein kinase, cAMP-dependent, regulatory, type I, alpha (tissue specific extinguisher 1)                       | 1,08 |
| 4684 NCAM1       | neural cell adhesion molecule 1                                                                                  | 1,08 |
| 3611 ILK         | integrin-linked kinase                                                                                           | 1,08 |
| ILMN_130395      | DA957648 SPLEN2 Homo sapiens cDNA clone SPLEN2037016 5, mRNA sequence                                            | 1,08 |
| 369 ARAF         | v-raf murine sarcoma 3611 viral oncogene homolog                                                                 | 1,08 |
| 8859 STK19       | serine/threonine kinase 19                                                                                       | 1,07 |
| 84236 RHBDD1     | rhomboid domain containing 1                                                                                     | 1,07 |
| 11105 ILMN_5534  | Homo sapiens PR domain containing 7 (PRDM7), transcript variant 1, mRNA.                                         | 1,07 |
| 23608 MKRN1      | makorin ring finger protein 1                                                                                    | 1,07 |
| 57179 KIAA1191   | KIAA1191                                                                                                         | 1,07 |
| ILMN_93316       | Homo sapiens cDNA FLJ13548 fis, clone PLACE1007068                                                               | 1,07 |
| 3005 H1FO        | H1 histone family, member 0                                                                                      | 1,07 |
| 337867 UBAC2     | UBA domain containing 2                                                                                          | 1,06 |
| 7027 TFDP1       | transcription factor Dp-1                                                                                        | 1,06 |
| 10507 SEMA4D     | sema domain, immunoglobulin domain (Ig), transmembrane domain (TM) and short cytoplasmic domain, (semaphorin) 4D | 1,06 |
| 57161 PELI2      | pellino homolog 2 (Drosophila)                                                                                   | 1,06 |
| 5175 PECAM1      | platelet/endothelial cell adhesion molecule                                                                      | 1,06 |

|                   |                                                                                                                                                                     |      |
|-------------------|---------------------------------------------------------------------------------------------------------------------------------------------------------------------|------|
| 79772 MCTP1       | multiple C2 domains, transmembrane 1                                                                                                                                | 1,06 |
| 2914 GRM4         | glutamate receptor, metabotropic 4                                                                                                                                  | 1,06 |
| 285527 FRYL       | FRY-like                                                                                                                                                            | 1,06 |
| 80204 FBXO11      | F-box protein 11                                                                                                                                                    | 1,06 |
| 116496 FAM129A    | family with sequence similarity 129, member A                                                                                                                       | 1,06 |
| 1727 CYB5R3       | cytochrome b5 reductase 3                                                                                                                                           | 1,06 |
| 51582 AZIN1       | antizyme inhibitor 1                                                                                                                                                | 1,06 |
| 51382 ATP6V1D     | ATPase, H <sup>+</sup> transporting, lysosomal 34kDa, V1 subunit D                                                                                                  | 1,06 |
| 2534 FYN          | FYN oncogene related to SRC, FGR, YES                                                                                                                               | 1,05 |
| 440915 POTEKP     | POTE ankyrin domain family, member K, pseudogene                                                                                                                    | 1,05 |
| 56990 CDC42SE2    | CDC42 small effector 2                                                                                                                                              | 1,05 |
| 408 ARRB1         | arrestin, beta 1                                                                                                                                                    | 1,05 |
| 51094 ADIPOR1     | adiponectin receptor 1                                                                                                                                              | 1,05 |
| 127933 UHMK1      | U2AF homology motif (UHM) kinase 1                                                                                                                                  | 1,04 |
| 153339 TMEM167A   | transmembrane protein 167A                                                                                                                                          | 1,04 |
| 8780 RIOK3        | RIO kinase 3 (yeast)                                                                                                                                                | 1,04 |
| 5294 ILMN_7736    | Homo sapiens phosphoinositide-3-kinase, catalytic, gamma polypeptide (PIK3CG), mRNA.                                                                                | 1,04 |
| 11235 PDCD10      | programmed cell death 10                                                                                                                                            | 1,04 |
| 649214 ILMN_33279 | PREDICTED: Homo sapiens similar to High mobility group protein 1-like 10 (HMG-1L10), transcript variant 4 (LOC649214), mRNA.                                        | 1,04 |
| 25932 CLIC4       | chloride intracellular channel 4                                                                                                                                    | 1,04 |
| 896 CCND3         | cyclin D3                                                                                                                                                           | 1,04 |
| 400804 ILMN_29977 | Homo sapiens chromosome 1 open reading frame 140 (C1orf140), mRNA.                                                                                                  | 1,04 |
| 223 ALDH9A1       | aldehyde dehydrogenase 9 family, member A1                                                                                                                          | 1,04 |
| 157680 VPS13B     | vacuolar protein sorting 13 homolog B (yeast)                                                                                                                       | 1,03 |
| 56257 MEPCE       | methylphosphate capping enzyme                                                                                                                                      | 1,03 |
| 646463 ILMN_38228 | PREDICTED: Homo sapiens similar to Ubiquitin-conjugating enzyme E2 H (Ubiquitin-protein ligase H) (Ubiquitin carrier protein H) (UBCH2) (E2-20K) (LOC646463), mRNA. | 1,03 |
| 9002 ILMN_43570   | Homo sapiens coagulation factor II (thrombin) receptor-like 3 (F2RL3), mRNA.                                                                                        | 1,03 |
| 10095 ARPC1B      | actin related protein 2/3 complex, subunit 1B, 41kDa                                                                                                                | 1,03 |
| 54470 ILMN_6931   | Homo sapiens armadillo repeat containing, X-linked 6 (ARMCX6), transcript variant 1, mRNA.                                                                          | 1,03 |
| 649395 LOC649395  | tyrosine 3-monooxygenase/tryptophan 5-monooxygenase activation protein, epsilon polypeptide pseudogene                                                              | 1,02 |
| 4673 NAP1L1       | nucleosome assembly protein 1-like 1                                                                                                                                | 1,02 |



|                   |                                                                                                                                                             |       |
|-------------------|-------------------------------------------------------------------------------------------------------------------------------------------------------------|-------|
| 652489 ILMN_36884 | PREDICTED: Homo sapiens similar to SMT3 suppressor of mif two 3 homolog 2 (LOC652489), mRNA.                                                                | 1,02  |
| 3300 DNAJB2       | DnaJ (Hsp40) homolog, subfamily B, member 2                                                                                                                 | 1,02  |
| 54622 ARL15       | ADP-ribosylation factor-like 15                                                                                                                             | 1,02  |
| 9465 AKAP7        | A kinase (PRKA) anchor protein 7                                                                                                                            | 1,02  |
| 7739 ZNF185       | zinc finger protein 185 (LIM domain)                                                                                                                        | 1,01  |
| 5908 ILMN_166610  | Homo sapiens RAP1B, member of RAS oncogene family (RAP1B), transcript variant 1, mRNA.                                                                      | 1,01  |
| 5257 PHKB         | phosphorylase kinase, beta                                                                                                                                  | 1,01  |
| 3725 JUN          | jun proto-oncogene                                                                                                                                          | 1,01  |
| 3636 INPPL1       | inositol polyphosphate phosphatase-like 1                                                                                                                   | 1,01  |
| 85236 ILMN_17974  | Homo sapiens histone cluster 1, H2bk (HIST1H2BK), mRNA.                                                                                                     | 1,01  |
| 64423 INF2        | inverted formin, FH2 and WH2 domain containing                                                                                                              | 1,01  |
| 665 BNIP3L        | BCL2/adenovirus E1B 19kDa interacting protein 3-like                                                                                                        | 1,01  |
| 7360 ILMN_24416   | Homo sapiens UDP-glucose pyrophosphorylase 2 (UGP2), transcript variant 1, mRNA.                                                                            | 1     |
| 57187 THOC2       | THO complex 2                                                                                                                                               | 1     |
| 3516 RBPJ         | recombination signal binding protein for immunoglobulin kappa J region                                                                                      | 1     |
| 5567 PRKACB       | protein kinase, cAMP-dependent, catalytic, beta                                                                                                             | 1     |
| 1355 ILMN_14561   | Homo sapiens COX15 homolog, cytochrome c oxidase assembly protein (yeast) (COX15), nuclear gene encoding mitochondrial protein, transcript variant 1, mRNA. | 1     |
| 10282 BET1        | blocked early in transport 1 homolog (S. cerevisiae)                                                                                                        | 1     |
| 10632 ATP5L       | ATP synthase, H <sup>+</sup> transporting, mitochondrial Fo complex, subunit G                                                                              | 1     |
| 140885 SIRPA      | signal-regulatory protein alpha                                                                                                                             | -1    |
| 10125 RASGRP1     | RAS guanyl releasing protein 1 (calcium and DAG-regulated)                                                                                                  | -1    |
| 22827 PUF60       | poly-U binding splicing factor 60KDa                                                                                                                        | -1    |
| 55035 NOL8        | nucleolar protein 8                                                                                                                                         | -1    |
| 4691 NCL          | nucleolin                                                                                                                                                   | -1    |
| 91663 MYADM       | myeloid-associated differentiation marker                                                                                                                   | -1    |
| ILMN_136538       | DB027523 TESTI2 Homo sapiens cDNA clone TESTI2010045 5, mRNA sequence                                                                                       | -1    |
| 11033 ADAP1       | ArfGAP with dual PH domains 1                                                                                                                               | -1    |
| 55101 ILMN_12644  | Homo sapiens ATP5S-like (ATP5SL), mRNA.                                                                                                                     | -1    |
| 79852 EPHX3       | epoxide hydrolase 3                                                                                                                                         | -1    |
| 92912 UBE2Q2      | ubiquitin-conjugating enzyme E2Q family member 2                                                                                                            | -1,01 |
| 7327 UBE2G2       | ubiquitin-conjugating enzyme E2G 2                                                                                                                          | -1,01 |
| 11262 SP140       | SP140 nuclear body protein                                                                                                                                  | -1,01 |

|        |             |                                                                                                              |       |
|--------|-------------|--------------------------------------------------------------------------------------------------------------|-------|
| 6427   | SRSF2       | serine/arginine-rich splicing factor 2                                                                       | -1,01 |
| 9045   | RPL14       | ribosomal protein L14                                                                                        | -1,01 |
| 5435   | POLR2F      | polymerase (RNA) II (DNA directed) polypeptide F                                                             | -1,01 |
| 4688   | ILMN_8146   | Homo sapiens neutrophil cytosolic factor 2 (65kDa, chronic granulomatous disease, autosomal 2) (NCF2), mRNA. | -1,01 |
| 439949 | LOC439949   | hypothetical LOC439949                                                                                       | -1,01 |
| 8761   | PABPC4      | poly(A) binding protein, cytoplasmic 4 (inducible form)                                                      | -1,01 |
|        | ILMN_119133 | wb37h11.x1 NCI_CGAP_GC6 Homo sapiens cDNA clone IMAGE:2307909 3, mRNA sequence                               | -1,01 |
| 27069  | GHITM       | growth hormone inducible transmembrane protein                                                               | -1,01 |
| 10480  | EIF3M       | eukaryotic translation initiation factor 3, subunit M                                                        | -1,01 |
| 728358 | ILMN_11220  | Homo sapiens defensin, alpha 1B (DEFA1B), mRNA.                                                              | -1,01 |
| 972    | CD74        | CD74 molecule, major histocompatibility complex, class II invariant chain                                    | -1,01 |
| 25798  | BRI3        | brain protein I3                                                                                             | -1,01 |
| 6856   | SYPL1       | synaptophysin-like 1                                                                                         | -1,02 |
| 8675   | STX16       | syntaxin 16                                                                                                  | -1,02 |
| 728609 | ILMN_175112 | Homo sapiens succinate dehydrogenase complex, subunit A, flavoprotein pseudogene 3 (SDHAP3) on chromosome 5. | -1,02 |
| 6222   | RPS18       | ribosomal protein S18                                                                                        | -1,02 |
| 6204   | RPS10       | ribosomal protein S10                                                                                        | -1,02 |
| 644029 | ILMN_34790  | PREDICTED: Homo sapiens similar to 60S ribosomal protein L7a (LOC644029), mRNA.                              | -1,02 |
| 643313 | ILMN_44117  | PREDICTED: Homo sapiens similar to hypothetical protein LOC284701, transcript variant 1 (LOC643313), mRNA.   | -1,02 |
| 200030 | ILMN_10536  | Homo sapiens neuroblastoma breakpoint family, member 11-like (LOC200030), mRNA.                              | -1,02 |
|        | ILMN_104476 | zj45e10.s1 Soares_fetal_liver_spleen_1NFLS_S1 Homo sapiens cDNA clone IMAGE:453258 3, mRNA sequence          | -1,02 |
| 10818  | FRS2        | fibroblast growth factor receptor substrate 2                                                                | -1,02 |
| 116988 | AGAP3       | ArfGAP with GTPase domain, ankyrin repeat and PH domain 3                                                    | -1,02 |
| 829    | CAPZA1      | capping protein (actin filament) muscle Z-line, alpha 1                                                      | -1,02 |
| 694    | BTG1        | B-cell translocation gene 1, anti-proliferative                                                              | -1,02 |
| 3431   | SP110       | SP110 nuclear body protein                                                                                   | -1,03 |
| 644131 | CCT8P1      | chaperonin containing TCP1, subunit 8 (theta) pseudogene 1                                                   | -1,03 |
| 6161   | RPL32       | ribosomal protein L32                                                                                        | -1,03 |
| 1431   | CS          | citrate synthase                                                                                             | -1,03 |
| 6767   | ST13        | suppression of tumorigenicity 13 (colon carcinoma) (Hsp70 interacting protein)                               | -1,04 |
| 6342   | SCP2        | sterol carrier protein 2                                                                                     | -1,04 |
| 5089   | ILMN_7500   | Homo sapiens pre-B-cell leukemia homeobox 2 (PBX2), mRNA.                                                    | -1,04 |
| 6885   | MAP3K7      | mitogen-activated protein kinase kinase kinase 7                                                             | -1,04 |

|                   |                                                                                                                                                                          |       |
|-------------------|--------------------------------------------------------------------------------------------------------------------------------------------------------------------------|-------|
| 653559 ILMN_43625 | PREDICTED: Homo sapiens similar to Rho-associated protein kinase 1 (Rho-associated, coiled-coil containing protein kinase 1) (p160 ROCK-1) (p160ROCK) (LOC653559), mRNA. | -1,04 |
| 646144 ILMN_45842 | PREDICTED: Homo sapiens similar to tousled-like kinase 2, transcript variant 2 (LOC646144), mRNA.                                                                        | -1,04 |
| 643920 ILMN_39946 | PREDICTED: Homo sapiens region containing similar to Williams Beuren syndrome chromosome region 19; hypothetical LOC441257, transcript variant 2 (LOC643920), mRNA.      | -1,04 |
| 642934 ILMN_33728 | PREDICTED: Homo sapiens hypothetical LOC642934 (LOC642934), mRNA.                                                                                                        | -1,04 |
| 11100 HNRNPUL1    | heterogeneous nuclear ribonucleoprotein U-like 1                                                                                                                         | -1,04 |
| 2949 GSTM5        | glutathione S-transferase mu 5                                                                                                                                           | -1,04 |
| 349152 ILMN_15856 | Homo sapiens dpy-19-like 2 pseudogene 2 (C. elegans) (DPY19L2P2), non-coding RNA.                                                                                        | -1,04 |
| 53981 ILMN_181110 | Homo sapiens cleavage and polyadenylation specific factor 2, 100kDa (CPSF2), mRNA.                                                                                       | -1,04 |
| 1236 CCR7         | chemokine (C-C motif) receptor 7                                                                                                                                         | -1,04 |
| 303 ANXA2P1       | annexin A2 pseudogene 1                                                                                                                                                  | -1,04 |
| 3268 AGFG2        | ArfGAP with FG repeats 2                                                                                                                                                 | -1,04 |
| 54915 YTHDF1      | YTH domain family, member 1                                                                                                                                              | -1,05 |
| 25777 SUN2        | Sad1 and UNC84 domain containing 2                                                                                                                                       | -1,05 |
| 29108 PYCARD      | PYD and CARD domain containing                                                                                                                                           | -1,05 |
| 5788 PTPRC        | protein tyrosine phosphatase, receptor type, C                                                                                                                           | -1,05 |
| 5687 PSMA6        | proteasome (prosome, macropain) subunit, alpha type, 6                                                                                                                   | -1,05 |
| 90007 MIDN        | midnolin                                                                                                                                                                 | -1,05 |
| 79863 RBFA        | ribosome binding factor A (putative)                                                                                                                                     | -1,05 |
| 121274 ZNF641     | zinc finger protein 641                                                                                                                                                  | -1,06 |
| 6161 RPL32        | ribosomal protein L32                                                                                                                                                    | -1,06 |
| 9991 ROD1         | ROD1 regulator of differentiation 1 (S. pombe)                                                                                                                           | -1,06 |
| 57665 RDH14       | retinol dehydrogenase 14 (all-trans/9-cis/11-cis)                                                                                                                        | -1,06 |
| 3804 KIR2DL3      | killer cell immunoglobulin-like receptor, two domains, long cytoplasmic tail, 3                                                                                          | -1,06 |
| 9551 ATP5J2       | ATP synthase, H <sup>+</sup> transporting, mitochondrial Fo complex, subunit F2                                                                                          | -1,06 |
| 11040 ILMN_27932  | Homo sapiens pim-2 oncogene (PIM2), mRNA.                                                                                                                                | -1,07 |
| 7940 LST1         | leukocyte specific transcript 1                                                                                                                                          | -1,07 |
| 645489 ILMN_41776 | PREDICTED: Homo sapiens hypothetical protein LOC645489 (LOC645489), mRNA.                                                                                                | -1,07 |
| 3805 ILMN_16588   | Homo sapiens killer cell immunoglobulin-like receptor, two domains, long cytoplasmic tail, 4 (KIR2DL4), mRNA.                                                            | -1,07 |
| 1370 ILMN_42585   | PREDICTED: Homo sapiens carboxypeptidase N, polypeptide 2, 83kD (CPN2), mRNA.                                                                                            | -1,07 |
| 285382 C3orf70    | chromosome 3 open reading frame 70                                                                                                                                       | -1,07 |
| 8725 C19orf2      | chromosome 19 open reading frame 2                                                                                                                                       | -1,07 |

|                   |                                                                                                  |       |
|-------------------|--------------------------------------------------------------------------------------------------|-------|
| 83719 YPEL3       | yippee-like 3 (Drosophila)                                                                       | -1,08 |
| 255758 TCTEX1D2   | Tctex1 domain containing 2                                                                       | -1,08 |
| 7979 SHFM1        | split hand/foot malformation (ectrodactyly) type 1                                               | -1,08 |
| 51316 PLAC8       | placenta-specific 8                                                                              | -1,08 |
| 402110 ILMN_21477 | Homo sapiens hypothetical LOC402110 (LOC402110), mRNA.                                           | -1,08 |
| 158345 ILMN_36732 | PREDICTED: Homo sapiens similar to ribosomal protein L4 (LOC158345), mRNA.                       | -1,08 |
| 123876 ILMN_25856 | Homo sapiens hypothetical protein LOC123876 (LOC123876), mRNA.                                   | -1,08 |
| 9815 GIT2         | G protein-coupled receptor kinase interacting ArfGAP 2                                           | -1,08 |
| 1668 ILMN_11220   | Homo sapiens defensin, alpha 3, neutrophil-specific (DEFA3), mRNA.                               | -1,08 |
| 841 CASP8         | caspase 8, apoptosis-related cysteine peptidase                                                  | -1,08 |
| 7430 EZR          | ezrin                                                                                            | -1,09 |
| 56910 STARD7      | StAR-related lipid transfer (START) domain containing 7                                          | -1,09 |
| 10181 RBM5        | RNA binding motif protein 5                                                                      | -1,09 |
| 440345 ILMN_43785 | PREDICTED: Homo sapiens hypothetical protein LOC440345, transcript variant 5 (LOC440345), mRNA.  | -1,09 |
| 168537 GIMAP7     | GTPase, IMAP family member 7                                                                     | -1,09 |
| 57609 DIP2B       | DIP2 disco-interacting protein 2 homolog B (Drosophila)                                          | -1,09 |
| 1667 ILMN_29692   | Homo sapiens defensin, alpha 1 (DEFA1), mRNA.                                                    | -1,09 |
| 11325 DDX42       | DEAD (Asp-Glu-Ala-Asp) box polypeptide 42                                                        | -1,09 |
| 521 ATP5I         | ATP synthase, H <sup>+</sup> transporting, mitochondrial Fo complex, subunit E                   | -1,09 |
| 10476 ATP5H       | ATP synthase, H <sup>+</sup> transporting, mitochondrial Fo complex, subunit d                   | -1,09 |
| 644037 HNRNPA1P12 | heterogeneous nuclear ribonucleoprotein A1 pseudogene 12                                         | -1,1  |
| ILMN_115736       | HSC1JB062 normalized infant brain cDNA Homo sapiens cDNA clone c-1jb06 3, mRNA sequence          | -1,1  |
| 8893 EIF2B5       | eukaryotic translation initiation factor 2B, subunit 5 epsilon, 82kDa                            | -1,1  |
| 919 CD247         | CD247 molecule                                                                                   | -1,1  |
| 6232 RPS27        | ribosomal protein S27                                                                            | -1,11 |
| 6129 RPL7         | ribosomal protein L7                                                                             | -1,11 |
| 4736 RPL10A       | ribosomal protein L10a                                                                           | -1,11 |
| 6129 RPL7         | ribosomal protein L7                                                                             | -1,11 |
| 645385 ILMN_33113 | PREDICTED: Homo sapiens similar to heterogeneous nuclear ribonucleoprotein A1 (LOC645385), mRNA. | -1,11 |
| 6129 RPL7         | ribosomal protein L7                                                                             | -1,11 |
| 10437 IFI30       | interferon, gamma-inducible protein 30                                                           | -1,11 |
| 115362 GBP5       | guanylate binding protein 5                                                                      | -1,11 |
| 23401 FRAT2       | frequently rearranged in advanced T-cell lymphomas 2                                             | -1,11 |

|                  |                                                                                                                                                        |       |
|------------------|--------------------------------------------------------------------------------------------------------------------------------------------------------|-------|
| 25940 FAM98A     | family with sequence similarity 98, member A                                                                                                           | -1,11 |
| 10658 ILMN_10496 | Homo sapiens CUG triplet repeat, RNA binding protein 1 (CUGBP1), transcript variant 2, mRNA.                                                           | -1,11 |
| 150684 COMMD1    | copper metabolism (Murr1) domain containing 1                                                                                                          | -1,11 |
| 7576 ILMN_8130   | Homo sapiens zinc finger protein 28 (ZNF28), mRNA.                                                                                                     | -1,12 |
| 4046 LSP1        | lymphocyte-specific protein 1                                                                                                                          | -1,12 |
| 145165 ST13P4    | suppression of tumorigenicity 13 (colon carcinoma) (Hsp70 interacting protein) pseudogene 4                                                            | -1,12 |
| 9337 CNOT8       | CCR4-NOT transcription complex, subunit 8                                                                                                              | -1,12 |
| 51385 ZNF589     | zinc finger protein 589                                                                                                                                | -1,13 |
| 7127 ILMN_16372  | Homo sapiens tumor necrosis factor, alpha-induced protein 2 (TNFAIP2), mRNA.                                                                           | -1,13 |
| 441502 RPS26P11  | ribosomal protein S26 pseudogene 11                                                                                                                    | -1,13 |
| 643310 ST13P18   | suppression of tumorigenicity 13 (colon carcinoma) (Hsp70 interacting protein) pseudogene 18                                                           | -1,13 |
| 10542 HBXIP      | hepatitis B virus x interacting protein                                                                                                                | -1,13 |
| 7555 CNBP        | CCHC-type zinc finger, nucleic acid binding protein                                                                                                    | -1,13 |
| 200316 ILMN_1659 | Homo sapiens apolipoprotein B mRNA editing enzyme, catalytic polypeptide-like 3F (APOBEC3F), transcript variant 1, mRNA.                               | -1,13 |
| 303 ANXA2P1      | annexin A2 pseudogene 1                                                                                                                                | -1,13 |
| 7267 TTC3        | tetratricopeptide repeat domain 3                                                                                                                      | -1,14 |
| 6166 RPL36AL     | ribosomal protein L36a-like                                                                                                                            | -1,14 |
| 118433 ILMN_3185 | Homo sapiens ribosomal protein L23a pseudogene 7 (RPL23AP7) on chromosome 2.                                                                           | -1,14 |
| 8241 RBM10       | RNA binding motif protein 10                                                                                                                           | -1,14 |
| 8566 PDXK        | pyridoxal (pyridoxine, vitamin B6) kinase                                                                                                              | -1,14 |
| 3385 ICAM3       | intercellular adhesion molecule 3                                                                                                                      | -1,14 |
| 50809 HP1BP3     | heterochromatin protein 1, binding protein 3                                                                                                           | -1,15 |
| 8338 HIST2H2AC   | histone cluster 2, H2ac                                                                                                                                | -1,15 |
| 55140 ELP3       | elongation protein 3 homolog (S. cerevisiae)                                                                                                           | -1,15 |
| 1933 EEF1B2      | eukaryotic translation elongation factor 1 beta 2                                                                                                      | -1,15 |
| 9170 LPAR2       | lysophosphatidic acid receptor 2                                                                                                                       | -1,15 |
| 10521 DDX17      | DEAD (Asp-Glu-Ala-Asp) box polypeptide 17                                                                                                              | -1,15 |
| 9184 BUB3        | budding uninhibited by benzimidazoles 3 homolog (yeast)                                                                                                | -1,15 |
| 8635 RNASET2     | ribonuclease T2                                                                                                                                        | -1,16 |
| 3689 ILMN_138267 | Homo sapiens integrin, beta 2 (antigen CD18 (p95), lymphocyte function-associated antigen 1; macrophage antigen 1 (mac-1) beta subunit) (ITGB2), mRNA. | -1,16 |
| 1642 DDB1        | damage-specific DNA binding protein 1, 127kDa                                                                                                          | -1,16 |

|                    |                                                                                                                                               |       |
|--------------------|-----------------------------------------------------------------------------------------------------------------------------------------------|-------|
| 55196 C12orf35     | chromosome 12 open reading frame 35                                                                                                           | -1,16 |
| 23753 SDF2L1       | stromal cell-derived factor 2-like 1                                                                                                          | -1,17 |
| 79671 NLRX1        | NLR family member X1                                                                                                                          | -1,17 |
| 728554 ILMN_137226 | PREDICTED: Homo sapiens similar to THO complex 3 (LOC728554), mRNA.                                                                           | -1,17 |
| 389435 ILMN_30712  | Homo sapiens hCG21078 (LOC389435), mRNA.                                                                                                      | -1,17 |
| 85376 ILMN_37441   | PREDICTED: Homo sapiens KIAA1666 protein (KIAA1666), mRNA.                                                                                    | -1,17 |
| 2289 FKBP5         | FK506 binding protein 5                                                                                                                       | -1,17 |
| 8721 EDF1          | endothelial differentiation-related factor 1                                                                                                  | -1,17 |
| 54541 DDIT4        | DNA-damage-inducible transcript 4                                                                                                             | -1,17 |
| 648237 ILMN_40504  | PREDICTED: Homo sapiens similar to 60S ribosomal protein L10 (QM protein) (Tumor suppressor QM) (Laminin receptor homolog) (LOC648237), mRNA. | -1,18 |
| 3482 IGF2R         | insulin-like growth factor 2 receptor                                                                                                         | -1,18 |
| 868 CBLB           | Cas-Br-M (murine) ecotropic retroviral transforming sequence b                                                                                | -1,18 |
| 148789 B3GALNT2    | beta-1,3-N-acetylgalactosaminyltransferase 2                                                                                                  | -1,18 |
| 120425 AMICA1      | adhesion molecule, interacts with CXADR antigen 1                                                                                             | -1,18 |
| 8795 TNFRSF10B     | tumor necrosis factor receptor superfamily, member 10b                                                                                        | -1,19 |
| 6778 STAT6         | signal transducer and activator of transcription 6, interleukin-4 induced                                                                     | -1,19 |
| 80143 SIKE1        | suppressor of IKBKE 1                                                                                                                         | -1,19 |
| 5871 MAP4K2        | mitogen-activated protein kinase kinase kinase kinase 2                                                                                       | -1,19 |
| 728734 ILMN_12371  | PREDICTED: Homo sapiens similar to kidney-specific protein (KS), transcript variant 1 (LOC728734), mRNA.                                      | -1,19 |
| 6234 RPS28         | ribosomal protein S28                                                                                                                         | -1,19 |
| 613037 LOC613037   | nuclear pore complex interacting protein pseudogene                                                                                           | -1,19 |
| 146053 ILMN_40640  | PREDICTED: Homo sapiens similar to ribosomal protein S3a, transcript variant 4 (LOC146053), mRNA.                                             | -1,19 |
| 3067 HDC           | histidine decarboxylase                                                                                                                       | -1,19 |
| 689 BTF3           | basic transcription factor 3                                                                                                                  | -1,19 |
| 9349 RPL23         | ribosomal protein L23                                                                                                                         | -1,2  |
| 5788 PTPRC         | protein tyrosine phosphatase, receptor type, C                                                                                                | -1,2  |
| 4332 MNDA          | myeloid cell nuclear differentiation antigen                                                                                                  | -1,2  |
| 645688 ILMN_35293  | PREDICTED: Homo sapiens similar to 60S ribosomal protein L12 (LOC645688), mRNA.                                                               | -1,2  |
| 3303 HSPA1A        | heat shock 70kDa protein 1A                                                                                                                   | -1,2  |
| ILMN_127075        | BX096001 Soares fetal liver spleen 1NFLS Homo sapiens cDNA clone IMAGp998O09393, mRNA sequence                                                | -1,2  |
| 2948 ILMN_4003     | Homo sapiens glutathione S-transferase M4 (GSTM4), transcript variant 2, mRNA.                                                                | -1,2  |
| 89853 FAM125B      | family with sequence similarity 125, member B                                                                                                 | -1,2  |

|                   |                                                                                  |       |
|-------------------|----------------------------------------------------------------------------------|-------|
| 23468 CBX5        | chromobox homolog 5                                                              | -1,2  |
| 26136 TES         | testis derived transcript (3 LIM domains)                                        | -1,21 |
| 6132 RPL8         | ribosomal protein L8                                                             | -1,21 |
| 6128 RPL6         | ribosomal protein L6                                                             | -1,21 |
| 11159 RABL2A      | RAB, member of RAS oncogene family-like 2A                                       | -1,21 |
| 4809 NHP2L1       | NHP2 non-histone chromosome protein 2-like 1 ( <i>S. cerevisiae</i> )            | -1,21 |
| 645899 ILMN_42597 | PREDICTED: Homo sapiens similar to 40S ribosomal protein S28 (LOC645899), mRNA.  | -1,21 |
| 8665 EIF3F        | eukaryotic translation initiation factor 3, subunit F                            | -1,21 |
| 221960 C7orf28B   | chromosome 7 open reading frame 28B                                              | -1,21 |
| 596 BCL2          | B-cell CLL/lymphoma 2                                                            | -1,21 |
| 2113 ETS1         | v-ets erythroblastosis virus E26 oncogene homolog 1 (avian)                      | -1,22 |
| 64744 SMAP2       | small ArfGAP2                                                                    | -1,23 |
| 6280 S100A9       | S100 calcium binding protein A9                                                  | -1,23 |
| 6205 RPS11        | ribosomal protein S11                                                            | -1,23 |
| 5547 PRCP         | prolylcarboxypeptidase (angiotensinase C)                                        | -1,23 |
| 79960 PHF17       | PHD finger protein 17                                                            | -1,23 |
| 9045 RPL14        | ribosomal protein L14                                                            | -1,23 |
| 646350 ILMN_39634 | PREDICTED: Homo sapiens similar to 60S ribosomal protein L39 (LOC646350), mRNA.  | -1,23 |
| 10261 IGSF6       | immunoglobulin superfamily, member 6                                             | -1,23 |
| 142 ILMN_3056     | Homo sapiens poly (ADP-ribose) polymerase family, member 1 (PARP1), mRNA.        | -1,24 |
| 6228 RPS23        | ribosomal protein S23                                                            | -1,24 |
| 2483 FRG1         | FSHD region gene 1                                                               | -1,24 |
| 3936 LCP1         | lymphocyte cytosolic protein 1 (L-plastin)                                       | -1,24 |
| 3329 HSPD1        | heat shock 60kDa protein 1 (chaperonin)                                          | -1,24 |
| 3059 HCLS1        | hematopoietic cell-specific Lyn substrate 1                                      | -1,24 |
| 2091 FBL          | fibrillarin                                                                      | -1,24 |
| 689 BTF3          | basic transcription factor 3                                                     | -1,24 |
| 9551 ATP5J2       | ATP synthase, H <sup>+</sup> transporting, mitochondrial Fo complex, subunit F2  | -1,24 |
| 64333 ARHGAP9     | Rho GTPase activating protein 9                                                  | -1,24 |
| 57050 UTP3        | UTP3, small subunit (SSU) processome component, homolog ( <i>S. cerevisiae</i> ) | -1,25 |
| 81929 SEH1L       | SEH1-like ( <i>S. cerevisiae</i> )                                               | -1,25 |
| 6230 RPS25        | ribosomal protein S25                                                            | -1,25 |
| 284194 LGALS9B    | lectin, galactoside-binding, soluble, 9B                                         | -1,25 |



|        |             |                                                                                         |       |
|--------|-------------|-----------------------------------------------------------------------------------------|-------|
| 51759  | C9orf78     | chromosome 9 open reading frame 78                                                      | -1,25 |
| 10961  | ERP29       | endoplasmic reticulum protein 29                                                        | -1,25 |
| 6169   | RPL38       | ribosomal protein L38                                                                   | -1,26 |
| 4245   | MGAT1       | mannosyl (alpha-1,3-)-glycoprotein beta-1,2-N-acetylglucosaminyltransferase             | -1,26 |
| 8366   | HIST1H4B    | histone cluster 1, H4b                                                                  | -1,26 |
| 23167  | EFR3A       | EFR3 homolog A (S. cerevisiae)                                                          | -1,26 |
| 115761 | ARL11       | ADP-ribosylation factor-like 11                                                         | -1,26 |
| 388078 | ILMN_31332  | PREDICTED: Homo sapiens V-set and immunoglobulin domain containing 6 (VSIG6), mRNA.     | -1,27 |
| 11066  | SNRNP35     | small nuclear ribonucleoprotein 35kDa (U11/U12)                                         | -1,27 |
| 5859   | QARS        | glutaminyl-tRNA synthetase                                                              | -1,27 |
| 653232 | ILMN_31434  | PREDICTED: Homo sapiens hypothetical LOC653232, transcript variant 4 (LOC653232), mRNA. | -1,27 |
| 644131 | CCT8P1      | chaperonin containing TCP1, subunit 8 (theta) pseudogene 1                              | -1,27 |
| 9807   | IP6K1       | inositol hexakisphosphate kinase 1                                                      | -1,27 |
| 6742   | SSBP1       | single-stranded DNA binding protein 1                                                   | -1,28 |
| 6223   | RPS19       | ribosomal protein S19                                                                   | -1,28 |
| 642333 | ILMN_40016  | PREDICTED: Homo sapiens similar to M-phase phosphoprotein, mpp8 (LOC642333), mRNA.      | -1,28 |
| 3727   | ILMN_29325  | Homo sapiens jun D proto-oncogene (JUND), mRNA.                                         | -1,28 |
| 7416   | VDAC1       | voltage-dependent anion channel 1                                                       | -1,29 |
| 26019  | UPF2        | UPF2 regulator of nonsense transcripts homolog (yeast)                                  | -1,29 |
| 6208   | RPS14       | ribosomal protein S14                                                                   | -1,29 |
| 645683 | RPL13AP3    | ribosomal protein L13a pseudogene 3                                                     | -1,29 |
| 54832  | VPS13C      | vacuolar protein sorting 13 homolog C (S. cerevisiae)                                   | -1,3  |
| 51667  | NUB1        | negative regulator of ubiquitin-like proteins 1                                         | -1,3  |
| 642817 | ILMN_46700  | PREDICTED: Homo sapiens hypothetical LOC642817 (LOC642817), mRNA.                       | -1,3  |
|        | ILMN_130610 | DB337110 TESTI2 Homo sapiens cDNA clone TESTI2016331 3, mRNA sequence                   | -1,3  |
| 22918  | CD93        | CD93 molecule                                                                           | -1,3  |
| 94104  | GCFC1       | GC-rich sequence DNA-binding factor 1                                                   | -1,3  |
| 55729  | ATF7IP      | activating transcription factor 7 interacting protein                                   | -1,3  |
| 7175   | TPR         | translocated promoter region (to activated MET oncogene)                                | -1,31 |
| 26207  | PITPNC1     | phosphatidylinositol transfer protein, cytoplasmic 1                                    | -1,31 |
| 23117  | ILMN_44181  | PREDICTED: Homo sapiens KIAA0220-like protein, transcript variant 16 (LOC23117), mRNA.  | -1,31 |
| 10922  | FASTK       | Fas-activated serine/threonine kinase                                                   | -1,31 |
| 51335  | NGRN        | neugrin, neurite outgrowth associated                                                   | -1,32 |



|                    |                                                                                              |       |
|--------------------|----------------------------------------------------------------------------------------------|-------|
| 374395 TMEM179B    | transmembrane protein 179B                                                                   | -1,32 |
| 11158 RABL2B       | RAB, member of RAS oncogene family-like 2B                                                   | -1,33 |
| 64976 MRPL40       | mitochondrial ribosomal protein L40                                                          | -1,33 |
| 606724 ILMN_9207   | Homo sapiens coronin, actin binding protein, 1A pseudogene (LOC606724), non-coding RNA.      | -1,33 |
| 6230 RPS25         | ribosomal protein S25                                                                        | -1,33 |
| 10412 NSA2         | NSA2 ribosome biogenesis homolog (S. cerevisiae)                                             | -1,34 |
| 728358 ILMN_176067 | Homo sapiens defensin, alpha 1B (DEFA1B), mRNA.                                              | -1,34 |
| 302 ANXA2          | annexin A2                                                                                   | -1,34 |
| 85464 SSH2         | slingshot homolog 2 (Drosophila)                                                             | -1,35 |
| 400156 ILMN_38819  | PREDICTED: Homo sapiens 40S ribosomal protein S26-like (RPS26L), misc RNA.                   | -1,35 |
| 6217 RPS16         | ribosomal protein S16                                                                        | -1,35 |
| 6154 RPL26         | ribosomal protein L26                                                                        | -1,35 |
| 126382 NR2C2AP     | nuclear receptor 2C2-associated protein                                                      | -1,35 |
| 4728 NDUF8         | NADH dehydrogenase (ubiquinone) Fe-S protein 8, 23kDa (NADH-coenzyme Q reductase)            | -1,35 |
| 402694 ILMN_32451  | Homo sapiens similar to ribosomal protein L15 (LOC402694), mRNA.                             | -1,35 |
| 2802 GOLGA3        | golgin A3                                                                                    | -1,35 |
| 50854 C6orf48      | chromosome 6 open reading frame 48                                                           | -1,35 |
| 9984 THOC1         | THO complex 1                                                                                | -1,36 |
| 4689 NCF4          | neutrophil cytosolic factor 4, 40kDa                                                         | -1,36 |
| 653232 ILMN_41130  | PREDICTED: Homo sapiens hypothetical LOC653232, transcript variant 4 (LOC653232), mRNA.      | -1,36 |
| 6187 RPS2          | ribosomal protein S2                                                                         | -1,36 |
| 7462 LAT2          | linker for activation of T cells family, member 2                                            | -1,36 |
| 5694 PSMB6         | proteasome (prosome, macropain) subunit, beta type, 6                                        | -1,37 |
| 648622 ILMN_42936  | PREDICTED: Homo sapiens similar to ribosomal protein S27 (LOC648622), mRNA.                  | -1,37 |
| 3128 HLA-DRB6      | major histocompatibility complex, class II, DR beta 6 (pseudogene)                           | -1,37 |
| 1975 EIF4B         | eukaryotic translation initiation factor 4B                                                  | -1,37 |
| 90416 C15orf57     | chromosome 15 open reading frame 57                                                          | -1,37 |
| 80335 WDR82        | WD repeat domain 82                                                                          | -1,38 |
| 6189 RPS3A         | ribosomal protein S3A                                                                        | -1,38 |
| 59339 PLEKHA2      | pleckstrin homology domain containing, family A (phosphoinositide binding specific) member 2 | -1,38 |
| 649548 ILMN_31442  | PREDICTED: Homo sapiens similar to 60S ribosomal protein L32 (LOC649548), mRNA.              | -1,38 |
| ILMN_108776        | od80c09.s1 NCI_CGAP_Ov2 Homo sapiens cDNA clone IMAGE:1374256, mRNA sequence                 | -1,38 |
| 84881 RPUSD4       | RNA pseudouridylate synthase domain containing 4                                             | -1,39 |

|                   |                                                                                                                                 |       |
|-------------------|---------------------------------------------------------------------------------------------------------------------------------|-------|
| 27303 RBMS3       | RNA binding motif, single stranded interacting protein 3                                                                        | -1,39 |
| 55239 ILMN_16561  | Homo sapiens 2-oxoglutarate and iron-dependent oxygenase domain containing 1 (OGFOD1), mRNA.                                    | -1,39 |
| 4144 MAT2A        | methionine adenosyltransferase II, alpha                                                                                        | -1,39 |
| 23405 DICER1      | dicer 1, ribonuclease type III                                                                                                  | -1,39 |
| 83880 ILMN_9478   | Homo sapiens IFP38 (IFP38), mRNA.                                                                                               | -1,39 |
| 1933 ILMN_4325    | Homo sapiens eukaryotic translation elongation factor 1 beta 2 (EEF1B2), transcript variant 3, mRNA.                            | -1,39 |
| 5898 RALA         | v-ral simian leukemia viral oncogene homolog A (ras related)                                                                    | -1,4  |
| 6146 RPL22        | ribosomal protein L22                                                                                                           | -1,4  |
| 6187 RPS2         | ribosomal protein S2                                                                                                            | -1,4  |
| 2197 FAU          | Finkel-Biskis-Reilly murine sarcoma virus (FBR-MuSV) ubiquitously expressed                                                     | -1,4  |
| 1973 EIF4A1       | eukaryotic translation initiation factor 4A1                                                                                    | -1,4  |
| 2181 ACSL3        | acyl-CoA synthetase long-chain family member 3                                                                                  | -1,4  |
| 7247 TSN          | translin                                                                                                                        | -1,41 |
| 5695 PSMB7        | proteasome (prosome, macropain) subunit, beta type, 7                                                                           | -1,41 |
| 5336 PLCG2        | phospholipase C, gamma 2 (phosphatidylinositol-specific)                                                                        | -1,41 |
| 23484 LEPROTL1    | leptin receptor overlapping transcript-like 1                                                                                   | -1,41 |
| 56683 C21orf59    | chromosome 21 open reading frame 59                                                                                             | -1,41 |
| 526 ATP6V1B2      | ATPase, H <sup>+</sup> transporting, lysosomal 56/58kDa, V1 subunit B2                                                          | -1,41 |
| 6625 SNRNP70      | small nuclear ribonucleoprotein 70kDa (U1)                                                                                      | -1,42 |
| 9360 PPIG         | peptidylprolyl isomerase G (cyclophilin G)                                                                                      | -1,42 |
| 6134 RPL10        | ribosomal protein L10                                                                                                           | -1,42 |
| 441032 ILMN_46443 | PREDICTED: Homo sapiens similar to eukaryotic translation elongation factor 1 alpha 1, transcript variant 11 (LOC441032), mRNA. | -1,42 |
| ILMN_114404       | yu05d06.s1 Soares fetal liver spleen 1NFLS Homo sapiens cDNA clone IMAGE:232907 3, mRNA sequence                                | -1,42 |
| 1629 ILMN_124019  | Homo sapiens dihydrolipoamide branched chain transacylase E2 (DBT), nuclear gene encoding mitochondrial protein, mRNA.          | -1,42 |
| 6136 RPL12        | ribosomal protein L12                                                                                                           | -1,42 |
| 91746 YTHDC1      | YTH domain containing 1                                                                                                         | -1,43 |
| 6139 RPL17        | ribosomal protein L17                                                                                                           | -1,43 |
| 441377 ILMN_31681 | PREDICTED: Homo sapiens similar to 40S ribosomal protein S26 (LOC441377), mRNA.                                                 | -1,43 |
| 402251 ILMN_45342 | PREDICTED: Homo sapiens similar to eukaryotic translation elongation factor 1 alpha 2 (LOC402251), mRNA.                        | -1,43 |
| 3184 HNRNPD       | heterogeneous nuclear ribonucleoprotein D (AU-rich element RNA binding protein 1, 37kDa)                                        | -1,43 |
| 168537 GIMAP7     | GTPase, IMAP family member 7                                                                                                    | -1,43 |

|                   |                                                                                          |       |
|-------------------|------------------------------------------------------------------------------------------|-------|
| 7705 ZNF146       | zinc finger protein 146                                                                  | -1,44 |
| 26801 SNORD48     | small nucleolar RNA, C/D box 48                                                          | -1,44 |
| 22828 SCAF8       | SR-related CTD-associated factor 8                                                       | -1,44 |
| 5621 PRNP         | prion protein                                                                            | -1,44 |
| 26059 ERC2        | ELKS/RAB6-interacting/CAST family member 2                                               | -1,44 |
| 6206 RPS12        | ribosomal protein S12                                                                    | -1,45 |
| 81576 CCDC130     | coiled-coil domain containing 130                                                        | -1,45 |
| 6159 RPL29        | ribosomal protein L29                                                                    | -1,46 |
| 1387 CREBBP       | CREB binding protein                                                                     | -1,46 |
| 328 APEX1         | APEX nuclease (multifunctional DNA repair enzyme) 1                                      | -1,46 |
| 7529 YWHAB        | tyrosine 3-monooxygenase/tryptophan 5-monooxygenase activation protein, beta polypeptide | -1,47 |
| 6193 RPS5         | ribosomal protein S5                                                                     | -1,47 |
| 149628 PYHIN1     | pyrin and HIN domain family, member 1                                                    | -1,47 |
| 64981 MRPL34      | mitochondrial ribosomal protein L34                                                      | -1,47 |
| 402057 ILMN_40648 | Homo sapiens similar to 40S ribosomal protein S17 (LOC402057), mRNA.                     | -1,47 |
| 6128 RPL6         | ribosomal protein L6                                                                     | -1,47 |
| 3122 HLA-DRA      | major histocompatibility complex, class II, DR alpha                                     | -1,47 |
| 56616 DIABLO      | diablo, IAP-binding mitochondrial protein                                                | -1,47 |
| 28951 TRIB2       | tribbles homolog 2 (Drosophila)                                                          | -1,48 |
| 5018 OXA1L        | oxidase (cytochrome c) assembly 1-like                                                   | -1,48 |
| 3181 HNRNPA2B1    | heterogeneous nuclear ribonucleoprotein A2/B1                                            | -1,48 |
| 552891 ILMN_29106 | Homo sapiens DNAJC25-GNG10 readthrough (DNAJC25-GNG10), mRNA.                            | -1,48 |
| 81609 SNX27       | sorting nexin family member 27                                                           | -1,49 |
| 6191 RPS4X        | ribosomal protein S4, X-linked                                                           | -1,49 |
| 6176 RPLP1        | ribosomal protein, large, P1                                                             | -1,49 |
| 6136 RPL12        | ribosomal protein L12                                                                    | -1,49 |
| 80223 RAB11FIP1   | RAB11 family interacting protein 1 (class I)                                             | -1,49 |
| 5777 PTPN6        | protein tyrosine phosphatase, non-receptor type 6                                        | -1,49 |
| 650298 ILMN_42423 | PREDICTED: Homo sapiens similar to 40S ribosomal protein S26 (LOC650298), mRNA.          | -1,49 |
| 391656 ILMN_43142 | PREDICTED: Homo sapiens similar to hCG1640454 (LOC391656), mRNA.                         | -1,49 |
| 1933 EEF1B2       | eukaryotic translation elongation factor 1 beta 2                                        | -1,49 |
| 8751 ADAM15       | ADAM metallopeptidase domain 15                                                          | -1,49 |
| 84619 ZGPAT       | zinc finger, CCCH-type with G patch domain                                               | -1,5  |

|                    |                                                                                                                         |       |
|--------------------|-------------------------------------------------------------------------------------------------------------------------|-------|
| 7454 WAS           | Wiskott-Aldrich syndrome (eczema-thrombocytopenia)                                                                      | -1,5  |
| 6208 RPS14         | ribosomal protein S14                                                                                                   | -1,5  |
| 9991 ROD1          | ROD1 regulator of differentiation 1 (S. pombe)                                                                          | -1,5  |
| 10608 MXD4         | MAX dimerization protein 4                                                                                              | -1,5  |
| 4050 LTB           | lymphotoxin beta (TNF superfamily, member 3)                                                                            | -1,5  |
| 651894 ILMN_34885  | PREDICTED: Homo sapiens similar to ribosomal protein S12 (LOC651894), mRNA.                                             | -1,5  |
| 6128 RPL6          | ribosomal protein L6                                                                                                    | -1,5  |
| 284821 ILMN_43560  | PREDICTED: Homo sapiens similar to ribosomal protein L13a (LOC284821), mRNA.                                            | -1,5  |
| 6231 RPS26         | ribosomal protein S26                                                                                                   | -1,51 |
| 441246 ILMN_31934  | PREDICTED: Homo sapiens similar to 60S ribosomal protein L35, transcript variant 1 (LOC441246), mRNA.                   | -1,51 |
| 3117 ILMN_41173    | PREDICTED: Homo sapiens major histocompatibility complex, class II, DQ alpha 1, transcript variant 10 (HLA-DQA1), mRNA. | -1,51 |
| 10694 CCT8         | chaperonin containing TCP1, subunit 8 (theta)                                                                           | -1,51 |
| 23420 ILMN_1736    | Homo sapiens NODAL modulator 1 (NOMO1), mRNA.                                                                           | -1,53 |
| 4170 MCL1          | myeloid cell leukemia sequence 1 (BCL2-related)                                                                         | -1,53 |
| 1936 EEF1D         | eukaryotic translation elongation factor 1 delta (guanine nucleotide exchange protein)                                  | -1,53 |
| 6232 RPS27         | ribosomal protein S27                                                                                                   | -1,54 |
| 648000 ILMN_32447  | PREDICTED: Homo sapiens similar to 60S ribosomal protein L7, transcript variant 1 (LOC648000), mRNA.                    | -1,54 |
| 6134 RPL10         | ribosomal protein L10                                                                                                   | -1,54 |
| 3122 HLA-DRA       | major histocompatibility complex, class II, DR alpha                                                                    | -1,54 |
| 972 CD74           | CD74 molecule, major histocompatibility complex, class II invariant chain                                               | -1,54 |
| 6235 RPS29         | ribosomal protein S29                                                                                                   | -1,55 |
| 653773 ILMN_44662  | PREDICTED: Homo sapiens similar to ribosomal protein L31 (LOC653773), mRNA.                                             | -1,55 |
| 54543 TOMM7        | translocase of outer mitochondrial membrane 7 homolog (yeast)                                                           | -1,56 |
| 152007 GLIPR2      | GLI pathogenesis-related 2                                                                                              | -1,56 |
| 112398 EGLN2       | egl nine homolog 2 (C. elegans)                                                                                         | -1,56 |
| 115416 C7orf30     | chromosome 7 open reading frame 30                                                                                      | -1,56 |
| 645 BLVRB          | biliverdin reductase B (flavin reductase (NADPH))                                                                       | -1,56 |
| 6230 RPS25         | ribosomal protein S25                                                                                                   | -1,57 |
| 5547 PRCP          | prolylcarboxypeptidase (angiotensinase C)                                                                               | -1,57 |
| 651149 ILMN_36491  | PREDICTED: Homo sapiens similar to 60S ribosomal protein L3 (L4) (LOC651149), mRNA.                                     | -1,57 |
| 644992 ILMN_33996  | PREDICTED: Homo sapiens hypothetical LOC644992 (LOC644992), mRNA.                                                       | -1,57 |
| 402057 ILMN_181541 | Homo sapiens similar to 40S ribosomal protein S17 (LOC402057), mRNA.                                                    | -1,57 |

|        |            |                                                                                                                                                                                                                           |       |
|--------|------------|---------------------------------------------------------------------------------------------------------------------------------------------------------------------------------------------------------------------------|-------|
| 2734   | GLG1       | golgi glycoprotein 1                                                                                                                                                                                                      | -1,57 |
| 22934  | RPIA       | ribose 5-phosphate isomerase A                                                                                                                                                                                            | -1,58 |
| 9267   | CYTH1      | cytohesin 1                                                                                                                                                                                                               | -1,58 |
| 6159   | RPL29      | ribosomal protein L29                                                                                                                                                                                                     | -1,58 |
| 64333  | ARHGAP9    | Rho GTPase activating protein 9                                                                                                                                                                                           | -1,58 |
| 3921   | ILMN_27800 | Homo sapiens ribosomal protein SA (RPSA), transcript variant 1, mRNA.                                                                                                                                                     | -1,59 |
| 651436 | ILMN_39119 | PREDICTED: Homo sapiens similar to ribosomal protein L9 (LOC651436), mRNA.                                                                                                                                                | -1,59 |
| 8721   | EDF1       | endothelial differentiation-related factor 1                                                                                                                                                                              | -1,59 |
| 8906   | AP1G2      | adaptor-related protein complex 1, gamma 2 subunit                                                                                                                                                                        | -1,59 |
| 6176   | RPLP1      | ribosomal protein, large, P1                                                                                                                                                                                              | -1,6  |
| 3320   | HSP90AA1   | heat shock protein 90kDa alpha (cytosolic), class A member 1                                                                                                                                                              | -1,6  |
| 1915   | EEF1A1     | eukaryotic translation elongation factor 1 alpha 1                                                                                                                                                                        | -1,6  |
| 9219   | MTA2       | metastasis associated 1 family, member 2                                                                                                                                                                                  | -1,61 |
| 644604 | EEF1A1P12  | eukaryotic translation elongation factor 1 alpha 1 pseudogene 12                                                                                                                                                          | -1,61 |
| 647856 | ILMN_42194 | PREDICTED: Homo sapiens similar to 40S ribosomal protein SA (p40) (34/67 kDa laminin receptor) (Colon carcinoma laminin-binding protein) (NEM/1CHD4) (Multidrug resistance-associated protein MGr1-Ag) (LOC647856), mRNA. | -1,61 |
| 643949 | ILMN_35406 | PREDICTED: Homo sapiens similar to 60S acidic ribosomal protein P2 (LOC643949), mRNA.                                                                                                                                     | -1,61 |
| 8837   | ILMN_4321  | Homo sapiens CASP8 and FADD-like apoptosis regulator (CFLAR), mRNA.                                                                                                                                                       | -1,61 |
| 6430   | SRSF5      | serine/arginine-rich splicing factor 5                                                                                                                                                                                    | -1,62 |
| 390876 | ILMN_35719 | PREDICTED: Homo sapiens similar to 60S ribosomal protein L35 (LOC390876), mRNA.                                                                                                                                           | -1,62 |
| 136143 | ILMN_32715 | PREDICTED: Homo sapiens similar to ribosomal protein L18 (LOC136143), mRNA.                                                                                                                                               | -1,62 |
| 6133   | RPL9       | ribosomal protein L9                                                                                                                                                                                                      | -1,63 |
| 6144   | RPL21      | ribosomal protein L21                                                                                                                                                                                                     | -1,63 |
| 644604 | EEF1A1P12  | eukaryotic translation elongation factor 1 alpha 1 pseudogene 12                                                                                                                                                          | -1,63 |
| 6169   | RPL38      | ribosomal protein L38                                                                                                                                                                                                     | -1,64 |
| 650646 | ILMN_46687 | PREDICTED: Homo sapiens similar to 40S ribosomal protein S26 (LOC650646), mRNA.                                                                                                                                           | -1,64 |
| 3326   | HSP90AB1   | heat shock protein 90kDa alpha (cytosolic), class B member 1                                                                                                                                                              | -1,64 |
| 10365  | KLF2       | Kruppel-like factor 2 (lung)                                                                                                                                                                                              | -1,66 |
| 1915   | EEF1A1     | eukaryotic translation elongation factor 1 alpha 1                                                                                                                                                                        | -1,66 |
| 653314 | ILMN_31607 | Homo sapiens similar to ribosomal protein L19 (LOC653314), mRNA.                                                                                                                                                          | -1,67 |
| 3939   | LDHA       | lactate dehydrogenase A                                                                                                                                                                                                   | -1,69 |
| 3128   | HLA-DRB6   | major histocompatibility complex, class II, DR beta 6 (pseudogene)                                                                                                                                                        | -1,69 |
| 400156 | ILMN_27668 | Homo sapiens 40S ribosomal protein S26-like (RPS26L), non-coding RNA.                                                                                                                                                     | -1,7  |

|                    |                                                                                                                                                |       |
|--------------------|------------------------------------------------------------------------------------------------------------------------------------------------|-------|
| 6155 RPL27         | ribosomal protein L27                                                                                                                          | -1,7  |
| 3123 HLA-DRB1      | major histocompatibility complex, class II, DR beta 1                                                                                          | -1,7  |
| 23524 SRRM2        | serine/arginine repetitive matrix 2                                                                                                            | -1,71 |
| 26135 SERBP1       | SERPINE1 mRNA binding protein 1                                                                                                                | -1,71 |
| 5997 RGS2          | regulator of G-protein signaling 2, 24kDa                                                                                                      | -1,71 |
| 57162 PELI1        | pellino homolog 1 (Drosophila)                                                                                                                 | -1,71 |
| 1615 DARS          | aspartyl-tRNA synthetase                                                                                                                       | -1,71 |
| 201895 C4orf34     | chromosome 4 open reading frame 34                                                                                                             | -1,71 |
| 5265 SERPINA1      | serpin peptidase inhibitor, clade A (alpha-1 antiproteinase, antitrypsin), member 1                                                            | -1,72 |
| 5265 SERPINA1      | serpin peptidase inhibitor, clade A (alpha-1 antiproteinase, antitrypsin), member 1                                                            | -1,72 |
| 6188 RPS3          | ribosomal protein S3                                                                                                                           | -1,72 |
| 6141 RPL18         | ribosomal protein L18                                                                                                                          | -1,72 |
| 4714 NDUFB8        | NADH dehydrogenase (ubiquinone) 1 beta subcomplex, 8, 19kDa                                                                                    | -1,72 |
| 3125 HLA-DRB3      | major histocompatibility complex, class II, DR beta 3                                                                                          | -1,72 |
| 6194 RPS6          | ribosomal protein S6                                                                                                                           | -1,73 |
| 401992 ILMN_138791 | PREDICTED: Homo sapiens olfactory receptor, family 2, subfamily T, member 2 (OR2T2), mRNA.                                                     | -1,73 |
| 645737 ILMN_44612  | PREDICTED: Homo sapiens similar to 60S ribosomal protein L7, transcript variant 1 (LOC645737), mRNA.                                           | -1,73 |
| 730316 ILMN_28309  | PREDICTED: Homo sapiens similar to Nuclear envelope pore membrane protein POM 121 (Pore membrane protein of 121 kDa) (P145) (LOC730316), mRNA. | -1,74 |
| 10724 ILMN_11399   | Homo sapiens meningioma expressed antigen 5 (hyaluronidase) (MGEA5), mRNA.                                                                     | -1,75 |
| 390354 ILMN_138133 | PREDICTED: Homo sapiens similar to ribosomal protein L18a; 60S ribosomal protein L18a, transcript variant 36 (LOC390354), misc RNA.            | -1,75 |
| 10288 ILMN_180674  | Homo sapiens leukocyte immunoglobulin-like receptor, subfamily B (with TM and ITIM domains), member 2 (LILRB2), transcript variant 2, mRNA.    | -1,75 |
| 6210 RPS15A        | ribosomal protein S15a                                                                                                                         | -1,77 |
| 346950 ILMN_36919  | PREDICTED: Homo sapiens similar to ribosomal protein L37 (LOC346950), mRNA.                                                                    | -1,77 |
| ILMN_72502         | Homo sapiens cDNA FLJ31407 fis, clone NT2NE2000137                                                                                             | -1,77 |
| 7157 ILMN_11285    | Homo sapiens tumor protein p53 (TP53), mRNA.                                                                                                   | -1,79 |
| 5073 PARN          | poly(A)-specific ribonuclease                                                                                                                  | -1,79 |
| 10236 HNRNPR       | heterogeneous nuclear ribonucleoprotein R                                                                                                      | -1,79 |
| 6207 RPS13         | ribosomal protein S13                                                                                                                          | -1,8  |
| 10424 PGRMC2       | progesterone receptor membrane component 2                                                                                                     | -1,8  |
| 29997 GLTSCR2      | glioma tumor suppressor candidate region gene 2                                                                                                | -1,8  |

|                   |                                                                                                             |       |
|-------------------|-------------------------------------------------------------------------------------------------------------|-------|
| 55571 C2orf29     | chromosome 2 open reading frame 29                                                                          | -1,81 |
| 6233 RPS27A       | ribosomal protein S27a                                                                                      | -1,82 |
| 6232 RPS27        | ribosomal protein S27                                                                                       | -1,82 |
| 654194 ILMN_31988 | PREDICTED: Homo sapiens similar to ribosomal protein S27 (LOC654194), mRNA.                                 | -1,82 |
| 10146 G3BP1       | GTPase activating protein (SH3 domain) binding protein 1                                                    | -1,82 |
| 6235 RPS29        | ribosomal protein S29                                                                                       | -1,83 |
| 23163 GGA3        | golgi-associated, gamma adaptin ear containing, ARF binding protein 3                                       | -1,83 |
| 972 CD74          | CD74 molecule, major histocompatibility complex, class II invariant chain                                   | -1,83 |
| 6152 RPL24        | ribosomal protein L24                                                                                       | -1,84 |
| 440733 ILMN_38430 | PREDICTED: Homo sapiens similar to 40S ribosomal protein S15 (RIG protein) (LOC440733), mRNA.               | -1,84 |
| ILMN_111893       | full-length cDNA clone CS0DI056YK21 of Placenta Cot 25-normalized of Homo sapiens (human)                   | -1,85 |
| 728973 ILMN_38370 | PREDICTED: Homo sapiens similar to 40S ribosomal protein S7 (S8) (LOC728973), mRNA.                         | -1,87 |
| 3184 HNRNPD       | heterogeneous nuclear ribonucleoprotein D (AU-rich element RNA binding protein 1, 37kDa)                    | -1,87 |
| 6191 RPS4X        | ribosomal protein S4, X-linked                                                                              | -1,88 |
| 6209 RPS15        | ribosomal protein S15                                                                                       | -1,88 |
| 3420 IDH3B        | isocitrate dehydrogenase 3 (NAD+) beta                                                                      | -1,88 |
| 2799 GNS          | glucosamine (N-acetyl)-6-sulfatase                                                                          | -1,88 |
| 27430 ILMN_18923  | Homo sapiens methionine adenosyltransferase II, beta (MAT2B), transcript variant 1, mRNA.                   | -1,89 |
| 23019 CNOT1       | CCR4-NOT transcription complex, subunit 1                                                                   | -1,89 |
| 64115 ILMN_174163 | Homo sapiens chromosome 10 open reading frame 54 (C10orf54), mRNA.                                          | -1,89 |
| 50856 ILMN_8463   | Homo sapiens C-type lectin domain family 4, member A (CLEC4A), transcript variant 4, mRNA.                  | -1,9  |
| 6722 ILMN_22299   | Homo sapiens serum response factor (c-fos serum response element-binding transcription factor) (SRF), mRNA. | -1,91 |
| 2113 ETS1         | v-ets erythroblastosis virus E26 oncogene homolog 1 (avian)                                                 | -1,91 |
| 1974 EIF4A2       | eukaryotic translation initiation factor 4A2                                                                | -1,91 |
| 1937 EEF1G        | eukaryotic translation elongation factor 1 gamma                                                            | -1,92 |
| 648343 ILMN_42525 | PREDICTED: Homo sapiens similar to protein phosphatase 1 regulatory subunit 14B (LOC648343), mRNA.          | -1,92 |
| 6143 RPL19        | ribosomal protein L19                                                                                       | -1,94 |
| 1654 DDX3X        | DEAD (Asp-Glu-Ala-Asp) box polypeptide 3, X-linked                                                          | -1,94 |
| 6156 RPL30        | ribosomal protein L30                                                                                       | -1,95 |
| 25832 NBPF14      | neuroblastoma breakpoint family, member 14                                                                  | -1,95 |
| 9516 LITAF        | lipopolysaccharide-induced TNF factor                                                                       | -1,97 |
| 3646 EIF3E        | eukaryotic translation initiation factor 3, subunit E                                                       | -1,97 |
| 6218 RPS17        | ribosomal protein S17                                                                                       | -1,99 |



|                   |                                                                                                                                                                                                                                                 |       |
|-------------------|-------------------------------------------------------------------------------------------------------------------------------------------------------------------------------------------------------------------------------------------------|-------|
| 643284 ILMN_40380 | PREDICTED: Homo sapiens similar to 40S ribosomal protein S29 (LOC643284), mRNA.                                                                                                                                                                 | -1,99 |
| 389672 ILMN_35589 | PREDICTED: Homo sapiens similar to 40S ribosomal protein SA (p40) (34/67 kDa laminin receptor) (Colon carcinoma laminin-binding protein) (NEM/1CHD4) (Multidrug resistance-associated protein MGr1-Ag), transcript variant 3 (LOC389672), mRNA. | -2    |
| 27335 EIF3K       | eukaryotic translation initiation factor 3, subunit K                                                                                                                                                                                           | -2    |
| 6165 RPL35A       | ribosomal protein L35a                                                                                                                                                                                                                          | -2,01 |
| 647361 ILMN_37525 | PREDICTED: Homo sapiens similar to 40S ribosomal protein S29 (LOC647361), mRNA.                                                                                                                                                                 | -2,01 |
| 1350 COX7C        | cytochrome c oxidase subunit VIIc                                                                                                                                                                                                               | -2,02 |
| 6142 RPL18A       | ribosomal protein L18a                                                                                                                                                                                                                          | -2,03 |
| 401019 ILMN_35511 | PREDICTED: Homo sapiens similar to 40S ribosomal protein S15 (RIG protein), transcript variant 3 (LOC401019), mRNA.                                                                                                                             | -2,04 |
| 6160 RPL31        | ribosomal protein L31                                                                                                                                                                                                                           | -2,08 |
| 2219 FCN1         | ficolin (collagen/fibrinogen domain containing) 1                                                                                                                                                                                               | -2,09 |
| 6235 RPS29        | ribosomal protein S29                                                                                                                                                                                                                           | -2,1  |
| 6152 RPL24        | ribosomal protein L24                                                                                                                                                                                                                           | -2,11 |
| 6142 RPL18A       | ribosomal protein L18a                                                                                                                                                                                                                          | -2,11 |
| 651202 ILMN_45225 | PREDICTED: Homo sapiens similar to large subunit ribosomal protein L36a (LOC651202), mRNA.                                                                                                                                                      | -2,13 |
| 3550 IK           | IK cytokine, down-regulator of HLA II                                                                                                                                                                                                           | -2,13 |
| 8364 HIST1H4C     | histone cluster 1, H4c                                                                                                                                                                                                                          | -2,14 |
| 6142 RPL18A       | ribosomal protein L18a                                                                                                                                                                                                                          | -2,16 |
| 353514 LILRA5     | leukocyte immunoglobulin-like receptor, subfamily A (with TM domain), member 5                                                                                                                                                                  | -2,17 |
| 125144 ILMN_6167  | Homo sapiens chromosome 17 open reading frame 45 (C17orf45), mRNA.                                                                                                                                                                              | -2,17 |
| 1937 EEF1G        | eukaryotic translation elongation factor 1 gamma                                                                                                                                                                                                | -2,18 |
| 79026 AHNAK       | AHNAK nucleoprotein                                                                                                                                                                                                                             | -2,19 |
| 652624 ILMN_46806 | PREDICTED: Homo sapiens similar to 40S ribosomal protein SA (p40) (34/67 kDa laminin receptor) (LOC652624), mRNA.                                                                                                                               | -2,21 |
| 6122 RPL3         | ribosomal protein L3                                                                                                                                                                                                                            | -2,22 |
| 4069 LYZ          | lysozyme                                                                                                                                                                                                                                        | -2,22 |
| 79081 C11orf48    | chromosome 11 open reading frame 48                                                                                                                                                                                                             | -2,23 |
| 6209 RPS15        | ribosomal protein S15                                                                                                                                                                                                                           | -2,26 |
| 6217 RPS16        | ribosomal protein S16                                                                                                                                                                                                                           | -2,26 |
| 11180 WDR6        | WD repeat domain 6                                                                                                                                                                                                                              | -2,28 |
| 440737 ILMN_39347 | PREDICTED: Homo sapiens similar to 60S ribosomal protein L35 (LOC440737), mRNA.                                                                                                                                                                 | -2,28 |



|                   |                                                                                                                                                                                                                                                 |       |
|-------------------|-------------------------------------------------------------------------------------------------------------------------------------------------------------------------------------------------------------------------------------------------|-------|
| 3687 ILMN_7741    | Homo sapiens integrin, alpha X (complement component 3 receptor 4 subunit) (ITGAX), mRNA.                                                                                                                                                       | -2,28 |
| 387867 ILMN_34982 | PREDICTED: Homo sapiens similar to 40S ribosomal protein SA (p40) (34/67 kDa laminin receptor) (Colon carcinoma laminin-binding protein) (NEM/1CHD4) (Multidrug resistance-associated protein MGr1-Ag) (LOC387867), mRNA.                       | -2,3  |
| 9750 ILMN_21545   | Homo sapiens family with sequence similarity 65, member B (FAM65B), transcript variant 2, mRNA.                                                                                                                                                 | -2,3  |
| 388122 ILMN_37996 | PREDICTED: Homo sapiens hypothetical LOC388122 (LOC388122), mRNA.                                                                                                                                                                               | -2,31 |
| 6203 RPS9         | ribosomal protein S9                                                                                                                                                                                                                            | -2,34 |
| 81606 LBH         | limb bud and heart development homolog (mouse)                                                                                                                                                                                                  | -2,35 |
| 648249 ILMN_33635 | PREDICTED: Homo sapiens similar to 40S ribosomal protein SA (p40) (34/67 kDa laminin receptor) (Colon carcinoma laminin-binding protein) (NEM/1CHD4) (Multidrug resistance-associated protein MGr1-Ag), transcript variant 3 (LOC648249), mRNA. | -2,36 |
| 284058 KIAA1267   | KIAA1267                                                                                                                                                                                                                                        | -2,37 |
| 6203 RPS9         | ribosomal protein S9                                                                                                                                                                                                                            | -2,4  |
| 5162 PDHB         | pyruvate dehydrogenase (lipoamide) beta                                                                                                                                                                                                         | -2,43 |
| 11224 RPL35       | ribosomal protein L35                                                                                                                                                                                                                           | -2,48 |
| 6170 RPL39        | ribosomal protein L39                                                                                                                                                                                                                           | -2,55 |
| ILMN_102288       | Human mRNA for T-cell specific protein                                                                                                                                                                                                          | -2,55 |
| 684 BST2          | bone marrow stromal cell antigen 2                                                                                                                                                                                                              | -2,55 |
| 864 RUNX3         | runt-related transcription factor 3                                                                                                                                                                                                             | -2,57 |
| 678 ZFP36L2       | zinc finger protein 36, C3H type-like 2                                                                                                                                                                                                         | -2,76 |
| 6472 SHMT2        | serine hydroxymethyltransferase 2 (mitochondrial)                                                                                                                                                                                               | -2,76 |
| 7297 TYK2         | tyrosine kinase 2                                                                                                                                                                                                                               | -2,86 |
| 4050 LTB          | lymphotoxin beta (TNF superfamily, member 3)                                                                                                                                                                                                    | -3,19 |

Supplementary Table S3: List of deregulated KEGG pathways in serum of cancer patients in comparison to healthy individuals (N<sub>sig</sub> number of significantly changed genes in the pathway; N<sub>path</sub> number of genes in the pathway).

**Supplementary Table S3.**

List of deregulated KEGG pathways in serum of cancer patients in comparison to healthy individuals ( N<sub>sig</sub> number of significantly changed genes in the pathway; N<sub>path</sub> number of genes in the pathway).

| KEGG ID  | KEGG name                                                  | N <sub>sig</sub> | N <sub>path</sub> |
|----------|------------------------------------------------------------|------------------|-------------------|
| hsa04610 | Complement and coagulation cascades                        | 15               | 69                |
| hsa00232 | Caffeine metabolism                                        | 1                | 7                 |
| hsa00983 | Drug metabolism - other enzymes                            | 10               | 52                |
| hsa01100 | Metabolic pathways                                         | 315              | 1131              |
| hsa00380 | Tryptophan metabolism                                      | 10               | 42                |
| hsa00970 | Aminoacyl-tRNA biosynthesis                                | 12               | 63                |
| hsa00250 | Alanine, aspartate and glutamate metabolism                | 5                | 32                |
| hsa00280 | Valine, leucine and isoleucine degradation                 | 10               | 44                |
| hsa00410 | beta-Alanine metabolism                                    | 6                | 22                |
| hsa00640 | Propanoate metabolism                                      | 11               | 32                |
| hsa00650 | Butanoate metabolism                                       | 8                | 30                |
| hsa02010 | ABC transporters                                           | 4                | 44                |
| hsa04975 | Fat digestion and absorption                               | 5                | 46                |
| hsa04142 | Lysosome                                                   | 39               | 121               |
| hsa04012 | ErbB signaling pathway                                     | 33               | 87                |
| hsa04110 | Cell cycle                                                 | 52               | 128               |
| hsa04360 | Axon guidance                                              | 38               | 130               |
| hsa04722 | Neurotrophin signaling pathway                             | 56               | 127               |
| hsa05130 | Pathogenic Escherichia coli infection                      | 38               | 58                |
| hsa05131 | Shigellosis                                                | 32               | 62                |
| hsa05200 | Pathways in cancer                                         | 114              | 327               |
| hsa05220 | Chronic myeloid leukemia                                   | 32               | 73                |
| hsa05416 | Viral myocarditis                                          | 36               | 72                |
| hsa00330 | Arginine and proline metabolism                            | 14               | 54                |
| hsa00340 | Histidine metabolism                                       | 5                | 29                |
| hsa00601 | Glycosphingolipid biosynthesis - lacto and neolacto series | 7                | 26                |
| hsa00071 | Fatty acid metabolism                                      | 11               | 43                |
| hsa01040 | Biosynthesis of unsaturated fatty acids                    | 4                | 21                |
| hsa03320 | PPAR signaling pathway                                     | 14               | 70                |

|          |                                                            |    |     |
|----------|------------------------------------------------------------|----|-----|
| hsa04146 | Peroxisome                                                 | 20 | 79  |
| hsa00061 | Fatty acid biosynthesis                                    | 1  | 6   |
| hsa00620 | Pyruvate metabolism                                        | 18 | 40  |
| hsa04910 | Insulin signaling pathway                                  | 57 | 138 |
| hsa04920 | Adipocytokine signaling pathway                            | 20 | 68  |
| hsa00072 | Synthesis and degradation of ketone bodies                 | 1  | 9   |
| hsa00310 | Lysine degradation                                         | 14 | 44  |
| hsa00630 | Glyoxylate and dicarboxylate metabolism                    | 4  | 18  |
| hsa00900 | Terpenoid backbone biosynthesis                            | 3  | 15  |
| hsa04742 | Taste transduction                                         | 9  | 52  |
| hsa00564 | Glycerophospholipid metabolism                             | 14 | 80  |
| hsa00020 | Citrate cycle (TCA cycle)                                  | 12 | 30  |
| hsa00592 | alpha-Linolenic acid metabolism                            | 1  | 20  |
| hsa00740 | Riboflavin metabolism                                      | 5  | 11  |
| hsa04520 | Adherens junction                                          | 34 | 73  |
| hsa04380 | Osteoclast differentiation                                 | 52 | 128 |
| hsa05323 | Rheumatoid arthritis                                       | 32 | 92  |
| hsa04270 | Vascular smooth muscle contraction                         | 41 | 116 |
| hsa04145 | Phagosome                                                  | 69 | 156 |
| hsa04510 | Focal adhesion                                             | 70 | 200 |
| hsa04530 | Tight junction                                             | 50 | 133 |
| hsa04670 | Leukocyte transendothelial migration                       | 45 | 117 |
| hsa04810 | Regulation of actin cytoskeleton                           | 88 | 214 |
| hsa04971 | Gastric acid secretion                                     | 28 | 74  |
| hsa05100 | Bacterial invasion of epithelial cells                     | 34 | 71  |
| hsa05110 | Vibrio cholerae infection                                  | 26 | 54  |
| hsa05410 | Hypertrophic cardiomyopathy (HCM)                          | 22 | 83  |
| hsa05412 | Arrhythmogenic right ventricular cardiomyopathy (ARVC)     | 21 | 74  |
| hsa05414 | Dilated cardiomyopathy                                     | 24 | 90  |
| hsa04260 | Cardiac muscle contraction                                 | 28 | 77  |
| hsa05146 | Amoebiasis                                                 | 24 | 106 |
| hsa05322 | Systemic lupus erythematosus                               | 49 | 138 |
| hsa04060 | Cytokine-cytokine receptor interaction                     | 50 | 265 |
| hsa04350 | TGF-beta signaling pathway                                 | 27 | 85  |
| hsa00230 | Purine metabolism                                          | 56 | 162 |
| hsa05340 | Primary immunodeficiency                                   | 11 | 35  |
| hsa05010 | Alzheimer's disease                                        | 71 | 168 |
| hsa05120 | Epithelial cell signaling in Helicobacter pylori infection | 30 | 68  |
| hsa04623 | Cytosolic DNA-sensing pathway                              | 11 | 56  |
| hsa04020 | Calcium signaling pathway                                  | 40 | 177 |
| hsa04062 | Chemokine signaling pathway                                | 64 | 189 |
| hsa04114 | Oocyte meiosis                                             | 48 | 114 |
| hsa04540 | Gap junction                                               | 36 | 90  |
| hsa04720 | Long-term potentiation                                     | 27 | 70  |

|          |                                              |    |     |
|----------|----------------------------------------------|----|-----|
| hsa04912 | GnRH signaling pathway                       | 33 | 101 |
| hsa04914 | Progesterone-mediated oocyte maturation      | 35 | 87  |
| hsa04916 | Melanogenesis                                | 33 | 101 |
| hsa04970 | Salivary secretion                           | 26 | 89  |
| hsa04972 | Pancreatic secretion                         | 28 | 101 |
| hsa04976 | Bile secretion                               | 19 | 71  |
| hsa05142 | Chagas disease (American trypanosomiasis)    | 32 | 104 |
| hsa04740 | Olfactory transduction                       | 45 | 388 |
| hsa04962 | Vasopressin-regulated water reabsorption     | 18 | 44  |
| hsa04080 | Neuroactive ligand-receptor interaction      | 37 | 272 |
| hsa00010 | Glycolysis / Gluconeogenesis                 | 30 | 65  |
| hsa00350 | Tyrosine metabolism                          | 6  | 41  |
| hsa00830 | Retinol metabolism                           | 12 | 64  |
| hsa00980 | Metabolism of xenobiotics by cytochrome P450 | 16 | 71  |
| hsa00982 | Drug metabolism - cytochrome P450            | 14 | 73  |
| hsa03410 | Base excision repair                         | 12 | 34  |
| hsa04144 | Endocytosis                                  | 76 | 203 |
| hsa05016 | Huntington's disease                         | 72 | 183 |
| hsa00511 | Other glycan degradation                     | 1  | 17  |
| hsa00500 | Starch and sucrose metabolism                | 16 | 54  |
| hsa04330 | Notch signaling pathway                      | 12 | 47  |
| hsa04614 | Renin-angiotensin system                     | 4  | 17  |
| hsa00260 | Glycine, serine and threonine metabolism     | 5  | 32  |
| hsa00270 | Cysteine and methionine metabolism           | 12 | 36  |
| hsa04010 | MAPK signaling pathway                       | 95 | 268 |
| hsa04150 | mTOR signaling pathway                       | 20 | 52  |
| hsa04210 | Apoptosis                                    | 28 | 89  |
| hsa04370 | VEGF signaling pathway                       | 30 | 76  |
| hsa04620 | Toll-like receptor signaling pathway         | 30 | 102 |
| hsa04630 | Jak-STAT signaling pathway                   | 51 | 155 |
| hsa04660 | T cell receptor signaling pathway            | 42 | 108 |
| hsa04662 | B cell receptor signaling pathway            | 33 | 75  |
| hsa04664 | Fc epsilon RI signaling pathway              | 30 | 79  |
| hsa04666 | Fc gamma R-mediated phagocytosis             | 41 | 95  |
| hsa04973 | Carbohydrate digestion and absorption        | 16 | 44  |
| hsa05145 | Toxoplasmosis                                | 44 | 133 |
| hsa05160 | Hepatitis C                                  | 46 | 135 |
| hsa05210 | Colorectal cancer                            | 27 | 62  |
| hsa05211 | Renal cell carcinoma                         | 31 | 70  |
| hsa05212 | Pancreatic cancer                            | 29 | 70  |
| hsa05213 | Endometrial cancer                           | 26 | 52  |
| hsa05214 | Glioma                                       | 29 | 65  |
| hsa05215 | Prostate cancer                              | 40 | 89  |
| hsa05218 | Melanoma                                     | 23 | 71  |

|          |                                             |    |     |
|----------|---------------------------------------------|----|-----|
| hsa05221 | Acute myeloid leukemia                      | 25 | 58  |
| hsa05222 | Small cell lung cancer                      | 29 | 85  |
| hsa05223 | Non-small cell lung cancer                  | 26 | 54  |
| hsa00860 | Porphyrin and chlorophyll metabolism        | 12 | 43  |
| hsa04514 | Cell adhesion molecules (CAMs)              | 42 | 136 |
| hsa00040 | Pentose and glucuronate interconversions    | 8  | 32  |
| hsa00053 | Ascorbate and aldarate metabolism           | 8  | 26  |
| hsa00561 | Glycerolipid metabolism                     | 12 | 50  |
| hsa00360 | Phenylalanine metabolism                    | 2  | 17  |
| hsa00030 | Pentose phosphate pathway                   | 13 | 27  |
| hsa00051 | Fructose and mannose metabolism             | 16 | 36  |
| hsa00052 | Galactose metabolism                        | 9  | 27  |
| hsa00590 | Arachidonic acid metabolism                 | 13 | 59  |
| hsa00591 | Linoleic acid metabolism                    | 4  | 30  |
| hsa04141 | Protein processing in endoplasmic reticulum | 61 | 168 |
| hsa00670 | One carbon pool by folate                   | 4  | 18  |
| hsa00910 | Nitrogen metabolism                         | 3  | 23  |
| hsa00480 | Glutathione metabolism                      | 20 | 50  |
| hsa04640 | Hematopoietic cell lineage                  | 28 | 88  |
| hsa05012 | Parkinson's disease                         | 60 | 130 |
| hsa00760 | Nicotinate and nicotinamide metabolism      | 11 | 24  |
| hsa04115 | p53 signaling pathway                       | 28 | 69  |
| hsa05014 | Amyotrophic lateral sclerosis (ALS)         | 19 | 54  |
| hsa00240 | Pyrimidine metabolism                       | 33 | 99  |
| hsa04310 | Wnt signaling pathway                       | 52 | 151 |
| hsa05217 | Basal cell carcinoma                        | 13 | 55  |
| hsa04120 | Ubiquitin mediated proteolysis              | 60 | 139 |
| hsa04621 | NOD-like receptor signaling pathway         | 19 | 59  |
| hsa04977 | Vitamin digestion and absorption            | 5  | 24  |
| hsa05143 | African trypanosomiasis                     | 9  | 35  |
| hsa04650 | Natural killer cell mediated cytotoxicity   | 54 | 136 |
| hsa04940 | Type I diabetes mellitus                    | 19 | 45  |
| hsa05320 | Autoimmune thyroid disease                  | 19 | 54  |
| hsa05330 | Allograft rejection                         | 17 | 39  |
| hsa05332 | Graft-versus-host disease                   | 21 | 43  |
| hsa04964 | Proximal tubule bicarbonate reclamation     | 8  | 23  |
| hsa04730 | Long-term depression                        | 25 | 70  |
| hsa05219 | Bladder cancer                              | 17 | 42  |
| hsa04710 | Circadian rhythm - mammal                   | 5  | 23  |
| hsa04744 | Phototransduction                           | 6  | 29  |
| hsa00600 | Sphingolipid metabolism                     | 13 | 40  |
| hsa00531 | Glycosaminoglycan degradation               | 5  | 19  |
| hsa00140 | Steroid hormone biosynthesis                | 9  | 57  |
| hsa04960 | Aldosterone-regulated sodium reabsorption   | 19 | 42  |

|          |                                                  |    |     |
|----------|--------------------------------------------------|----|-----|
| hsa04974 | Protein digestion and absorption                 | 19 | 81  |
| hsa00190 | Oxidative phosphorylation                        | 62 | 132 |
| hsa04966 | Collecting duct acid secretion                   | 12 | 27  |
| hsa00300 | Lysine biosynthesis                              | 1  | 3   |
| hsa04612 | Antigen processing and presentation              | 39 | 78  |
| hsa00120 | Primary bile acid biosynthesis                   | 4  | 16  |
| hsa00430 | Taurine and hypotaurine metabolism               | 1  | 10  |
| hsa05020 | Prion diseases                                   | 12 | 36  |
| hsa00290 | Valine, leucine and isoleucine biosynthesis      | 3  | 11  |
| hsa00770 | Pantothenate and CoA biosynthesis                | 6  | 16  |
| hsa05216 | Thyroid cancer                                   | 16 | 29  |
| hsa04672 | Intestinal immune network for IgA production     | 12 | 49  |
| hsa05150 | Staphylococcus aureus infection                  | 18 | 56  |
| hsa03440 | Homologous recombination                         | 10 | 28  |
| hsa04340 | Hedgehog signaling pathway                       | 14 | 56  |
| hsa03020 | RNA polymerase                                   | 8  | 29  |
| hsa04130 | SNARE interactions in vesicular transport        | 17 | 36  |
| hsa00780 | Biotin metabolism                                | 1  | 2   |
| hsa03018 | RNA degradation                                  | 35 | 71  |
| hsa05140 | Leishmaniasis                                    | 33 | 73  |
| hsa04930 | Type II diabetes mellitus                        | 13 | 48  |
| hsa04070 | Phosphatidylinositol signaling system            | 17 | 78  |
| hsa04622 | RIG-I-like receptor signaling pathway            | 14 | 71  |
| hsa00450 | Selenocompound metabolism                        | 5  | 17  |
| hsa03420 | Nucleotide excision repair                       | 16 | 45  |
| hsa04512 | ECM-receptor interaction                         | 17 | 85  |
| hsa05144 | Malaria                                          | 9  | 51  |
| hsa05310 | Asthma                                           | 11 | 31  |
| hsa03040 | Spliceosome                                      | 68 | 128 |
| hsa00100 | Steroid biosynthesis                             | 5  | 19  |
| hsa00520 | Amino sugar and nucleotide sugar metabolism      | 15 | 48  |
| hsa03013 | RNA transport                                    | 66 | 152 |
| hsa03008 | Ribosome biogenesis in eukaryotes                | 29 | 81  |
| hsa03015 | mRNA surveillance pathway                        | 34 | 83  |
| hsa00510 | N-Glycan biosynthesis                            | 10 | 49  |
| hsa03030 | DNA replication                                  | 16 | 36  |
| hsa03450 | Non-homologous end-joining                       | 4  | 14  |
| hsa00062 | Fatty acid elongation in mitochondria            | 2  | 8   |
| hsa04320 | Dorso-ventral axis formation                     | 10 | 25  |
| hsa00534 | Glycosaminoglycan biosynthesis - heparan sulfate | 2  | 26  |
| hsa03010 | Ribosome                                         | 70 | 92  |
| hsa04950 | Maturity onset diabetes of the young             | 3  | 25  |
| hsa00603 | Glycosphingolipid biosynthesis - globo series    | 3  | 14  |
| hsa00514 | Other types of O-glycan biosynthesis             | 9  | 46  |

|          |                                                       |    |    |
|----------|-------------------------------------------------------|----|----|
| hsa00533 | Glycosaminoglycan biosynthesis - keratan sulfate      | 4  | 15 |
| hsa00604 | Glycosphingolipid biosynthesis - ganglio series       | 1  | 15 |
| hsa00512 | Mucin type O-Glycan biosynthesis                      | 5  | 30 |
| hsa00524 | Butirosin and neomycin biosynthesis                   | 2  | 5  |
| hsa00460 | Cyanoamino acid metabolism                            | 2  | 7  |
| hsa00471 | D-Glutamine and D-glutamate metabolism                | 1  | 4  |
| hsa00400 | Phenylalanine, tyrosine and tryptophan biosynthesis   | 1  | 5  |
| hsa00563 | Glycosylphosphatidylinositol(GPI)-anchor biosynthesis | 3  | 25 |
| hsa03430 | Mismatch repair                                       | 9  | 23 |
| hsa03022 | Basal transcription factors                           | 16 | 37 |
| hsa03060 | Protein export                                        | 11 | 23 |
| hsa04140 | Regulation of autophagy                               | 7  | 34 |
| hsa03050 | Proteasome                                            | 28 | 45 |
| hsa00562 | Inositol phosphate metabolism                         | 11 | 57 |
| hsa04122 | Sulfur relay system                                   | 3  | 10 |
| hsa00565 | Ether lipid metabolism                                | 8  | 36 |
| hsa00920 | Sulfur metabolism                                     | 1  | 13 |
| hsa00730 | Thiamine metabolism                                   | 1  | 4  |
| hsa00532 | Glycosaminoglycan biosynthesis - chondroitin sulfate  | 3  | 22 |
| hsa00785 | Lipoic acid metabolism                                | 1  | 3  |
| hsa00790 | Folate biosynthesis                                   | 1  | 11 |
| hsa00750 | Vitamin B6 metabolism                                 | 1  | 6  |

Supplementary Table S4: GSEA on GO terms - biological process of serum specimens of cancer patients in comparison to healthy individuals shows significant deregulation in translational processes, ribosomal biogenesis, viral transcription, negative regulation of DNA damage response - signal transduction by p53 class mediator, induction of apoptosis (showed only GO terms with p-value < 0.05).

**Supplementary Table S4.**

GSEA on GO terms - biological process of serum specimens of cancer patients in comparison to healthy individuals shows significant deregulation in translational processes, ribosomal biogenesis, viral transcription, negative regulation of DNA damage response - signal transduction by p53 class mediator, induction of apoptosis (showed only GO terms with p-value < 0.05).

| GO ID      | GO term                                                             | p-value  |
|------------|---------------------------------------------------------------------|----------|
| GO:0006414 | translational elongation                                            | 1,20E-63 |
| GO:0006415 | translational termination                                           | 1,50E-62 |
| GO:0006613 | cotranslational protein targeting to membrane                       | 1,90E-57 |
| GO:0006614 | SRP-dependent cotranslational protein targeting to membrane         | 1,90E-57 |
| GO:0045047 | protein targeting to ER                                             | 8,40E-57 |
| GO:0072599 | establishment of protein localization to endoplasmic reticulum      | 8,40E-57 |
| GO:0043624 | cellular protein complex disassembly                                | 2,30E-54 |
| GO:0070972 | protein localization to endoplasmic reticulum                       | 2,30E-54 |
| GO:0043241 | protein complex disassembly                                         | 7,80E-54 |
| GO:0000184 | nuclear-transcribed mRNA catabolic process, nonsense-mediated decay | 9,40E-54 |
| GO:0006402 | mRNA catabolic process                                              | 4,20E-52 |
| GO:0034623 | cellular macromolecular complex disassembly                         | 1,00E-51 |
| GO:0000956 | nuclear-transcribed mRNA catabolic process                          | 2,10E-51 |
| GO:0032984 | macromolecular complex disassembly                                  | 2,80E-51 |
| GO:0006612 | protein targeting to membrane                                       | 7,20E-51 |
| GO:0006401 | RNA catabolic process                                               | 1,70E-50 |
| GO:0006413 | translational initiation                                            | 3,20E-50 |
| GO:0019080 | viral genome expression                                             | 4,30E-50 |
| GO:0019083 | viral transcription                                                 | 4,30E-50 |
| GO:0072594 | establishment of protein localization to organelle                  | 1,70E-44 |
| GO:0016071 | mRNA metabolic process                                              | 2,20E-39 |
| GO:0071845 | cellular component disassembly at cellular level                    | 2,10E-38 |
| GO:0022411 | cellular component disassembly                                      | 2,80E-38 |
| GO:0019058 | viral infectious cycle                                              | 4,00E-37 |
| GO:0022415 | viral reproductive process                                          | 2,00E-36 |
| GO:0006412 | translation                                                         | 1,70E-32 |
| GO:0071822 | protein complex subunit organization                                | 1,50E-28 |
| GO:0034621 | cellular macromolecular complex subunit organization                | 1,70E-28 |



|            |                                                                 |          |
|------------|-----------------------------------------------------------------|----------|
| GO:0048610 | cellular process involved in reproduction                       | 4,10E-28 |
| GO:0044265 | cellular macromolecule catabolic process                        | 4,70E-27 |
| GO:0016032 | viral reproduction                                              | 1,00E-26 |
| GO:0006605 | protein targeting                                               | 5,00E-26 |
| GO:0009057 | macromolecule catabolic process                                 | 1,70E-25 |
| GO:0033365 | protein localization to organelle                               | 1,80E-25 |
| GO:0043933 | macromolecular complex subunit organization                     | 8,40E-25 |
| GO:0006886 | intracellular protein transport                                 | 3,40E-23 |
| GO:0070727 | cellular macromolecule localization                             | 7,10E-20 |
| GO:0034613 | cellular protein localization                                   | 8,30E-20 |
| GO:0022414 | reproductive process                                            | 2,00E-16 |
| GO:0000003 | reproduction                                                    | 3,80E-16 |
| GO:0015031 | protein transport                                               | 1,10E-15 |
| GO:0044248 | cellular catabolic process                                      | 2,20E-15 |
| GO:0045184 | establishment of protein localization                           | 7,70E-15 |
| GO:0009056 | catabolic process                                               | 3,20E-14 |
| GO:0008104 | protein localization                                            | 5,10E-14 |
| GO:0046907 | intracellular transport                                         | 6,90E-14 |
| GO:0033036 | macromolecule localization                                      | 1,70E-13 |
| GO:0051649 | establishment of localization in cell                           | 7,30E-13 |
| GO:0042274 | ribosomal small subunit biogenesis                              | 1,50E-12 |
| GO:0016072 | rRNA metabolic process                                          | 9,00E-12 |
| GO:0051641 | cellular localization                                           | 1,20E-11 |
| GO:0006364 | rRNA processing                                                 | 1,40E-11 |
| GO:0019538 | protein metabolic process                                       | 5,80E-11 |
| GO:0042254 | ribosome biogenesis                                             | 7,80E-11 |
| GO:0044267 | cellular protein metabolic process                              | 2,30E-10 |
| GO:0006396 | RNA processing                                                  | 3,60E-10 |
| GO:0034470 | ncRNA processing                                                | 5,00E-10 |
| GO:0010467 | gene expression                                                 | 1,50E-09 |
| GO:0016070 | RNA metabolic process                                           | 4,80E-09 |
| GO:0034660 | ncRNA metabolic process                                         | 6,30E-09 |
| GO:0071840 | cellular component organization or biogenesis                   | 1,50E-08 |
| GO:0071843 | cellular component biogenesis at cellular level                 | 1,60E-08 |
| GO:0043170 | macromolecule metabolic process                                 | 1,70E-08 |
| GO:0071841 | cellular component organization or biogenesis at cellular level | 2,20E-08 |
| GO:0022613 | ribonucleoprotein complex biogenesis                            | 3,80E-08 |
| GO:0016043 | cellular component organization                                 | 6,40E-08 |
| GO:0071842 | cellular component organization at cellular level               | 1,20E-07 |
| GO:0090304 | nucleic acid metabolic process                                  | 1,40E-07 |
| GO:0042273 | ribosomal large subunit biogenesis                              | 3,60E-07 |
| GO:0044260 | cellular macromolecule metabolic process                        | 6,30E-07 |
| GO:0000028 | ribosomal small subunit assembly                                | 7,00E-07 |
| GO:0044085 | cellular component biogenesis                                   | 3,90E-06 |
| GO:0006807 | nitrogen compound metabolic process                             | 5,90E-06 |
| GO:0034641 | cellular nitrogen compound metabolic process                    | 6,40E-06 |
| GO:0006139 | nucleobase-containing compound metabolic process                | 1,40E-05 |

|            |                                                                                       |          |
|------------|---------------------------------------------------------------------------------------|----------|
| GO:0051234 | establishment of localization                                                         | 2,30E-05 |
| GO:0032774 | RNA biosynthetic process                                                              | 3,00E-05 |
| GO:0044238 | primary metabolic process                                                             | 4,10E-05 |
| GO:0001775 | cell activation                                                                       | 4,90E-05 |
| GO:0006810 | transport                                                                             | 4,90E-05 |
| GO:0009059 | macromolecule biosynthetic process                                                    | 5,90E-05 |
| GO:0044237 | cellular metabolic process                                                            | 5,90E-05 |
| GO:0007229 | integrin-mediated signaling pathway                                                   | 8,50E-05 |
| GO:0051179 | localization                                                                          | 8,60E-05 |
| GO:0044249 | cellular biosynthetic process                                                         | 0,00013  |
| GO:0006955 | immune response                                                                       | 0,00014  |
| GO:0009058 | biosynthetic process                                                                  | 0,00014  |
| GO:0034645 | cellular macromolecule biosynthetic process                                           | 0,00016  |
| GO:0002376 | immune system process                                                                 | 0,00017  |
| GO:0008152 | metabolic process                                                                     | 0,00019  |
| GO:0006397 | mRNA processing                                                                       | 2,00E-04 |
| GO:0042060 | wound healing                                                                         | 0,00029  |
| GO:0042255 | ribosome assembly                                                                     | 0,00033  |
| GO:0051085 | chaperone mediated protein folding requiring cofactor                                 | 0,00038  |
| GO:0051293 | establishment of spindle localization                                                 | 0,00046  |
| GO:0002576 | platelet degranulation                                                                | 0,00058  |
| GO:0046649 | lymphocyte activation                                                                 | 6,00E-04 |
| GO:0006458 | 'de novo' protein folding                                                             | 0,00073  |
| GO:0030330 | DNA damage response, signal transduction by p53 class mediator                        | 0,00074  |
| GO:0072331 | signal transduction by p53 class mediator                                             | 0,00074  |
| GO:2001021 | negative regulation of response to DNA damage stimulus                                | 0,00075  |
| GO:0042110 | T cell activation                                                                     | 0,00077  |
| GO:0048872 | homeostasis of number of cells                                                        | 0,00088  |
| GO:0007596 | blood coagulation                                                                     | 0,0011   |
| GO:0010942 | positive regulation of cell death                                                     | 0,0011   |
| GO:0007599 | hemostasis                                                                            | 0,0012   |
| GO:0050817 | coagulation                                                                           | 0,0012   |
| GO:0065008 | regulation of biological quality                                                      | 0,0013   |
| GO:0043065 | positive regulation of apoptotic process                                              | 0,0014   |
| GO:0043068 | positive regulation of programmed cell death                                          | 0,0015   |
| GO:0051653 | spindle localization                                                                  | 0,0015   |
| GO:0045321 | leukocyte activation                                                                  | 0,0018   |
| GO:0002468 | dendritic cell antigen processing and presentation                                    | 0,0019   |
| GO:0002604 | regulation of dendritic cell antigen processing and presentation                      | 0,0019   |
| GO:0030593 | neutrophil chemotaxis                                                                 | 0,0019   |
| GO:0031124 | mRNA 3'-end processing                                                                | 0,0019   |
| GO:0000375 | RNA splicing, via transesterification reactions                                       | 0,002    |
| GO:0002456 | T cell mediated immunity                                                              | 0,0021   |
| GO:0042770 | signal transduction in response to DNA damage                                         | 0,0023   |
| GO:0008380 | RNA splicing                                                                          | 0,0024   |
| GO:0043518 | negative regulation of DNA damage response, signal transduction by p53 class mediator | 0,0024   |

|            |                                                                                           |        |
|------------|-------------------------------------------------------------------------------------------|--------|
| GO:0010941 | regulation of cell death                                                                  | 0,0027 |
| GO:0035872 | nucleotide-binding domain, leucine rich repeat containing receptor signaling pathway      | 0,0027 |
| GO:0038032 | termination of G-protein coupled receptor signaling pathway                               | 0,003  |
| GO:0070663 | regulation of leukocyte proliferation                                                     | 0,0032 |
| GO:0043516 | regulation of DNA damage response, signal transduction by p53 class mediator              | 0,0033 |
| GO:0002504 | antigen processing and presentation of peptide or polysaccharide antigen via MHC class II | 0,0034 |
| GO:0001959 | regulation of cytokine-mediated signaling pathway                                         | 0,0035 |
| GO:0031123 | RNA 3'-end processing                                                                     | 0,0036 |
| GO:0065003 | macromolecular complex assembly                                                           | 0,0037 |
| GO:0090022 | regulation of neutrophil chemotaxis                                                       | 0,0037 |
| GO:0006917 | induction of apoptosis                                                                    | 0,0039 |
| GO:0012502 | induction of programmed cell death                                                        | 0,0039 |
| GO:0006915 | apoptotic process                                                                         | 0,004  |
| GO:0022607 | cellular component assembly                                                               | 0,004  |
| GO:0050730 | regulation of peptidyl-tyrosine phosphorylation                                           | 0,004  |
| GO:0000377 | RNA splicing, via transesterification reactions with bulged adenosine as nucleophile      | 0,0042 |
| GO:0000398 | nuclear mRNA splicing, via spliceosome                                                    | 0,0042 |
| GO:0009611 | response to wounding                                                                      | 0,0042 |
| GO:0042981 | regulation of apoptotic process                                                           | 0,0042 |
| GO:0055072 | iron ion homeostasis                                                                      | 0,0042 |
| GO:0032944 | regulation of mononuclear cell proliferation                                              | 0,0046 |
| GO:0050670 | regulation of lymphocyte proliferation                                                    | 0,0046 |
| GO:0006457 | protein folding                                                                           | 0,0047 |
| GO:0060338 | regulation of type I interferon-mediated signaling pathway                                | 0,0048 |
| GO:0002520 | immune system development                                                                 | 0,0051 |
| GO:0043067 | regulation of programmed cell death                                                       | 0,0052 |
| GO:0034101 | erythrocyte homeostasis                                                                   | 0,0053 |
| GO:0042026 | protein refolding                                                                         | 0,0053 |
| GO:0048144 | fibroblast proliferation                                                                  | 0,0053 |
| GO:0048145 | regulation of fibroblast proliferation                                                    | 0,0053 |
| GO:0019882 | antigen processing and presentation                                                       | 0,0054 |
| GO:0002577 | regulation of antigen processing and presentation                                         | 0,0055 |
| GO:0019886 | antigen processing and presentation of exogenous peptide antigen via MHC class II         | 0,0055 |
| GO:0060547 | negative regulation of necrotic cell death                                                | 0,0055 |
| GO:0090023 | positive regulation of neutrophil chemotaxis                                              | 0,0055 |
| GO:0090303 | positive regulation of wound healing                                                      | 0,0055 |
| GO:0010740 | positive regulation of intracellular protein kinase cascade                               | 0,0056 |
| GO:0009987 | cellular process                                                                          | 0,0061 |
| GO:0051249 | regulation of lymphocyte activation                                                       | 0,0065 |
| GO:0031571 | mitotic cell cycle G1/S transition DNA damage checkpoint                                  | 0,0067 |
| GO:0070661 | leukocyte proliferation                                                                   | 0,0067 |
| GO:0012501 | programmed cell death                                                                     | 0,0068 |

|            |                                                                                               |        |
|------------|-----------------------------------------------------------------------------------------------|--------|
| GO:0002429 | immune response-activating cell surface receptor signaling pathway                            | 0,0069 |
| GO:0000288 | nuclear-transcribed mRNA catabolic process, deadenylation-dependent decay                     | 0,0073 |
| GO:0043487 | regulation of RNA stability                                                                   | 0,0073 |
| GO:0051704 | multi-organism process                                                                        | 0,0073 |
| GO:0050776 | regulation of immune response                                                                 | 0,0074 |
| GO:0050867 | positive regulation of cell activation                                                        | 0,0075 |
| GO:0000132 | establishment of mitotic spindle orientation                                                  | 0,0077 |
| GO:0002579 | positive regulation of antigen processing and presentation                                    | 0,0077 |
| GO:0002606 | positive regulation of dendritic cell antigen processing and presentation                     | 0,0077 |
| GO:0006878 | cellular copper ion homeostasis                                                               | 0,0077 |
| GO:0006880 | intracellular sequestering of iron ion                                                        | 0,0077 |
| GO:0040001 | establishment of mitotic spindle localization                                                 | 0,0077 |
| GO:0045061 | thymic T cell selection                                                                       | 0,0077 |
| GO:0051294 | establishment of spindle orientation                                                          | 0,0077 |
| GO:0006977 | DNA damage response, signal transduction by p53 class mediator resulting in cell cycle arrest | 0,0078 |
| GO:0032943 | mononuclear cell proliferation                                                                | 0,0078 |
| GO:0046651 | lymphocyte proliferation                                                                      | 0,0078 |
| GO:0072395 | signal transduction involved in cell cycle checkpoint                                         | 0,0078 |
| GO:0072401 | signal transduction involved in DNA integrity checkpoint                                      | 0,0078 |
| GO:0072404 | signal transduction involved in G1/S transition checkpoint                                    | 0,0078 |
| GO:0072413 | signal transduction involved in mitotic cell cycle checkpoint                                 | 0,0078 |
| GO:0072422 | signal transduction involved in DNA damage checkpoint                                         | 0,0078 |
| GO:0072431 | signal transduction involved in mitotic cell cycle G1/S transition DNA damage checkpoint      | 0,0078 |
| GO:0072474 | signal transduction involved in mitotic cell cycle G1/S checkpoint                            | 0,0078 |
| GO:0044419 | interspecies interaction between organisms                                                    | 0,0079 |
| GO:0000289 | nuclear-transcribed mRNA poly(A) tail shortening                                              | 0,008  |
| GO:0050851 | antigen receptor-mediated signaling pathway                                                   | 0,008  |
| GO:0050865 | regulation of cell activation                                                                 | 0,0081 |
| GO:0002694 | regulation of leukocyte activation                                                            | 0,0082 |
| GO:0030595 | leukocyte chemotaxis                                                                          | 0,0082 |
| GO:0042100 | B cell proliferation                                                                          | 0,0082 |
| GO:0051084 | 'de novo' posttranslational protein folding                                                   | 0,0082 |
| GO:0002768 | immune response-regulating cell surface receptor signaling pathway                            | 0,0083 |
| GO:0002478 | antigen processing and presentation of exogenous peptide antigen                              | 0,0084 |
| GO:0019884 | antigen processing and presentation of exogenous antigen                                      | 0,0084 |
| GO:0031575 | mitotic cell cycle G1/S transition checkpoint                                                 | 0,0084 |
| GO:0050852 | T cell receptor signaling pathway                                                             | 0,0084 |
| GO:0002696 | positive regulation of leukocyte activation                                                   | 0,0086 |
| GO:0023021 | termination of signal transduction                                                            | 0,0087 |
| GO:0048147 | negative regulation of fibroblast proliferation                                               | 0,0087 |
| GO:0061077 | chaperone-mediated protein folding                                                            | 0,0087 |
| GO:0006826 | iron ion transport                                                                            | 0,0092 |
| GO:0018212 | peptidyl-tyrosine modification                                                                | 0,0092 |

|            |                                                                                |        |
|------------|--------------------------------------------------------------------------------|--------|
| GO:0030010 | establishment of cell polarity                                                 | 0,0092 |
| GO:0040017 | positive regulation of locomotion                                              | 0,0097 |
| GO:0050870 | positive regulation of T cell activation                                       | 0,0097 |
| GO:0051272 | positive regulation of cellular component movement                             | 0,0098 |
| GO:0030097 | hemopoiesis                                                                    | 0,01   |
| GO:0050731 | positive regulation of peptidyl-tyrosine phosphorylation                       | 0,01   |
| GO:0071158 | positive regulation of cell cycle arrest                                       | 0,01   |
| GO:0002449 | lymphocyte mediated immunity                                                   | 0,011  |
| GO:0006935 | chemotaxis                                                                     | 0,011  |
| GO:0018108 | peptidyl-tyrosine phosphorylation                                              | 0,011  |
| GO:0042330 | taxis                                                                          | 0,011  |
| GO:0048523 | negative regulation of cellular process                                        | 0,011  |
| GO:0050863 | regulation of T cell activation                                                | 0,011  |
| GO:0043383 | negative T cell selection                                                      | 0,012  |
| GO:0045060 | negative thymic T cell selection                                               | 0,012  |
| GO:0050878 | regulation of body fluid levels                                                | 0,012  |
| GO:0002764 | immune response-regulating signaling pathway                                   | 0,013  |
| GO:0006767 | water-soluble vitamin metabolic process                                        | 0,013  |
| GO:0007159 | leukocyte cell-cell adhesion                                                   | 0,013  |
| GO:0007416 | synapse assembly                                                               | 0,013  |
| GO:0034622 | cellular macromolecular complex assembly                                       | 0,013  |
| GO:0051439 | regulation of ubiquitin-protein ligase activity involved in mitotic cell cycle | 0,013  |
| GO:0001913 | T cell mediated cytotoxicity                                                   | 0,014  |
| GO:0002544 | chronic inflammatory response                                                  | 0,014  |
| GO:0007163 | establishment or maintenance of cell polarity                                  | 0,014  |
| GO:0007632 | visual behavior                                                                | 0,014  |
| GO:0008088 | axon cargo transport                                                           | 0,014  |
| GO:0010611 | regulation of cardiac muscle hypertrophy                                       | 0,014  |
| GO:0010939 | regulation of necrotic cell death                                              | 0,014  |
| GO:0014743 | regulation of muscle hypertrophy                                               | 0,014  |
| GO:0043502 | regulation of muscle adaptation                                                | 0,014  |
| GO:0045058 | T cell selection                                                               | 0,014  |
| GO:0048534 | hemopoietic or lymphoid organ development                                      | 0,014  |
| GO:0050803 | regulation of synapse structure and activity                                   | 0,014  |
| GO:0051325 | interphase                                                                     | 0,014  |
| GO:0051897 | positive regulation of protein kinase B signaling cascade                      | 0,014  |
| GO:0002757 | immune response-activating signal transduction                                 | 0,015  |
| GO:0008219 | cell death                                                                     | 0,015  |
| GO:0030335 | positive regulation of cell migration                                          | 0,015  |
| GO:0071779 | G1/S transition checkpoint                                                     | 0,015  |
| GO:2000147 | positive regulation of cell motility                                           | 0,015  |
| GO:0030168 | platelet activation                                                            | 0,016  |
| GO:0043488 | regulation of mRNA stability                                                   | 0,016  |
| GO:0016265 | death                                                                          | 0,017  |
| GO:0070664 | negative regulation of leukocyte proliferation                                 | 0,017  |
| GO:0008277 | regulation of G-protein coupled receptor protein signaling pathway             | 0,018  |

|            |                                                                                                |       |
|------------|------------------------------------------------------------------------------------------------|-------|
| GO:0051251 | positive regulation of lymphocyte activation                                                   | 0,018 |
| GO:0060759 | regulation of response to cytokine stimulus                                                    | 0,018 |
| GO:0006026 | aminoglycan catabolic process                                                                  | 0,019 |
| GO:0006461 | protein complex assembly                                                                       | 0,019 |
| GO:0007183 | SMAD protein complex assembly                                                                  | 0,019 |
| GO:0043249 | erythrocyte maturation                                                                         | 0,019 |
| GO:0051168 | nuclear export                                                                                 | 0,019 |
| GO:0055070 | copper ion homeostasis                                                                         | 0,019 |
| GO:0061001 | regulation of dendritic spine morphogenesis                                                    | 0,019 |
| GO:0030890 | positive regulation of B cell proliferation                                                    | 0,02  |
| GO:0043500 | muscle adaptation                                                                              | 0,02  |
| GO:0045429 | positive regulation of nitric oxide biosynthetic process                                       | 0,02  |
| GO:0070271 | protein complex biogenesis                                                                     | 0,02  |
| GO:2000045 | regulation of G1/S transition of mitotic cell cycle                                            | 0,02  |
| GO:0006887 | exocytosis                                                                                     | 0,021 |
| GO:0002690 | positive regulation of leukocyte chemotaxis                                                    | 0,022 |
| GO:0050854 | regulation of antigen receptor-mediated signaling pathway                                      | 0,022 |
| GO:0050921 | positive regulation of chemotaxis                                                              | 0,022 |
| GO:0051329 | interphase of mitotic cell cycle                                                               | 0,022 |
| GO:0051437 | positive regulation of ubiquitin-protein ligase activity involved in mitotic cell cycle        | 0,022 |
| GO:0001516 | prostaglandin biosynthetic process                                                             | 0,023 |
| GO:0002495 | antigen processing and presentation of peptide antigen via MHC class II                        | 0,023 |
| GO:0007176 | regulation of epidermal growth factor-activated receptor activity                              | 0,023 |
| GO:0008306 | associative learning                                                                           | 0,023 |
| GO:0010613 | positive regulation of cardiac muscle hypertrophy                                              | 0,023 |
| GO:0010677 | negative regulation of cellular carbohydrate metabolic process                                 | 0,023 |
| GO:0014742 | positive regulation of muscle hypertrophy                                                      | 0,023 |
| GO:0042113 | B cell activation                                                                              | 0,023 |
| GO:0042127 | regulation of cell proliferation                                                               | 0,023 |
| GO:0045912 | negative regulation of carbohydrate metabolic process                                          | 0,023 |
| GO:0046457 | prostanoid biosynthetic process                                                                | 0,023 |
| GO:0071844 | cellular component assembly at cellular level                                                  | 0,023 |
| GO:0002688 | regulation of leukocyte chemotaxis                                                             | 0,025 |
| GO:0032945 | negative regulation of mononuclear cell proliferation                                          | 0,025 |
| GO:0042116 | macrophage activation                                                                          | 0,025 |
| GO:0042592 | homeostatic process                                                                            | 0,025 |
| GO:0050672 | negative regulation of lymphocyte proliferation                                                | 0,025 |
| GO:0051896 | regulation of protein kinase B signaling cascade                                               | 0,025 |
| GO:0070374 | positive regulation of ERK1 and ERK2 cascade                                                   | 0,025 |
| GO:0031145 | anaphase-promoting complex-dependent proteasomal ubiquitin-dependent protein catabolic process | 0,026 |
| GO:0051270 | regulation of cellular component movement                                                      | 0,026 |
| GO:0007093 | mitotic cell cycle checkpoint                                                                  | 0,027 |
| GO:0090068 | positive regulation of cell cycle process                                                      | 0,027 |
| GO:0043484 | regulation of RNA splicing                                                                     | 0,028 |

|            |                                                                                                                           |       |
|------------|---------------------------------------------------------------------------------------------------------------------------|-------|
| GO:0048520 | positive regulation of behavior                                                                                           | 0,028 |
| GO:0006120 | mitochondrial electron transport, NADH to ubiquinone                                                                      | 0,029 |
| GO:0009451 | RNA modification                                                                                                          | 0,029 |
| GO:0010608 | posttranscriptional regulation of gene expression                                                                         | 0,029 |
| GO:0030888 | regulation of B cell proliferation                                                                                        | 0,029 |
| GO:0042129 | regulation of T cell proliferation                                                                                        | 0,029 |
| GO:0045744 | negative regulation of G-protein coupled receptor protein signaling pathway                                               | 0,029 |
| GO:0002682 | regulation of immune system process                                                                                       | 0,03  |
| GO:0006518 | peptide metabolic process                                                                                                 | 0,03  |
| GO:0051438 | regulation of ubiquitin-protein ligase activity                                                                           | 0,031 |
| GO:0002250 | adaptive immune response                                                                                                  | 0,032 |
| GO:0002709 | regulation of T cell mediated immunity                                                                                    | 0,032 |
| GO:0006692 | prostanoid metabolic process                                                                                              | 0,032 |
| GO:0045931 | positive regulation of mitotic cell cycle                                                                                 | 0,032 |
| GO:0050920 | regulation of chemotaxis                                                                                                  | 0,032 |
| GO:0006405 | RNA export from nucleus                                                                                                   | 0,033 |
| GO:0008344 | adult locomotory behavior                                                                                                 | 0,034 |
| GO:0003300 | cardiac muscle hypertrophy                                                                                                | 0,035 |
| GO:0006508 | proteolysis                                                                                                               | 0,035 |
| GO:0014897 | striated muscle hypertrophy                                                                                               | 0,035 |
| GO:0051352 | negative regulation of ligase activity                                                                                    | 0,035 |
| GO:0051436 | negative regulation of ubiquitin-protein ligase activity involved in mitotic cell cycle                                   | 0,035 |
| GO:0051444 | negative regulation of ubiquitin-protein ligase activity                                                                  | 0,035 |
| GO:0070265 | necrotic cell death                                                                                                       | 0,035 |
| GO:0022618 | ribonucleoprotein complex assembly                                                                                        | 0,036 |
| GO:0071826 | ribonucleoprotein complex subunit organization                                                                            | 0,036 |
| GO:0051340 | regulation of ligase activity                                                                                             | 0,037 |
| GO:0002551 | mast cell chemotaxis                                                                                                      | 0,038 |
| GO:0002687 | positive regulation of leukocyte migration                                                                                | 0,038 |
| GO:0033119 | negative regulation of RNA splicing                                                                                       | 0,038 |
| GO:0033631 | cell-cell adhesion mediated by integrin                                                                                   | 0,038 |
| GO:0035020 | regulation of Rac protein signal transduction                                                                             | 0,038 |
| GO:0045059 | positive thymic T cell selection                                                                                          | 0,038 |
| GO:0060997 | dendritic spine morphogenesis                                                                                             | 0,038 |
| GO:0060998 | regulation of dendritic spine development                                                                                 | 0,038 |
| GO:0071385 | cellular response to glucocorticoid stimulus                                                                              | 0,038 |
| GO:0072378 | blood coagulation, fibrin clot formation                                                                                  | 0,038 |
| GO:2001237 | negative regulation of extrinsic apoptotic signaling pathway                                                              | 0,038 |
| GO:0002443 | leukocyte mediated immunity                                                                                               | 0,041 |
| GO:0000216 | M/G1 transition of mitotic cell cycle                                                                                     | 0,042 |
| GO:0060326 | cell chemotaxis                                                                                                           | 0,042 |
| GO:0002460 | adaptive immune response based on somatic recombination of immune receptors built from immunoglobulin superfamily domains | 0,043 |
| GO:0030334 | regulation of cell migration                                                                                              | 0,043 |
| GO:0006879 | cellular iron ion homeostasis                                                                                             | 0,044 |

|            |                                                                                  |       |
|------------|----------------------------------------------------------------------------------|-------|
| GO:0051494 | negative regulation of cytoskeleton organization                                 | 0,044 |
| GO:0030837 | negative regulation of actin filament polymerization                             | 0,045 |
| GO:0033261 | regulation of S phase                                                            | 0,045 |
| GO:0071260 | cellular response to mechanical stimulus                                         | 0,045 |
| GO:0006952 | defense response                                                                 | 0,046 |
| GO:0045333 | cellular respiration                                                             | 0,046 |
| GO:0006644 | phospholipid metabolic process                                                   | 0,047 |
| GO:0048002 | antigen processing and presentation of peptide antigen                           | 0,047 |
| GO:0006417 | regulation of translation                                                        | 0,048 |
| GO:0007160 | cell-matrix adhesion                                                             | 0,049 |
| GO:0042590 | antigen processing and presentation of exogenous peptide antigen via MHC class I | 0,049 |
| GO:0043491 | protein kinase B signaling cascade                                               | 0,049 |
| GO:0050778 | positive regulation of immune response                                           | 0,049 |



Supplementary Table S5: GSEA on GO terms - cytological compartment of serum specimens of cancer patients in comparison to healthy individuals shows changes mainly in cytosolic or nuclear compartment (showed only GO terms with p-value < 0.05).

**Supplementary Table S5.**

GSEA on GO terms - cytological compartment of serum specimens of cancer patients in comparison to healthy individuals shows changes mainly in cytosolic or nuclear compartment (showed only GO terms with p-value < 0.05).

| GO ID      | GO term                                            | p-value  |
|------------|----------------------------------------------------|----------|
| GO:0022626 | cytosolic ribosome                                 | 4,20E-63 |
| GO:0044391 | ribosomal subunit                                  | 2,00E-57 |
| GO:0044445 | cytosolic part                                     | 2,30E-52 |
| GO:0005840 | ribosome                                           | 1,40E-50 |
| GO:0030529 | ribonucleoprotein complex                          | 1,40E-36 |
| GO:0022627 | cytosolic small ribosomal subunit                  | 7,90E-34 |
| GO:0022625 | cytosolic large ribosomal subunit                  | 7,10E-32 |
| GO:0015934 | large ribosomal subunit                            | 3,20E-30 |
| GO:0015935 | small ribosomal subunit                            | 4,10E-27 |
| GO:0005829 | cytosol                                            | 1,80E-22 |
| GO:0032991 | macromolecular complex                             | 2,00E-19 |
| GO:0044444 | cytoplasmic part                                   | 1,90E-12 |
| GO:0043228 | non-membrane-bounded organelle                     | 7,80E-12 |
| GO:0043232 | intracellular non-membrane-bounded organelle       | 7,80E-12 |
| GO:0005737 | cytoplasm                                          | 2,50E-09 |
| GO:0044422 | organelle part                                     | 1,00E-07 |
| GO:0044446 | intracellular organelle part                       | 1,30E-07 |
| GO:0044424 | intracellular part                                 | 2,20E-07 |
| GO:0005622 | intracellular                                      | 1,10E-06 |
| GO:0043226 | organelle                                          | 3,00E-06 |
| GO:0043229 | intracellular organelle                            | 3,30E-06 |
| GO:0005853 | eukaryotic translation elongation factor 1 complex | 2,00E-05 |
| GO:0008305 | integrin complex                                   | 0,00017  |
| GO:0005730 | nucleolus                                          | 3,00E-04 |
| GO:0031093 | platelet alpha granule lumen                       | 0,00039  |
| GO:0034774 | secretory granule lumen                            | 0,00039  |
| GO:0031091 | platelet alpha granule                             | 0,00047  |
| GO:0005623 | cell                                               | 0,00057  |
| GO:0044464 | cell part                                          | 0,00057  |
| GO:0031983 | vesicle lumen                                      | 0,00089  |
| GO:0060205 | cytoplasmic membrane-bounded vesicle lumen         | 0,00089  |
| GO:0044452 | nucleolar part                                     | 0,0013   |
| GO:0031974 | membrane-enclosed lumen                            | 0,0026   |

|            |                                                    |        |
|------------|----------------------------------------------------|--------|
| GO:0005681 | spliceosomal complex                               | 0,0027 |
| GO:0043233 | organelle lumen                                    | 0,0037 |
| GO:0043235 | receptor complex                                   | 0,0038 |
| GO:0001726 | ruffle                                             | 0,0041 |
| GO:0071013 | catalytic step 2 spliceosome                       | 0,0041 |
| GO:0042613 | MHC class II protein complex                       | 0,0044 |
| GO:0032587 | ruffle membrane                                    | 0,0046 |
| GO:0008180 | signalosome                                        | 0,0058 |
| GO:0044428 | nuclear part                                       | 0,0064 |
| GO:0005742 | mitochondrial outer membrane translocase complex   | 0,0069 |
| GO:0031594 | neuromuscular junction                             | 0,0069 |
| GO:0005771 | multivesicular body                                | 0,0073 |
| GO:0016604 | nuclear body                                       | 0,009  |
| GO:0045211 | postsynaptic membrane                              | 0,011  |
| GO:0005852 | eukaryotic translation initiation factor 3 complex | 0,012  |
| GO:0005868 | cytoplasmic dynein complex                         | 0,012  |
| GO:0005912 | adherens junction                                  | 0,012  |
| GO:0031256 | leading edge membrane                              | 0,014  |
| GO:0031981 | nuclear lumen                                      | 0,014  |
| GO:0070161 | anchoring junction                                 | 0,014  |
| GO:0042611 | MHC protein complex                                | 0,018  |
| GO:0030054 | cell junction                                      | 0,019  |
| GO:0043209 | myelin sheath                                      | 0,019  |
| GO:0044291 | cell-cell contact zone                             | 0,019  |
| GO:0070013 | intracellular organelle lumen                      | 0,019  |
| GO:0005924 | cell-substrate adherens junction                   | 0,02   |
| GO:0016272 | prefoldin complex                                  | 0,02   |
| GO:0030055 | cell-substrate junction                            | 0,02   |
| GO:0001725 | stress fiber                                       | 0,021  |
| GO:0005747 | mitochondrial respiratory chain complex I          | 0,021  |
| GO:0030018 | Z disc                                             | 0,021  |
| GO:0030964 | NADH dehydrogenase complex                         | 0,021  |
| GO:0032432 | actin filament bundle                              | 0,021  |
| GO:0045271 | respiratory chain complex I                        | 0,021  |
| GO:0045121 | membrane raft                                      | 0,026  |
| GO:0005925 | focal adhesion                                     | 0,027  |
| GO:0009986 | cell surface                                       | 0,027  |
| GO:0030141 | secretory granule                                  | 0,027  |
| GO:0015030 | Cajal body                                         | 0,033  |
| GO:0008043 | intracellular ferritin complex                     | 0,034  |
| GO:0008290 | F-actin capping protein complex                    | 0,034  |
| GO:0030056 | hemidesmosome                                      | 0,034  |
| GO:0070288 | ferritin complex                                   | 0,034  |
| GO:0009897 | external side of plasma membrane                   | 0,037  |
| GO:0009295 | nucleoid                                           | 0,039  |
| GO:0042645 | mitochondrial nucleoid                             | 0,039  |
| GO:0005604 | basement membrane                                  | 0,045  |

GO:0014704    intercalated disc

0,045
